# Supplementary material for: Divergence of the bZIP Gene Family in Strawberry, Peach, and Apple Suggests Multiple Modes of Gene Evolution after Duplication
Source: Int J Genomics. 2015 Dec 7;2015:536943. doi: 10.1155/2015/536943 (PMC4685131; doi:10.1155/2015/536943)
Supplement: Supplementary file 1 — Figure S1. Phylogenetic tree constructed by the neighbor-joining method using protein sequences of the bZIP-domains in strawberry, apple, peach, and A. thaliana. Only bootstrap values larger than 50% are indicated. Different colors can be used to distinguish the different subgroups. The names of each subgroup are listed on the right. Table S1. bZIP genes in C. sativus, M. truncatula, P. trichocarpa, B. rapa, C. papaya, T. cacao, S. lycopersicum, M. acuminata, S. moellendorffii, P. patens, C. reinhardtii, C. merolae, and S. cerevisiae. Table S2. bZIP genes in strawberry, apple and peach. Gene name, chromosomal location, sequence and location of bZIP-domain, sequence of the full-length protein. Table S3. Ka/Ks ratio of bZIP genes in clade A-S. Table S4. Ka/Ks ratio of bZIP orthologs and paralogs in clades A-S. Table S5. Ka/Ks ratios of bZIP domains, BR and LZ domains in clades A-S. Table S6. Orthologous gene pairs of bZIP genes in strawberry, apple and peach. Gene name, clade, location, ORF length, and number of exons (Fv–strawberry; Md–apple; Pp–peach). Table S7. Orthologous chromosomes in strawberry, apple and peach (FC–strawberry chromosome; MC–apple chromosome; PC–peach chromosome). [file 536943.f1.zip › 536943.f1/Supplementary/Table S1.xlsx]

## Sheet: Sheet1
Table S1. bZIP genes in C. sativus, M. truncatula, P. trichocarpa, B. rapa, C. papaya, T. cacao, S. lycopersicum, M. acuminata, S. moellendorffii, P. patens, C. reinhardtii, C. merolae, and S. cerevisiae.
C.sativus	M.truncatula	P.trichocarpa	B.rapa	C.papaya	T.cacao	S.lycopersicum	M.acuminata	S.moellendorffii	P.patens	C.reinhardtii	C.merolae	S.cerevisiae
Cucsa.104970.11	Medtr8g077950.2	Potri.007G029400.2	Bra011701	evm.model.supercontig_158.7	Thecc1EG005210t2	Solyc02g085610.2.1	GSMUA_Achr5P14150_001	125734	Pp1s33_301V6.1	Cre16.g692250.t1.3	CMJ034C	YER045C
Cucsa.104970.10	Medtr8g077950.1	Potri.007G029400.3	Bra010572	evm.model.supercontig_2741.1	Thecc1EG000436t2	Solyc02g062950.2.1	GSMUA_Achr4P04530_001	135978	Pp1s33_301V6.2	g7353.t1	CMT383C	YEL009C
Cucsa.104970.1	Medtr5g028850.1	Potri.007G029400.1	Bra037382	evm.model.supercontig_244.3	Thecc1EG000436t1	Solyc01g095460.2.1	GSMUA_Achr9P05310_001	38594	Pp1s3_150V6.1	Cre05.g238250.t1.2	CMO273C	YOR028C
Cucsa.104970.2	Medtr7g116890.2	Potri.003G097600.2	Bra005335	evm.model.supercontig_49.26	Thecc1EG005210t4	Solyc08g076100.2.1	GSMUA_Achr4P18980_001	39427	Pp1s3_150V6.2	Cre10.g438850.t1.2	CML282C	YIL036W
Cucsa.104970.3	Medtr7g116890.1	Potri.005G126000.2	Bra004550	evm.model.supercontig_70.1	Thecc1EG005210t3	Solyc08g005290.2.1	GSMUA_Achr6P32000_001	270282	Pp1s27_273V6.1	Cre10.g454850.t1.2		YDR259C
Cucsa.104970.4	Medtr7g088090.1	Potri.005G126000.3	Bra023243	evm.model.supercontig_115.9	Thecc1EG005210t1	Solyc05g050220.2.1	GSMUA_Achr6P00170_001	67189	Pp1s206_122V6.1	g8020.t1		YHL009C
Cucsa.104970.7	AC146721_1015.1	Potri.005G126000.1	Bra023012	evm.model.supercontig_52.101	Thecc1EG016606t1	Solyc02g083520.2.1	GSMUA_Achr4P33130_001	444199	Pp1s83_243V6.2	Cre13.g590350.t1.2		YNL167C
Cucsa.258940.9	Medtr8g043960.1	Potri.001G136000.1	Bra009793	evm.model.supercontig_53.3	Thecc1EG016606t2	Solyc01g008980.2.1	GSMUA_Achr6P01090_001	91900	Pp1s83_243V6.3	Cre07.g321550.t1.2		YML007W
Cucsa.258940.2	Medtr3g010660.1	Potri.001G136000.2	Bra020471	evm.model.supercontig_5.28	Thecc1EG044596t3	Solyc10g081350.1.1	GSMUA_Achr1P05050_001	73198	Pp1s189_104V6.2	Cre12.g489000.t1.3		YDR423C
Cucsa.258940.7	Medtr7g115120.2	Potri.014G062400.1	Bra016953	evm.model.supercontig_33.182	Thecc1EG033824t1	Solyc08g006110.2.1	GSMUA_Achr4P27400_001	266892	Pp1s213_13V6.2	Cre09.g413050.t1.3		YOL028C
Cucsa.258940.8	Medtr7g115120.1	Potri.014G062400.2	Bra023317	evm.model.supercontig_142.59	Thecc1EG033824t2	Solyc01g097330.2.1	GSMUA_AchrUn_randomP02860_001	17886	Pp1s220_102V6.1	Cre12.g501600.t1.2		YIR018W
Cucsa.258940.1	Medtr8g086020.1	Potri.003G097600.1	Bra015281	evm.model.supercontig_3.213	Thecc1EG019070t1	Solyc04g078840.2.1	GSMUA_Achr4P11610_001	99404	Pp1s49_161V6.1	Cre06.g310500.t1.2		YPR199C
Cucsa.312800.1	Medtr1g087040.1	Potri.014G094200.2	Bra017251	evm.model.supercontig_62.4	Thecc1EG044596t1	Solyc02g089420.1.1	GSMUA_Achr2P03490_001	73196	Pp1s158_113V6.1	Cre01.g051150.t1.3		YIR017C
Cucsa.322110.1	Medtr3g101780.1	Potri.003G097600.3	Bra005287	evm.model.supercontig_21.207	Thecc1EG044596t2	Solyc08g061130.2.1	GSMUA_Achr10P08670_001	402651	Pp1s158_113V6.2	Cre12.g557300.t1.3		YFL031W
Cucsa.322110.2	Medtr6g026800.1	Potri.014G094200.3	Bra033719	evm.model.supercontig_538.1	Thecc1EG007292t2	Solyc04g071510.2.1	GSMUA_Achr1P15640_001	77868	Pp1s220_101V6.1	Cre12.g510200.t1.2
Cucsa.289120.3	Medtr1g098590.1	Potri.014G094200.1	Bra008976	evm.model.supercontig_1782.2	Thecc1EG007292t1	Solyc03g033730.1.1	GSMUA_Achr2P12610_001	231160	Pp1s206_123V6.1	Cre14.g631750.t2.1
Cucsa.289120.2	Medtr4g085910.1	Potri.002G167100.1	Bra004597	evm.model.supercontig_34.221	Thecc1EG022574t3	Solyc01g100460.2.1	GSMUA_Achr3P22470_001	231344	Pp1s355_22V6.1	Cre14.g631750.t1.3
Cucsa.289120.1	Medtr1g008990.3	Potri.006G277800.5	Bra014668	evm.model.supercontig_92.68	Thecc1EG038392t1	Solyc04g005170.1.1	GSMUA_Achr11P15610_001	34663	Pp1s355_24V6.1	g18047.t1
Cucsa.161540.1	Medtr5g088230.1	Potri.006G277800.7	Bra025418	evm.model.supercontig_6.175	Thecc1EG014407t1	Solyc09g009490.2.1	GSMUA_Achr2P20490_001	443825	Pp1s80_72V6.3	Cre16.g653300.t1.2
Cucsa.364380.1	AC233100_57.1	Potri.006G277800.1	Bra007274	evm.model.supercontig_18.43	Thecc1EG044596t5	Solyc01g104650.2.1	GSMUA_Achr2P07520_001	409920	Pp1s80_72V6.1	Cre06.g288000.t1.3
Cucsa.364380.2	Medtr7g057160.1	Potri.006G277800.2	Bra007276	evm.model.supercontig_81.160	Thecc1EG026349t1	Solyc08g022080.2.1	GSMUA_Achr4P28530_001	413715	Pp1s80_72V6.2	Cre16.g675700.t1.3
Cucsa.364380.3	Medtr7g088890.1	Potri.006G277800.6	Bra024310	evm.model.supercontig_100.3	Thecc1EG011390t1	Solyc01g009510.1.1	GSMUA_Achr4P05090_001	444176	Pp1s147_89V6.4	Cre01.g043150.t1.2
Cucsa.364380.4	Medtr1g008990.1	Potri.006G277800.3	Bra020735	evm.model.supercontig_146.5	Thecc1EG000152t1	Solyc04g080740.1.1	GSMUA_Achr1P23640_001	439314	Pp1s87_156V6.1	g3642.t1
Cucsa.133290.1	Medtr4g070860.1	Potri.008G113400.1	Bra010010	evm.model.supercontig_131.79	Thecc1EG022574t4	Solyc03g043900.1.1	GSMUA_Achr1P25340_001		Pp1s147_89V6.1	g16144.t1
Cucsa.162360.2	Medtr7g104480.1	Potri.010G248100.1	Bra003253	evm.model.supercontig_438.4	Thecc1EG022574t6	Solyc02g084860.1.1	GSMUA_Achr6P04270_001		Pp1s147_89V6.2
Cucsa.374400.1	Medtr1g023690.1	Potri.013G040700.3	Bra020620	evm.model.supercontig_32.14	Thecc1EG006840t1	Solyc03g046440.1.1	GSMUA_Achr6P15970_001		Pp1s147_89V6.3
Cucsa.284240.1	Medtr3g109310.1	Potri.006G251800.1	Bra040260	evm.model.supercontig_85.93	Thecc1EG035623t1	Solyc10g050210.1.1	GSMUA_Achr7P09980_001		Pp1s158_117V6.1
Cucsa.162360.1	Medtr1g008850.1	Potri.008G010800.1	Bra000102	evm.model.supercontig_1.202	Thecc1EG007074t1	Solyc01g108080.2.1	GSMUA_Achr5P17850_001		Pp1s25_341V6.1
Cucsa.322810.1	Medtr2g045700.1	Potri.002G045800.4	Bra011485	evm.model.supercontig_19.62	Thecc1EG007074t2	Solyc10g054010.1.1	GSMUA_Achr10P27050_001		Pp1s62_67V6.1
Cucsa.238410.1	Medtr3g117120.1	Potri.013G040700.2	Bra036251	evm.model.supercontig_209.8	Thecc1EG022574t1	Solyc10g078290.1.1	GSMUA_Achr5P06060_001		Pp1s126_196V6.2
Cucsa.396070.1	Medtr8g075130.1	Potri.010G248300.2	Bra007083	evm.model.supercontig_49.112	Thecc1EG022574t2	Solyc01g079480.2.1	GSMUA_Achr8P07740_001		Pp1s38_310V6.1
Cucsa.364380.5	Medtr7g109510.1	Potri.013G040700.1	Bra014802	evm.model.supercontig_21.185	Thecc1EG036784t2	Solyc01g109880.2.1	GSMUA_Achr9P08900_001		Pp1s48_101V6.2
Cucsa.174700.1	Medtr5g015090.1	Potri.014G028200.1	Bra026523	evm.model.supercontig_5.165	Thecc1EG036784t1	Solyc06g060490.2.1	GSMUA_AchrUn_randomP12190_001		Pp1s3_401V6.1
Cucsa.184670.2	Medtr2g086390.1	Potri.004G111100.1	Bra019436	evm.model.supercontig_847.1	Thecc1EG034992t1	Solyc06g009640.1.1	GSMUA_Achr10P10440_001		Pp1s48_101V6.1
Cucsa.396070.2	Medtr3g087940.1	Potri.018G029500.2	Bra019715	evm.model.supercontig_129.74	Thecc1EG004222t1	Solyc07g062710.2.1	GSMUA_Achr6P30550_001		Pp1s16_138V6.1
Cucsa.106390.1	Medtr2g086340.1	Potri.018G029500.3	Bra035957	evm.model.supercontig_37.136	Thecc1EG044596t4	Solyc04g071160.2.1	GSMUA_Achr5P24570_001		Pp1s126_196V6.1
Cucsa.310450.1	Medtr3g044820.1	Potri.005G053200.1	Bra013005	evm.model.supercontig_2.298	Thecc1EG006432t2	Solyc11g044560.1.1	GSMUA_Achr4P03790_001		Pp1s20_116V6.1
Cucsa.274650.1	Medtr7g092750.2	Potri.014G028200.2	Bra017359	evm.model.supercontig_150.7	Thecc1EG006432t1	Solyc10g080770.1.1	GSMUA_Achr5P05690_001		Pp1s512_3V6.1
Cucsa.388800.1	Medtr7g092750.1	Potri.014G028200.4	Bra023540	evm.model.supercontig_9.75	Thecc1EG042034t3	Solyc07g053450.2.1	GSMUA_Achr3P22710_001		Pp1s7_246V6.1
Cucsa.184670.1	Medtr2g045670.1	Potri.002G045800.3	Bra018800	evm.TU.contig_24967.6	Thecc1EG034664t1	Solyc04g011670.2.1	GSMUA_Achr9P28570_001		Pp1s7_246V6.2
Cucsa.184670.4	Medtr8g038860.1	Potri.002G045800.1	Bra016959	evm.model.supercontig_9.313	Thecc1EG034172t1	Solyc11g064950.1.1	GSMUA_Achr9P27130_001		Pp1s22_364V6.1
Cucsa.385090.1	Medtr8g091650.1	Potri.018G029500.1	Bra008670	evm.model.supercontig_5.51	Thecc1EG004733t1	Solyc01g110480.2.1	GSMUA_Achr7P07650_001		Pp1s22_364V6.2
Cucsa.363740.2	Medtr2g099050.1	Potri.009G119700.1	Bra021258	evm.model.supercontig_38.34	Thecc1EG034106t1	Solyc04g072460.2.1	GSMUA_Achr8P29960_001		Pp1s22_364V6.3
Cucsa.248080.1	AC233675_22.1	Potri.006G251800.2	Bra037235	evm.model.supercontig_26.287	Thecc1EG000304t1	Solyc06g053350.2.1	GSMUA_Achr8P22330_001		Pp1s447_20V6.1
Cucsa.241090.1	Medtr4g079500.1	Potri.002G125400.1	Bra022225	evm.TU.contig_30412.2	Thecc1EG034172t2	Solyc02g092090.1.1	GSMUA_Achr9P21040_001		Pp1s30_324V6.2
Cucsa.363740.1	Medtr5g022780.1	Potri.017G106700.1	Bra024478		Thecc1EG041430t1	Solyc03g043830.1.1	GSMUA_Achr10P00420_001		Pp1s30_324V6.1
Cucsa.184670.3	Medtr2g086420.1	Potri.010G135200.1	Bra017850		Thecc1EG042034t1	Solyc04g056460.1.1	GSMUA_Achr11P05140_001		Pp1s30_324V6.3
Cucsa.113510.1	Medtr8g091650.2	Potri.014G028200.3	Bra003755		Thecc1EG042034t4	Solyc12g010800.1.1	GSMUA_Achr3P28710_001		Pp1s30_324V6.4
Cucsa.219780.1	Medtr4g053250.1	Potri.013G040700.4	Bra014680		Thecc1EG042034t5	Solyc12g056860.1.1	GSMUA_Achr10P20720_001		Pp1s258_7V6.1
Cucsa.219780.2	Medtr5g075390.1	Potri.006G025800.1	Bra037533		Thecc1EG004222t2	Solyc10g080410.1.1	GSMUA_Achr3P28800_001		Pp1s68_33V6.1
Cucsa.184670.5	Medtr5g054900.1	Potri.006G083000.1	Bra025144		Thecc1EG004807t1	Solyc06g048630.2.1	GSMUA_Achr3P07000_001		Pp1s68_33V6.2
Cucsa.142580.1	Medtr4g072090.1	Potri.009G101200.1	Bra038341		Thecc1EG023889t1	Solyc06g049040.2.1	GSMUA_Achr8P21560_001		Pp1s20_118V6.1
Cucsa.205050.1	Medtr7g089800.2	Potri.016G024000.2	Bra011545		Thecc1EG042188t1	Solyc04g081190.2.1	GSMUA_Achr9P09280_001		Pp1s20_119V6.1
Cucsa.337510.1	Medtr7g089800.1	Potri.005G192900.1	Bra001742		Thecc1EG031686t1	Solyc11g068370.1.1	GSMUA_Achr1P12710_001		Pp1s93_157V6.1
Cucsa.342680.1	AC140545_23.1	Potri.016G024000.1	Bra006324		Thecc1EG034172t3	Solyc10g078670.1.1	GSMUA_Achr5P27130_001		Pp1s71_364V6.1
Cucsa.109420.1	AC225518_31.1	Potri.002G067400.1	Bra026895		Thecc1EG034993t1	Solyc03g043820.1.1	GSMUA_Achr11P25190_001		Pp1s257_96V6.1
Cucsa.043170.1	Medtr8g040120.1	Potri.009G164500.2	Bra026896		Thecc1EG041421t3	Solyc03g043840.1.1	GSMUA_Achr6P05280_001		Pp1s282_2V6.1
Cucsa.395470.1	Medtr4g097440.1	Potri.010G248300.1	Bra017664		Thecc1EG000835t1	Solyc01g008730.2.1	GSMUA_Achr4P06440_001		Pp1s282_2V6.2
Cucsa.096740.1	Medtr8g088650.2	Potri.004G158200.1	Bra007679		Thecc1EG006766t3	Solyc05g009660.2.1	GSMUA_Achr10P12910_001		Pp1s34_90V6.2
Cucsa.142580.2	Medtr8g088650.1	Potri.015G047700.1	Bra022409		Thecc1EG041421t1	Solyc04g054320.2.1	GSMUA_Achr9P14690_001		Pp1s34_90V6.3
Cucsa.142580.3	Medtr5g060950.1	Potri.009G164500.1	Bra008192		Thecc1EG041421t2	Solyc06g074320.2.1	GSMUA_Achr10P01440_001		Pp1s34_90V6.1
Cucsa.353000.1	Medtr4g073100.1	Potri.002G031900.1	Bra003500		Thecc1EG001212t3	Solyc03g043810.1.1	GSMUA_Achr11P23650_001		Pp1s2_72V6.1
Cucsa.103380.1	Medtr2g045630.1	Potri.010G004200.3	Bra001671		Thecc1EG001212t2	Solyc01g111580.2.1	GSMUA_Achr2P06540_001		Pp1s150_133V6.1
Cucsa.201510.3	Medtr7g104190.1	Potri.010G004200.2	Bra029353		Thecc1EG019998t1	Solyc09g009760.1.1	GSMUA_Achr11P20700_001		Pp1s105_16V6.1
Cucsa.309420.1	Medtr3g005230.1	Potri.010G004200.4	Bra034639		Thecc1EG001212t1	Solyc11g020950.1.1	GSMUA_Achr5P05350_001
Cucsa.385130.2	Medtr8g013980.1	Potri.010G004200.5	Bra034147		Thecc1EG045524t2	Solyc04g082890.2.1	GSMUA_Achr9P06540_001
Cucsa.385130.1		Potri.006G277800.4	Bra023224		Thecc1EG006766t2	Solyc08g074860.1.1	GSMUA_Achr6P36230_001
Cucsa.199800.3		Potri.009G075000.1	Bra030314		Thecc1EG045524t1	Solyc10g055550.1.1	GSMUA_Achr8P21670_001
Cucsa.199800.2		Potri.001G220700.1	Bra039631		Thecc1EG024862t1	Solyc11g006490.1.1	GSMUA_Achr3P03550_001
Cucsa.122790.1		Potri.005G231300.1	Bra028604		Thecc1EG003607t1		GSMUA_Achr4P10560_001
Cucsa.088250.2		Potri.014G120800.1	Bra031871		Thecc1EG031726t1		GSMUA_Achr5P16630_001
Cucsa.088250.4		Potri.001G220700.3	Bra021735		Thecc1EG023491t1		GSMUA_Achr4P11290_001
Cucsa.199800.1		Potri.002G196200.1	Bra027855		Thecc1EG034270t1		GSMUA_Achr6P26930_001
Cucsa.201510.7		Potri.005G217500.1	Bra032191		Thecc1EG023491t2		GSMUA_Achr5P26200_001
Cucsa.088250.1		Potri.001G220700.2	Bra024424		Thecc1EG011845t2		GSMUA_Achr11P03050_001
Cucsa.272470.1		Potri.009G018500.1	Bra009063		Thecc1EG023491t3		GSMUA_Achr3P22700_001
Cucsa.148840.1		Potri.005G170500.4	Bra011780		Thecc1EG023491t4		GSMUA_Achr5P29650_001
Cucsa.201510.6		Potri.007G019900.1	Bra034916		Thecc1EG023491t7		GSMUA_Achr10P15870_001
Cucsa.201510.5		Potri.005G243400.1	Bra024366		Thecc1EG011845t1		GSMUA_AchrUn_randomP13810_001
Cucsa.201510.4		Potri.005G170500.2	Bra015471		Thecc1EG035528t1		GSMUA_Achr6P08660_001
Cucsa.201510.1		Potri.006G277800.8	Bra015646		Thecc1EG023492t1		GSMUA_Achr5P11470_001
Cucsa.201510.2		Potri.005G170500.1	Bra018250		Thecc1EG023492t2		GSMUA_Achr3P24300_001
Cucsa.062530.1		Potri.010G004200.1	Bra016980		Thecc1EG023492t3		GSMUA_Achr3P24960_001
Cucsa.337740.5		Potri.005G119300.1	Bra031845		Thecc1EG006766t1		GSMUA_Achr9P27700_001
Cucsa.365420.1		Potri.007G006900.1	Bra034668		Thecc1EG021347t1		GSMUA_Achr10P30500_001
Cucsa.337740.3		Potri.016G032400.2	Bra030312		Thecc1EG023491t6		GSMUA_Achr3P11150_001
Cucsa.337740.4		Potri.007G085700.1	Bra004689		Thecc1EG023491t5		GSMUA_AchrUn_randomP14020_001
Cucsa.242870.1		Potri.007G085700.2	Bra033649		Thecc1EG023491t8		GSMUA_Achr6P13040_001
Cucsa.118900.1		Potri.007G085700.3	Bra004582		Thecc1EG042286t1		GSMUA_Achr9P15550_001
Cucsa.337740.2		Potri.016G032400.1	Bra037809		Thecc1EG042360t1		GSMUA_Achr11P25310_001
Cucsa.337740.1		Potri.002G196200.2	Bra031622		Thecc1EG042360t2		GSMUA_Achr11P14990_001
Cucsa.005120.1		Potri.005G082000.5	Bra000256		Thecc1EG034804t1		GSMUA_Achr2P06770_001
Cucsa.005120.2		Potri.005G082000.1	Bra003320		Thecc1EG021629t1		GSMUA_AchrUn_randomP00680_001
Cucsa.005120.3		Potri.005G082000.2	Bra007380		Thecc1EG006946t1		GSMUA_Achr3P31390_001
Cucsa.251880.1		Potri.005G082000.3	Bra018634		Thecc1EG006946t2		GSMUA_AchrUn_randomP12130_001
Cucsa.251880.2		Potri.005G082000.4	Bra037374		Thecc1EG006625t7		GSMUA_Achr8P05800_001
Cucsa.382190.1		Potri.004G140600.7	Bra004329		Thecc1EG006625t1		GSMUA_Achr1P08090_001
Cucsa.382190.2		Potri.002G090700.4	Bra030637		Thecc1EG006625t4		GSMUA_Achr8P12090_001
Cucsa.382180.1		Potri.014G013400.1	Bra015847		Thecc1EG006625t5		GSMUA_Achr10P10300_001
Cucsa.382180.2		Potri.002G090700.1	Bra033582		Thecc1EG006625t6		GSMUA_Achr11P12720_001
Cucsa.234250.3		Potri.002G090700.2	Bra011580		Thecc1EG006625t3		GSMUA_Achr9P20200_001
Cucsa.234250.4		Potri.002G090700.5	Bra009241		Thecc1EG006625t2		GSMUA_Achr5P25700_001
Cucsa.234250.2		Potri.013G091400.1	Bra028713		Thecc1EG044334t1		GSMUA_Achr11P25140_001
Cucsa.234250.1		Potri.001G374200.3	Bra001443		Thecc1EG022516t2		GSMUA_Achr1P26400_001
Cucsa.382180.3		Potri.001G374200.4	Bra000195		Thecc1EG022516t3		GSMUA_Achr2P18830_001
Cucsa.307820.1		Potri.004G140600.9	Bra034767		Thecc1EG022516t1		GSMUA_Achr4P29580_001
Cucsa.143950.1		Potri.004G140600.8	Bra038705		Thecc1EG002540t1		GSMUA_Achr3P12290_001
Cucsa.363640.1		Potri.004G140600.1	Bra031541		Thecc1EG002540t2		GSMUA_Achr7P25310_001
Cucsa.370550.1		Potri.004G140600.2	Bra016389		Thecc1EG032113t5		GSMUA_Achr8P23510_001
Cucsa.079030.1		Potri.004G140600.3	Bra030663		Thecc1EG032113t4		GSMUA_Achr5P20200_001
Cucsa.032880.1		Potri.004G140600.4	Bra005971		Thecc1EG000610t1		GSMUA_Achr11P26170_001
Cucsa.032880.2		Potri.004G140600.5	Bra033464		Thecc1EG032113t1		GSMUA_Achr3P00670_001
Cucsa.282780.1		Potri.004G140600.6	Bra009288		Thecc1EG032113t2		GSMUA_Achr3P25020_001
Cucsa.240980.3		Potri.013G124400.1	Bra017316		Thecc1EG032113t3		GSMUA_Achr10P00340_001
Cucsa.240980.2		Potri.006G034500.1	Bra010035		Thecc1EG040798t1		GSMUA_Achr1P19750_001
Cucsa.240980.1		Potri.016G049200.1	Bra031364		Thecc1EG035106t2		GSMUA_Achr11P14570_001
Cucsa.075970.2		Potri.004G175200.1	Bra030310		Thecc1EG007378t1		GSMUA_Achr6P18130_001
Cucsa.075970.1		Potri.004G175200.4	Bra031172		Thecc1EG040798t2		GSMUA_Achr5P11220_001
		Potri.004G175200.8	Bra036025		Thecc1EG040798t3		GSMUA_Achr3P19170_001
		Potri.004G175200.2	Bra010722		Thecc1EG035106t1		GSMUA_Achr7P03840_001
		Potri.004G175200.3	Bra013048		Thecc1EG007089t1		GSMUA_Achr10P09470_001
		Potri.004G175200.5	Bra017735		Thecc1EG015119t1		GSMUA_Achr4P00320_001
		Potri.004G175200.6	Bra037290		Thecc1EG040032t1		GSMUA_Achr6P32530_001
		Potri.004G175200.7	Bra035464		Thecc1EG045527t3		GSMUA_Achr2P11200_001
		Potri.006G039000.2	Bra031173		Thecc1EG042849t1		GSMUA_Achr5P17400_001
		Potri.004G163800.2	Bra036142		Thecc1EG033671t1		GSMUA_Achr5P17460_001
		Potri.006G058800.3	Bra025743		Thecc1EG004951t1		GSMUA_Achr4P10150_001
		Potri.006G058800.2	Bra027885		Thecc1EG021199t3		GSMUA_Achr1P14830_001
		Potri.006G058800.1	Bra009426		Thecc1EG014964t1		GSMUA_Achr6P18320_001
		Potri.004G203400.3	Bra034913		Thecc1EG026987t2		GSMUA_Achr9P02570_001
		Potri.004G203400.4			Thecc1EG007777t1		GSMUA_Achr3P19190_001
		Potri.006G039000.3			Thecc1EG021124t1		GSMUA_Achr3P02820_001
		Potri.005G190700.3			Thecc1EG000204t2		GSMUA_Achr9P00300_001
		Potri.002G090800.1			Thecc1EG016795t1		GSMUA_Achr8P29390_001
		Potri.006G039000.1			Thecc1EG033298t5
		Potri.001G374200.1			Thecc1EG033298t2
		Potri.001G374200.2			Thecc1EG034628t1
		Potri.014G007100.1			Thecc1EG030175t1
		Potri.016G036500.1			Thecc1EG030175t2
		Potri.009G164300.1			Thecc1EG030175t3
		Potri.007G130800.1			Thecc1EG026987t1
		Potri.001G371300.1			Thecc1EG019709t2
		Potri.002G115900.1			Thecc1EG033298t1
		Potri.001G020200.2			Thecc1EG033298t4
		Potri.007G130800.2			Thecc1EG035212t1
		Potri.010G128000.1			Thecc1EG006040t1
		Potri.005G190700.1			Thecc1EG006040t2
		Potri.017G027400.1			Thecc1EG033298t3
		Potri.013G156900.2			Thecc1EG036283t3
		Potri.001G020200.1			Thecc1EG036283t2
		Potri.008G118300.2			Thecc1EG012303t1
		Potri.009G125400.1
		Potri.008G118300.1
		Potri.013G156900.3
		Potri.013G156900.1
		Potri.005G190700.2
		Potri.001G029800.1
		Potri.001G029800.5
		Potri.001G029800.6
		Potri.001G029800.8
		Potri.001G029800.9
		Potri.001G029800.2
		Potri.004G163800.1
		Potri.019G091900.2
		Potri.019G091900.1
		Potri.002G069500.1
		Potri.001G029800.10
		Potri.009G134900.1
		Potri.009G134900.2
		Potri.009G134900.3
		Potri.009G134900.4
		Potri.003G204400.1
		Potri.003G204400.2
		Potri.002G069500.2
		Potri.019G130000.2
		Potri.019G130000.1
		Potri.010G142900.1
		Potri.001G029800.4
		Potri.001G029800.7
		Potri.003G194600.9
		Potri.001G029800.3
		Potri.003G194600.8
		Potri.003G194600.4
		Potri.003G194600.1
		Potri.003G194600.2
		Potri.003G194600.3
		Potri.003G194600.5
		Potri.003G194600.6
		Potri.003G194600.7
		Potri.016G121700.1
		Potri.008G106700.1
		Potri.001G077900.1
		Potri.001G077900.2
		Potri.010G242800.2
		Potri.010G242800.3
		Potri.010G242800.4
		Potri.010G242800.1
		Potri.006G114600.2
		Potri.006G114600.1
		Potri.004G203400.2
		Potri.004G203400.1
		Potri.009G164300.2
		Potri.003G014800.3
		Potri.004G219100.2
		Potri.005G257900.3
		Potri.005G257900.2
		Potri.003G014800.2
		Potri.005G257900.1
		Potri.008G018400.1
		Potri.008G018400.2
		Potri.004G219100.1
		Potri.004G219100.3
