# Supplementary material for: Divergence of the bZIP Gene Family in Strawberry, Peach, and Apple Suggests Multiple Modes of Gene Evolution after Duplication
Source: Int J Genomics. 2015 Dec 7;2015:536943. doi: 10.1155/2015/536943 (PMC4685131; doi:10.1155/2015/536943)
Supplement: Supplementary file 1 — Figure S1. Phylogenetic tree constructed by the neighbor-joining method using protein sequences of the bZIP-domains in strawberry, apple, peach, and A. thaliana. Only bootstrap values larger than 50% are indicated. Different colors can be used to distinguish the different subgroups. The names of each subgroup are listed on the right. Table S1. bZIP genes in C. sativus, M. truncatula, P. trichocarpa, B. rapa, C. papaya, T. cacao, S. lycopersicum, M. acuminata, S. moellendorffii, P. patens, C. reinhardtii, C. merolae, and S. cerevisiae. Table S2. bZIP genes in strawberry, apple and peach. Gene name, chromosomal location, sequence and location of bZIP-domain, sequence of the full-length protein. Table S3. Ka/Ks ratio of bZIP genes in clade A-S. Table S4. Ka/Ks ratio of bZIP orthologs and paralogs in clades A-S. Table S5. Ka/Ks ratios of bZIP domains, BR and LZ domains in clades A-S. Table S6. Orthologous gene pairs of bZIP genes in strawberry, apple and peach. Gene name, clade, location, ORF length, and number of exons (Fv–strawberry; Md–apple; Pp–peach). Table S7. Orthologous chromosomes in strawberry, apple and peach (FC–strawberry chromosome; MC–apple chromosome; PC–peach chromosome). [file 536943.f1.zip › 536943.f1/Supplementary/Table S2.xlsx]

## Sheet: Fragaria vesca
Table S2. bZIP genes in strawberry, apple and peach. Gene name, chromosomal location, sequence and location of bZIP-domain, sequence of the full-length protein.
Gene name	Location		Chromosome	Predicted bzip domain			Protein
	start	end		sequence	start	end	Length	sequence
mrna29546	5225163	5235345	unanchored	ERELKRQKRKQSNRESARRSRLRKQAECEELQKSVHGLTNENHGLKDELQRLSQECEKLASENTS	642	707	734	MAGSGVFTVTDNDLFDYFPENNAGKDDEGCVLSAKGSNFVFNLDQSLLIDASCVVIGQVLGEGPQSIVYEGLYNSKPVAVKIIQPDETGLINPERKEKFQREVTLLSKAKHDNIVKFIGASVEPIMMIVTELMRGGTIQKYLWGTRPVVLDLKLSISFALDICRAMEYLHANGIIHRDLKPSNLLLSENKKQVKLADFGLAREQIEGAMTSEAGTYRWMAPELFSIEPVPKGAMKEYDHKADVYSFSIVLWELLTNKTPFKGRNNIMVAYATANNVRPNLEDIPKEITPLLKSCWAEDPKDRPEFMEVTDFLSKFYQEHCLKETKPPPKAIETESNERNIEEHNEKSIKEEESLSTSKPHVNEKLEEEKWVKRRKKSWSSSCRGVFAETIEMGTGEEGT…
mrna13716	15996385	16008713	LG5	ERELKRQRRKQSNRESARRSRLRKQAECDELAQRAEVLKDENATLRSEVNRIRSEYEQLLSENAS	308	373	889	MGSSEMDKPAKEKEKESKTTPPSTQEQQSATTSAGTVNPDWSGFQAYSPMPPHGFMASSPQAHPHPYMWGVQHIMPPYGTPPHPYVAMYPHGGLYAHPSMPPGSYPFSPFAMPSPNGIVEASGNTPGSIEADGKPSEGKEKLPIKRSKGSLGSLNMITGKNNELAKTSGASANGVYSKSAESGSEGTSEGSDANSQSDSQLKSGGRGDSLEGDASQNGGSAHNSQNGTPNSHTVLNPAMGMVPITAAGAPGAVTGPATNLNIGMDYWGAPSSAMPAIRGKVPATPVAGGLVTPGSRDGAQSQLWLQDERELKRQRRKQSNRESARRSRLRKQAECDELAQRAEVLKDENATLRSEVNRIRSEYEQLLSENASLKERLGEIPGHEDLRSGRSDQHLSNDT…
mrna18928	2283230	2286789	LG7	ERELKRERRKQSNRESARRSRLRKQAETDELARKVEALNADNESLKSEINRLAESSDRLRVENAS	285	350	427	MGNDDEVKSVKTEQSSSPLTADPKNHTNQTNIHVYPDWAAMQAYYGPRVPMPPYYNSPAASGHAPHPYMWGPPQTMMSPYGAPYAAIYSHGSVYAHPAVPLGSNGQGVPLSPAAANPSSVETPTKSSGNNDRGLVKRSKGFDALEMSIGNGNVENAEGEADQSLSKSSATEGSSSDGNASRANQSRRKRTREGTPTTVVAIAGDQKPEMQASPASAKDVNAASNKVLGTTVAAVGVPAKLVRPAVSPGMTTVLELKNPSSLNLASATSVQQPRAVLPPETWLQNERELKRERRKQSNRESARRSRLRKQAETDELARKVEALNADNESLKSEINRLAESSDRLRVENASLLEKLKKARVGRMEEIIMNIEDNRVEAISTENLLSRVNNSGAIARDVEEE…
mrna14556	7619838	7620746	LG1	GGGDRRHKRMIKNRESAARSRARKQAYTNDLEIRIQLLMEENERLRRENEQLSDAAASQLPKKHS	154	219	227	MEEVWKDINLASLSNANNSPNFRNMTLQDFLARPFANVVSPTPDHHHHNNNNHITLNSPPPPPPPPPPATVLSLNHLDSDQFQLFCIENLNTTRPFVNLNHPNTSTVSEKSFNGAYPFEGLGSQSSPSPGLVMPSGFGYGNERLPEPDDRSNFGGGDRRHKRMIKNRESAARSRARKQAYTNDLEIRIQLLMEENERLRRENEQLSDAAASQLPKKHSLNRSSTAPF
mrna32022	2391278	2393061	LG5	EKQLKREKRKQANRESARRSRMRKQAEYEELVKSCDSLSTEQMDLKSELDQVKVAAEKLRLENAA	120	185	272	MDQDVTKKLKGLDGHAVPISYTSSISFEENEDDLTGGADGNTPADHHMQGEKGSESLRSADTDVEVHPNYEGDTNRNFTSSSDFVQVPIGSLYENIGTSTAIFSPSAGERLPFDAMALDEKQLKREKRKQANRESARRSRMRKQAEYEELVKSCDSLSTEQMDLKSELDQVKVAAEKLRLENAALKEQLKNAQILQEGGNGSPKTEGDVTLPNDAKDILSNLGTVSSNAQLDCETHETSSETITRLNQLLESSSRTDAVAAR
mrna32024	2406307	2408214	LG5	EKQLKREKRKQANRESARRSRMRKQTEYEELVKSCDSLSTEQMDLKSELDQVKVAAEKLRLENAA	129	194	173	MTQTRISSTCPQVSIRTWGNTVFLPVECTVLELGFSLVYLRFLGTVFVGDELVAEERFELVELVVEDDLTGGADGNSRADHHTQGEKGSESLRSAVPIGSLYENIGTSTAIFSPSAGERLPFDAMALDEKQLKREKRKQANRESARRSRMRKQTEYEELVKSCDSLSTEQMDLKSELDQVKVAAEKLRLENAALKEQLKNAQILQEGGNGSPKTEGNVTLPNDGKDILSNLGTVNSNAQLDCETHETSNSETITRLNQLLESSSRTDAVAAR
mrna08757	20060912	20064855	LG2	PLDIKRIRRMVSNRESARRSRRRKQQHLQELEGQVDILRVENSTLYRQLTDASQQYRDADTNNRV	164	229	366	MERNSAAVHSHTMFGSSCGGDHLKRSPSQLDFEECLQKIARGVTAESHDRSFAETGDFFAETGDFFSGDLTFAFKNRDIMDGFSSSNGLMETLLSPQNLTPKNSSISATMDSQSSICVGTPTSAANPVGQDNQARGATSGSSGDQSDEDDFDIEAGPCGDSTDPLDIKRIRRMVSNRESARRSRRRKQQHLQELEGQVDILRVENSTLYRQLTDASQQYRDADTNNRVLKSDVEALRAKVKLAEDMVARGSLTSSFNQLLQGHLSIPQPLNPHTLRGVAHVSPTITIHGDDTSYAGIAVSGQNSGMGLGNAAGMTNSNMGTRIMSDAEEPQCRRTINKAFHLNARQGSNELSNGSNGVSNLNLAND
mrna08186	12236691	12238764	LG2	PADVKRARRMLSNRESARRSRRRKQAQMTDLETQAGQLRVENSALLKQLTDVNHKYDNSVVDRRI	212	277	425	MHSAFPADEISDISDTFWASSPSLPMNRSASEWAFEQFLEEVVSPPPPPPPPPPAASAHSSTSKREEVDEEVVEIKKPDRLQQQHLNCPPPPPSDPPSTAQINSDQYRELLKSKLNLACAAVALTRASSLKPVDSDNVAQTQSVAPQPSQLTTGLHKKGAGLPQSEADTSPLGIPALPAIQKKAQTTSGSSKDDSDDDDLEGDIEITENMDPADVKRARRMLSNRESARRSRRRKQAQMTDLETQAGQLRVENSALLKQLTDVNHKYDNSVVDRRILEANIETLRAKVKMAEESVKRKTGINPLLLAMSNVVPRASMASIGNPMDASANSSVPMQPTSNHLFHPVAPNINTPPHHQRLDTTFPGNHSIPLVGNQQRGSNTTEVPSVQHTASIDHMHQQQ…
mrna18282	18185253	18185741	LG6	LTYEKRIKRMISNRESARRSRMRKKKQIEELQHQVDQLHITNRQLSEKLIQLLEGNQHVLQENAQ	65	130	162	MQAVEVVENHSLLSLQNHTQNPDSIPFYPTRIFSMSHIHDFSSNGSSLNNDTVFDEATAAGEQGLTYEKRIKRMISNRESARRSRMRKKKQIEELQHQVDQLHITNRQLSEKLIQLLEGNQHVLQENAQLKERVSSLQVILSDLISPLQRNVEMPPPTPKST
mrna16561	19867952	19870852	LG1	PTDVKRVRRMLSNRESARRSRRRKQAHLTELETQAAQLRVENSSLLKRLTDMNQKYNEAAVDNRV	226	291	426	MDRVFSSMEEISDHLWSSSGKNEDEDEDELSKMNRSTSEWSFQRFLQQQQGSVSPSSSSQQQQQEAQNNEVEEIKVNATSMAFPNGPNHSNTSSSAASFKPPNVPVDSEEYQAFLKTKLDLACAAVALSRVKGSLVKAQDSSLADSGQQASDDLQLGSQASSQGAGNDLCRSYDKNTNAPFGIPALPTIRNRSAVPIRQATSGSSRELSDDEEVEGETAMTENMDPTDVKRVRRMLSNRESARRSRRRKQAHLTELETQAAQLRVENSSLLKRLTDMNQKYNEAAVDNRVLKADMETLRAKVKMAEETVKRLTGSNPLFHTTSDVSSISMAPFDGSPSETSTDAAVPVQDDPNHHYFQPSSNNSMPTHDFRGNNGLADNTPSVENAQQTSAATSTEVAG…
mrna09110	21186006	21189030	LG2	KVVERRQRRMIKNRESAARSRARKQAYTMELEAEVAKLKEENQELKKKQDEMMELQKNQLIDHLEF	366	432	487	MGANMNFKGFMTDFQGDGGGRPPGINNNNNSNALAREASIYSLTFDELQNSMGGPGKDFGSMNMDELLKSIWSAEETQTMVPSGVVTGGQDGYSQGHLPLQRQGSLTLPRTLSQKTVDEVWRNLSAKEENGGTAGPKAPQRQQTLGEMTLEEFLVRAGVVREDGQVGSKLGGSGFFGELARFGNGGGGGVGFGFQQPDRGSVGVMGSRISENGNQIGNLNSNMPLNANGVRSSQQQQQAPQQQPQQLQIFPKQQPVTYSTSQMALGPNSQLGSPGMRGGIMGIGEQGINNALVQSPVLQGGGGGGMGMVGLGAGNGRVAAVSPANQLSSDGIGNGKSNGTDTSSVSPMPYVFNNGFRGRKGGPVEKVVERRQRRMIKNRESAARSRARKQAYTMELEAE…
mrna04187	32467821	32468480	LG6	LINERKQRRMISNRESARRSRMRKQKHLDELWSQVVWLRNENHQLVDKLNHMSESHDRALQENAQ	94	159	219	MQPAEVTGLPYLVPSSSLSSPYSTQFSMMSTTTQSNPASAFPFNRFSATPLYNSYQFPSHLVPQEVNNNNNPQQPSSFSSNSTSDEADEQQLSLINERKQRRMISNRESARRSRMRKQKHLDELWSQVVWLRNENHQLVDKLNHMSESHDRALQENAQLKEEVSELRELLSDLQLHSPNSNYHPSLRDQLEVDVPCNTAYLRAESSNQPITTSSMDLLG
mrna02177	2775524	2778722	LG2	EEDHDRRRREKRKQSNRESAKRSRFRRQQECEKLRETAEMLNSEISELPNELRRLSEECGKLDEKTDE	154	222	304	MEIKEINNASTQVVALEIQGKEEGILYDKDLEPMPPMPQSKEGSVDIDLVGNRVAESEKETSFSGNSGVSQSAAGRGEDSSDENADTNQDFSVLQKQMFNQIDQETAVQNNSRVLYSGTNTDLNLLNIGVHMPETHLHLGMDLNVSSVHAIRTEEDHDRRRREKRKQSNRESAKRSRFRRQQECEKLRETAEMLNSEISELPNELRRLSEECGKLDEKTDEMEKMYGPDAVADLRAVKVNSSDDGSNSIESKPPRRDYSTSPTPSHRNEILPTPSHRIEASPTPLEPRLFGVTLRPNSADCLRN
mrna11666	9517923	9519899	unanchored	DKESKRLKRLLRNRVSAQQARERKKAYLSDLEVRVKDLEQKNSELDERLSTLQNENQMLRHILKN	86	151	166	MLQDQATSSLAASSLPSSSERSSSSAFQLEVKEGLESDEEIRRVPEIGGESAGASVSGREAGSLAGPDRVQVAGESQRKRGRSPADKESKRLKRLLRNRVSAQQARERKKAYLSDLEVRVKDLEQKNSELDERLSTLQNENQMLRHILKNTTASRRGGGGANAEGS
mrna15193	22518851	22519366	LG2	AIDQRKRKRMQSNRESARRSRMRKQQHLDELTAQVAQLRKENGQILTSINITTQHYMNVEAENSV	25	90	171	MATSSGNSSGSQLHNSGSEGDLQHAIDQRKRKRMQSNRESARRSRMRKQQHLDELTAQVAQLRKENGQILTSINITTQHYMNVEAENSVLKAQMAELSQRLDSLTEILNYINGNNNINSNNNGVFETEPAGQLLQTGSTAADHNSSFMMNPWNNLLYSNLPIMATADMLQY
mrna31321	14313879	14316967	LG5	KSIERRQKRMIKNRESAARSRARKQAYTNQLESKVSHLEKMNTWLKKQKEVEILLSSNPT	396	456	471	MDPTILEQCPSTVTVRRNPHRRARPLTTPATTAAGIPTPSCTVPKVPFPMEEILSMDIFNSKPDPENFRNVWPQNPRNAAREQQKKKKSPSAEVCVKVNSARSVMVSPPLALQEPNRLKSEVYNGFSHVGFGRVHMDDRTLVSGNGDEKPQFPPLAGQGSNYNLTLDRNEVESNLGNMSKPLNTRMAHLDEFLKNVISVDQEVQLLQHASSSCSSLPTSLFLGNFNLNGPLMSTTKKKITIDEVWKEIAHHDHHSLNLNSAAAHDSLHHQRMTTIGEPTTETTPPEHLLVRAGILNAHQMMPIDPEAVVSQQADWFQFQVAAAAAAQQMTMLDSNFTVCESVFENSSSAMNLDNFSENHQVGMSIPLPEISAASSSESQATHAERKRNYSDEMKEKSIE…
mrna08566	19140765	19141612	LG2	NSRHVRHKRMIKNRESASRSRARKQAYTSELELKLELLKEENARLRMQQQKFCLATPVAP	147	207	216	MTMEDVWKDISLASLCDHSSPGAAGSSATRNDPAGVRGFIFQDFMAAASTKLAPSSLATDLGPPPPANLLSLSSSGSDHFQQYQVHNSSATTSTNTSAPPNLAKPNPDSTTRPSSSLISFSNKSALEALGSSSYCKKRAVEEENGENSRHVRHKRMIKNRESASRSRARKQAYTSELELKLELLKEENARLRMQQQKFCLATPVAPATTLKRAHSM
mrna28250	20963238	20965833	LG3	KVVERRQRRMIKNRESAARSRARKQAYTLELEAEVQKLKEMNEELQKKQAEIMEMQKDQILETMNR	350	416	432	MGSNINFKNYGDVQNGDVNGGKLGGNFSLARQTSVYSLTFDEFQNTMGGLGKDFGSMNMDELLKNIWSAEETQGITSTSGAGEGNAPVGNLQRQGSLTLPRTLSQKTVDDVWKELNRESGDVKFGNVGVGSDLPQEQRQQTLGEMTLEEFLARAGVVREDAQEMARPSNSGFFGELFRHSNNNTGLAPGFQQASRNNGLLGSRVESNNNSVPHQSPNLALNVGGVRTSQQQTHQLPPQQQPIFPKPATLSFAPSMHLVSNAQLTSPRSRGPMSAVVEPSRNTAFSQGGGFPGAGIGMGGLGAGGVTVASRSPVNKISPDVIVKSSADTSSLSPIPYMFTRGRKANGALEKVVERRQRRMIKNRESAARSRARKQAYTLELEAEVQKLKEMNEELQKKQA…
mrna04504	26118964	26123785	LG4	IIDQRKQRRMISNRESARRSRMRKQKHLDELWSQVLRLRTENHSLIDRLNHVSESHDKVLEENAK	91	156	585	MLSEISGIHYLTTPEFQLPNPANFGNIIMQDNLPNSFHFNEASVYSNLFQTQIPPPGHDQLFATPMQSSSLSNNSSTSDEAEEQVQQLSNIIDQRKQRRMISNRESARRSRMRKQKHLDELWSQVLRLRTENHSLIDRLNHVSESHDKVLEENAKLKEEASDLRQMLTEIQISTALRSTELETLSNVLNSGEDVEQDEEAWLVFVWSRWLCGKLGTLKGAVLQRTRCGGCAGASLYGHSPRHPILDELVDGMKPQRVCAVADGKFDNSEGTFMVAPVILQRHCKGPMELQVQGTLQAPVDVQSSVGVDHWITFRYVEHFVIHGGGLLDGQGASAWGKSKALPTDIRHITFLNSKNTHMKIFTCNAVIISNINISAPGNSPNTDGIKVSNSNNTQISDSV…
mrna08154	1944143	1953371	LG2	KAAQQRQKRMIKNRESAARSRERKQAYQVELESMAVKLEVENEQLLREEAERTEERLKQHSHSTT	226	291	500	MASSKLISSSASSSRSRNSDLSRRPKPKPSPPSSPSAAAANQALQTTTNGGSYIHTANPAPMTVDGLFRDVYSNTLPPADAQITLMDSAGMEINSLGAAPSRPKTVDEVWEEIVSGESRRECKEELPDEMMTLEDFLARAGAVEENDVKDLHLAPPPETERLCGGLSGGMFGFDQIALSPFPSIEKMEGSIAGFGNGAAAAAAEVAASGGRGRGKRARAVLEPLDKAAQQRQKRMIKNRESAARSRERKQAYQVELESMAVKLEVENEQLLREEAERTEERLKQHSHSTTMLVDGISEWKNPTVHVGDSIIFQHKYHYNLYIFQNQGAFNVCNFTQATLLNKPDSTSYTWHPSRPGFFYFSFSNGSLLNTCQDTQKLAIRVSLTTMAPVAAPEPSSKTG…
mrna26148	8047134	8047478	LG5	LNHERRLKRLISNRESARRSRMRKKKQIQELKHEVDQLYVANNQLYEKLIRLLEVNQRILQENAE	30	95	114	MSHFNDISPYTYTVSTNTVFDETAAAEQSLNHERRLKRLISNRESARRSRMRKKKQIQELKHEVDQLYVANNQLYEKLIRLLEVNQRILQENAELKERVSSLQVTFTDLIDVTL
mrna30280	12872115	12873780	LG6	KVVERRQRRMIKNRESAARSRARKQAYTVELEAELNQLREENANLKQALTELEMKRKQQHCEEMRK	348	414	437	MGGVSESETMSHSREESPLQSDQHAKNNQLFTSLGRESSIYSLTLDEFQHTLCENGKNFGSMNMDEFLNSIWTAEENQAINSTHHNNNNNLNANHINNISSSNVQHHASSEVSTEKKGMIARQPSLARQGSLTLPAPLCRKTVDEVWSEIHRGQKAQAQQLNNNHNDSNDGAQNSEYAARQPTFGEMTLEDFLVKAGVVREPDSMSVAPLPPQPQQQPQQYGVVGQSFMMGMGANAGASTSTTPVLPNYQTIPQGGAPVGESPGYATNGKRNGVYLPPPSQAVCFGGRMVNGGGGYAPTQPIGMAAPLSPVSSDGMCASQIENSGGQHGMGMGALRGRKRIIDGPVEKVVERRQRRMIKNRESAARSRARKQAYTVELEAELNQLREENANLKQALTEL…
mrna14942	8387078	8387551	LG1	VMDLRKRKRMVSNRESARRSRMRKQEHLTDLTAQVGLLRKENNQILTSINVTNQLYLNLEAENCV	29	94	157	MATSSGNSSGSSALQIMNSGSDQEGLHQVMDLRKRKRMVSNRESARRSRMRKQEHLTDLTAQVGLLRKENNQILTSINVTNQLYLNLEAENCVLRAQVAELTNRLQSLNDIVDCIDSTKWLLDNEEEEDMTAQFGGDEFLNPWSNLCFNQPVDMFMC
mrna11837	21649533	21651655	LG5	KATQQKQRRMIKNRESAARSRERKQAYTNELEALVTKLEEENALLIMEEAERKKERLKKLMEN	193	256	277	MASSKLVSVSTANSDLPRDSSICSLSTLIADVDKHHHITMDDLLKNIYNDQPHPSPPPPDAGGASASAAAPGRTVEEVWKEIVAGGGGEGEDASADGEADHVRTGADGGGGGLAEMTLEDFLTRAGAVREEDVGVGPGTVVPMGYGQYQVQPPPPPPPRPHGQLVYANNNGTTSGGGGRGTKRRAVQEAPLDKATQQKQRRMIKNRESAARSRERKQAYTNELEALVTKLEEENALLIMEEAERKKERLKKLMENLIPIEEKRRPARVLRRVQSVHW
mrna21832	9006655	9007134	LG2	LMDQRKRKRMLSNRESARRSRMRKQKHLDDLTAQMAQLRKENHQIVSSLNITSQHYMNIEAENSV	26	91	159	MASSSGTSSVSSMIQNSGSEEDLQALMDQRKRKRMLSNRESARRSRMRKQKHLDDLTAQMAQLRKENHQIVSSLNITSQHYMNIEAENSVLRAQAAELSNRLQSLNEIITFLNANNGGCVEDSSNNNNFTEPSADCFFNPLNFSYLNQPIMASAEMFQY
mrna07844	23016779	23019186	LG3	SLDPKKLKRIYSNRVSAQKSRLKKLQYIAEMEKKAKALEAQVAVLSPQVEFFKNQSYFLQMERVA	152	217	324	MESDKNFGEISQLERVATLASSPFSMMDPSTLPLSPNLSQVWKQPYLMNHFENGESIIGAETHFQPFDTHHTATATLIPTPTTTTTTTTTPPEVEAIQDKGKKFQEESDSDANHGNGSKTVTVKTEKEETVYDTLIGGPLQIRVGRNIAPESLDPKKLKRIYSNRVSAQKSRLKKLQYIAEMEKKAKALEAQVAVLSPQVEFFKNQSYFLQMERVALNESIAARAAERLNKAAQIEANKKEVQRLRLLHLQKIEQQQMQLQASMYMNMDGVESMDQKLVNNPAGQSFEKAPQENLQNQINDAEKPDVKPSLGVAAVGGNKELKS
mrna22776	20521178	20522596	LG4	DKEYRRLKRLLRNRVSAQQARERKKVYVNDLESRAKELEDANSNLEEKISTLINENTMLRKVLMN	118	183	194	MSSSVENQQQAGSSSSSWRRFNANNSSSSPHSLHDHDKKHKLDVDSFWSRDDGDDDDDDVNPEDSDEDMFTVPDVEAIRPDDNPISTSTVTNNNATSKNDPAETGFSGKRRRGRNPVDKEYRRLKRLLRNRVSAQQARERKKVYVNDLESRAKELEDANSNLEEKISTLINENTMLRKVLMNTRPKVDDSIEQK
mrna02284	26471537	26471983	LG5	VVDDKKRKKMESNRESARRSRMKKQKHVEELTVEITRLQISNNQLRQSIDAKDKAYSELEAWNNV	16	81	148	MSSVQRQSSSGSDGCVVDDKKRKKMESNRESARRSRMKKQKHVEELTVEITRLQISNNQLRQSIDAKDKAYSELEAWNNVMRAQEKELTDRLRYLESIEQTFVEFSGGFDENMNGMAEMHDTMLNPWQIPYSTQPITASSADMFLDWP
mrna03633	24626881	24629016	LG4	DEDERRKARLMRNRESAQLSRQRKKHYVEELEDKVRAMHTTIADLNNKMSYIMAENATLKQQLSS	240	305	711	MEDSVVAGDPPIPHPDLAPNCSDSGEDFESLPIPPLDPQFFSSDAGMATMAADSFMSDLGFGFGSDDNCDYELTFDDLDNLYIPSEADDFLLPEGFDPAAQPSSDSSVILKSESPESGSSGVSKGSDGVVSGFLNYPSSESGGHDQEFSENSGGPLSSQGSGIPEAANSPTHSGNSDRDVSSNVTTADEKVKIEEEVTRSGFVAKRKKESGGGEEGNMESRSSKFRRSESSGGSGGCLDDEDERRKARLMRNRESAQLSRQRKKHYVEELEDKVRAMHTTIADLNNKMSYIMAENATLKQQLSSGSGICPPPPPPGMYPMPPMGYPWMPYSPYVVKPQGSQVPLVPIPRLKPQQPAAAPKPKKKSESKSKTKKVASISFLGLLFFLLLFGGLVPMLNVG…
mrna02614	17934548	17935024	LG2	SVDERKRRRMTSNRESARRSRGRKKRHLEDLTEEANRLKMENRELKNRLGFVAEKCHVTWRENER	64	129	158	MMSAACTSSPLFFTGADEPVQFQCPIQETELIEELLSLLQEGNSKSTSASPNSGSDGSNRGVYSVDERKRRRMTSNRESARRSRGRKKRHLEDLTEEANRLKMENRELKNRLGFVAEKCHVTWRENERLEAESLALWARLSHLNRVLFAMQTLQQSQY
mrna00517	11004800	11010969	LG6	TPDPKTLRRLAQNREAARKSRLRKKAYVQQLESSRIKLTQLEQELQRARTQGIFFGGGLVGAEQGVPVGINNI	239	312	536	MGFSRTFEEAEERAGEQHRLETKLASFMASSLQGNQLDPQQQQQQQQEHHHQSHHQIQNHHHHQQQQQQQQQQQQQQQHHHEIQYATMQPSSSNIPSVNFIGSSKDSGAYDLGELDQALFLYLDGQQQEHHHHHQAPHHVQDQRHQTSSGMRPPTLNIFPSQPMHVEPSSTKGVSTAGIVSSATSGSKRPSEPSMELANPRKIDAAAPSGPPEPAKTIKREGNRKGPTTSSSEQEGPKTPDPKTLRRLAQNREAARKSRLRKKAYVQQLESSRIKLTQLEQELQRARTQGIFFGGGLVGAEQGVPVGINNISSDAAVFDIEYARWLEEHHRLMCELRAAVQEHLPENELRLFVDNCLAHYDEVMNLKSMVAKTDVFHIFSGMWKTPAERCFMWMGGFRP…
mrna31621	14160746	14164192	LG1	KPTDKVQRRLAQNREAARKSRMRKKAYVQQLETSRLKLVQLEQELDRARQQGLYIGSGLDA	74	135	362	MNSHSTQFVTSRRMSAYEPIHQMSMWGESFMDNGSLNASASLIMDADTKLDNQSEDTSQGLLGPSSKYDQEATKPTDKVQRRLAQNREAARKSRMRKKAYVQQLETSRLKLVQLEQELDRARQQGLYIGSGLDANPLGYSGSMNSGVAAFEMEYGHWVDEQNRQISELRTALQAQISDIELRFLVDGGMSHYFELFSMKSKAAKADVFYVMSGMWKTSAERFFSWIGGFRPSELLKVLLPQLCPLADQQLLDVSSLKQSCQQAEDALSQGMDKLQLTLASAVAADHPGEGIYVPQMAIAMEKLEALVDFVNQADHLRKETLQQMSRILTIRQAARGLLALGEYFQRLRALSSLWTTRPREPT
mrna23487	314376	317753	LG4	LVDPKRAKRIWANRQSAARSKERKMRYIAELEQKVQTLQTEATSLSAQLTLLQRDTNGLTNENSE	226	291	445	MDKDKSPAHGGGLPPPSGRYSSLLPTGTTYNAKSEPSSSSSFPPLASGATAEPGHFGHGMSSESNHFSHDISRMPDYPPRKLGHRRAHSEIVTLPDDISFDSDLGVVGGADGPSFSDETEEDLLSMYLDMDKFNSSSATSSSFQVGEPSASAPQAAPAFAPATRALTTDNISICTHERPRVRHQHSQSMDGSTTIKPEMLVASSEEMSAVDSKKALSATKLAELALVDPKRAKRIWANRQSAARSKERKMRYIAELEQKVQTLQTEATSLSAQLTLLQRDTNGLTNENSELKLRLQTMEQQVHLQDALNDALKEEIQHLKVLTGQAMPNGGPMMNFASFGAGAAPAPGQQFYPNNQAMHTLLTAQQFQQLQIHSQKQQHQFQQHQLHQLQQQHMQQQQQ…
mrna31322	14329862	14332599	LG5	RSADKVQRRLEQNREAARKSRMRKKAYVQQLETSRFKLAQLELELDRTRKQAAYGGSSFGGSHMGYNGIVSSGITTFELEYGHWVEEQHR	60	150	351	MGIYEPFRQVGVWRETFSGGNSSNIGASTIVEVDSRIDNKIGFGSPEPMGPSGNDQESNRSADKVQRRLEQNREAARKSRMRKKAYVQQLETSRFKLAQLELELDRTRKQAAYGGSSFGGSHMGYNGIVSSGITTFELEYGHWVEEQHRQNIELRNALQEHATEIELRILVEGGLNHYATLFRMKADAAKADIFYLLSGIWRTSVERYFHWIGGFRPSELLNILESQLEPLTEPQSLDFYNLKQSSQQAEDALSQGMDKLQQTLAKTLEADQILSGETYGSQMAAAIEKFEALESFVSQADHLRQQTLQQMSRILTTHQAARGLLALGEYFQRLRALSSLWTARPREPPAA
mrna21797	3819942	3825963	unanchored	QLDAKTLRRLAQNREAARKSRLRKKAYVQQLESSRIKLTQLEQDLQRARAQGLLMGGCGGGFGNISSAAAIFDMEYAR	235	315	543	MAFISATCPDSSFFLEYKDENGLLRKSCMAASHRVVGDTGLSDSGPSSSNHHVPYATVLHGINAPSTSFLNQEGSTFDFGELEEAIARQVRNEEAQAPLFTGRPAATLEMFPSWPMRYHQTPRGSSKSAGGESTDSGSQVNTTTLTSKGDQTQVEPESPISKLASSSNHHHHQHQALDQNHLQFQQQLQQDMAISDTTRATTVATGAAEASKGQSAPKPNHEKRKGAGSTSENRQLDAKTLRRLAQNREAARKSRLRKKAYVQQLESSRIKLTQLEQDLQRARAQGLLMGGCGGGFGNISSAAAIFDMEYARWLEDDHRHMSELRTGLQAHLSDNDLRIVVDGYISHYDEIFQLKGVAAKSDVFHLITGLWASQAERCFLWMGGFRPSDLIKMLTQQLD…
mrna27194	23488766	23496849	LG3	PADPKRVKRILANRQSAQRSRVRKLQYISELERSVTSLQSEVSALSPRVAFLDHQRLILNVDNSA	703	768	848	MDQPPITAKTSGSDSLSSAVDLPYQSGFHNHFSSEALPGALPSGQSSPLLCPYGLYAEQISGTSFTSPRKLNLRSWLYRIKPSVTHEPFKPLRPSHGRLVSEFNDSNSFTTPTQLRWKPVDVPETPTDFVQGLYTVCGAGSSFLRHGFAIHMYTANKSMDDRAFCNADGDFLIVPQLGRLWITTECGKLNVSPGEVAVLPQGFRFAVDLPDGPSRGYVAEVFGTHFQLPELGPIGANGLAAPRDFLVPTAWFEESTRPGYIIIQKYGGELFTAKQDFSPFNVVAWHGNYAPYKYDLTKFCPFNTVLFDHGDPSVNTVLTAPTDKPGVALLDFAIFPPRWLVAEHTFRPPYYHRNCMSEFMGLIYGGYEAKADGFLPGGASLHSCMTPHGPDTKTYEATI…
mrna17796	21024931	21027123	LG6	KIDPKRVKRILANRQSAQRSRVRKLQYISELERSVTSLQAEVSVLSPRVAFLDHQRLLLNVDNSA	186	251	329	MAQLPPKVPNMTPNWPDLSHHHKMSSCFAAPNGNAGSNPCWVDEFLDFSSARRGSHRRSVSDSITFLEAPMQDECRVSGAPPEPNTTRHVEFDRFDDEQFMSMFTTDEIAAAAAAGPTGSCSNPSTPSDHNSINDDEQQQIDDGDQKKKKRDNKLKHESEEAESECKLEGQQNQNGDNKNTTGDRKIDPKRVKRILANRQSAQRSRVRKLQYISELERSVTSLQAEVSVLSPRVAFLDHQRLLLNVDNSALKQRIAALAQDKIFKDAHQEALKREIERLRQVYHQQNLKKMEDNNNNNIEQSPNSDTITTQLPDAAAADQKEQLLNVSS
mrna21344	18159896	18162420	LG7	AVDPKRAKRILANRQSAARSKERKARYISELERKVQTLQTEATTLSAQLTLFQRDTTGLSSENTE	157	222	364	MQDPANPKPDPNPAPTPDSSRAPMTTSFQDPSTTPSFRGSYHRRAQSEVHFRILDDLDLLQDPFDGPSNSFEELGSEDDLFCTYMDIEKLGSKLEDGSSGGQKVENAGGGGAASQAEAGEGSNARPRHRHSSSMDGSLESIEAKKAMAPEKLAELWAVDPKRAKRILANRQSAARSKERKARYISELERKVQTLQTEATTLSAQLTLFQRDTTGLSSENTELKIRLQAMEQQAQLRDALNDALKKELERLKIATGEALTHTDSYNLGMHHFPYSQSSFFPGQPQSGPRDSQNIQLPQYHQFQSNMQAPHQPMLGASAQSHACSDMLQQDSIGRFQGLDINNRGGSHLVKPEGPSISTGETNRRF
mrna08484	18722917	18726030	LG2	VSDPKRAKRILANRQSAARSKERKMRYIVELEHKVQTLQTEATTLSAQVTKLQRDSMGFTSENNE	384	449	534	MEGSDETSSGKQRPNSPFGSSPPASFARPNHHLDIPNFNSAQVGLPMRQLSPAPSPETTSKRLGIPPSHPNNPMRPQPPSWSLSPSGGSAHSRSLSQPAFFSLDSLPPLSPLTSYREPTASSLSDPNSADVNMEESVVNSHAQSMRSPVTDGNPFWAGDGLPPRRGHRRSNSDVPLGFSAVIQSSPQLIPIGRRASFDGKEAAKPVQLVRQGSSGDNNGELMGDRKSGGEVVDDLFSAYMNLENIDRMNSPGGEDKDLDSRASGSKNGGESSDNEVESGVNGKWSSSGFSSEKKEGGKRAAGGDAGRTVRHCRSVSMDSYMDNLNFDDELMKPLPLGSQVGQLSPSTSVDGNSAKFSMEFGSGEFNAIELKKIMESEKLSEIAVSDPKRAKRILANRQS…
mrna14220	6603475	6609797	LG7	PKDQKTLRRLAQNREAARKSRLRKKAYVQQLETSRLKLSQLEQELQRARQQGIFISSSGGDAAHSTSGNGAMAFDVEYGRWLEDQNRQINELRSAVNS	44	142	334	MADSPRTDISTDVDTDDKNQMYDRGDQYAITAAVSDSSDKSKDPKDQKTLRRLAQNREAARKSRLRKKAYVQQLETSRLKLSQLEQELQRARQQGIFISSSGGDAAHSTSGNGAMAFDVEYGRWLEDQNRQINELRSAVNSHASDAELRIIVDGILAHYDEIFRLKGTAAKADVFHLLSGMWKTPAERCFLWLGGFRSSELLKLLVNQLEPLTEQQLVGITNLQQSSQQAEDALSQGMEALQQSLAETLSSGSLGSSGSSGNVANYMGQMAMAMGKLGTLEGFIRQADNLRQQTLQQMHRILTTRQSARALLAINDYFSRLRALSSLWLARPRE
mrna21882	10291741	10300117	LG6	PGDQKTLRRLAQNREAARKSRLRKKAYVQQLESSRLKLTQLEQELQRARQQGIFISSSGDQAHS	163	228	631	MGSRTVKIGSNDGDKLVTEMPSFVTPVRMISVFSGTEGGSIRSSRISDFERLEQTLGFNIEDAVDIGRSPVYDQNTSTSRASGAKDVQFGALNKLLPQKELQPNLVAVSRSNHENWGESNMADGSPRTDTSTDDTEDKNQMIERNQMAGLLASDSSDRSKEKPGDQKTLRRLAQNREAARKSRLRKKAYVQQLESSRLKLTQLEQELQRARQQGIFISSSGDQAHSMSGNGALAFDVEYARWLEEHNKQINELRAAVNSHAGDTELRTVIDNVIAHYDDIFRIKGTAAKADVFHILSGMWKTPAERCFMWIGGFRSSELLKLLVRQLEPLTEQQVMGIYNLQQSSQQAEDALSQGMEALQQSLSETLASGSPGPSGTSGNVANYMGQMAMAMGKLGTLE…
mrna00393	12770381	12774758	LG7	KTVERRQKRMIKNRESAARSRARKQRKLQQAYTTELEIKVSRLEEENERLRKQKELEKVLPSAPPPEPKYQLRR	241	315	320	MGSQGGADGNCKQSQFQPLTRQNSIYNLTLDEVQNQLGDLGKPLSSMNLDELLKSVWSAEANQTMGMDIEGTAMVNQASLQRQASLSLTSALSKKTVDEVWRDIQQSKDNEEKRSRERQPTLGEMTLEDFLVKAGVVAEASDKKNTGGPLVGVDANVASQFPQSQWLQYPHPQYQHPQQSMMGVYIPSQPIPPPMHVGAGAVMDVPYSDNQLAMPSPLMGTLSDTQTPGRKRGNPEDIVEKTVERRQKRMIKNRESAARSRARKQRKLQQAYTTELEIKVSRLEEENERLRKQKELEKVLPSAPPPEPKYQLRRTTSAPF
mrna28103	20137924	20140111	LG3	TLDPKRAKRILANRQSAARSKERKARYIQELERKVQTLQTEATTLSAQLTLFQRDTTGLNTENTE	222	287	426	MSSTTPPPPQPEPPKPMHHHSNPNPIPIPNPNPTFLPNPKDPLFLPSPAANVKPTVISSENRAAPFTTSAATSSSSTSSSSSSSTSTMLGSLPNTNPFIRSSTSAHHHFPATTHRRAHSEVSFRLPEDLMDLSGPDPFTSSAAAAADDEEDLFSTYIDLDKLQAGASAATDDDSGGGGEKRAASRHRHSSSVDTSSTSTGVFGEVMEAKKAMPPDKLAELWTLDPKRAKRILANRQSAARSKERKARYIQELERKVQTLQTEATTLSAQLTLFQRDTTGLNTENTELKLRLQAMEQQAQLRDALNEALKKEVERLKFATGEMMNHSESFNLGMQQMPYNNNQSAYFPITQQQPGPAGHQNMQMPPFNHSQSSMPSNLHQPNSHTLSDIMQNGPVGQLQG…
mrna01680	7032009	7035473	LG2	LTDPKRAKRILANRQSAARSKERKMRYISELEHKVQTLQTEATTLSAQLTLLQRDSVGLSNQNNE	417	482	585	MGDTEEGNSDMMQRLQSSFGTSSSSILKQPLSMDQLNIPQFSSSQMRSRHFAQSFTGDTSKRMGIPPSHPNHIPPLSPYSQIPVARPINQTMGSQNFSPGPSHSRSLSQPAFFSLDSLPPLSPSPYRDSPSTSMSEVDVSMEDRDASSHSLLPPSPFGRANFSRVGESLPPRKAHRRSNSDIPFGFSTMMQQALPPIAPMRGSGSVDLSMSGTENSGMVKPAQLVKKESSWERAGDNNVEGTGERKSEGEVVDDLFSAYMNLDSIDALNSSGTDDKNGNENREDMDSSRASGTKTNCDSSDNEVESSVNESGGMQRPGLNSLTNMREGIKRSAGGDIAPTTRHFRSVSMDSFMGKLQFGDESPKLPPSPGTRPGQLSPSNSIDTNSNAFSLEFGNGEFS…
mrna03778	25445361	25454647	LG4	TGDQKALRRLAQNREAARKSRLRKKAYVQQLENSRLKLSQLEQELQRARQQGVFVGLSGDQGHS	819	883	1106	MNNVSHSSSSSSSVNSASISASDPNVGRSRSGDGSQTMAAEPSRRWRDVFWLGIFMIHLILVGGALAVLGLNRFKKSDRLNLDQYTKNYLENQKGFTEDYWPLYALAGGVGTVLGWTWLLFLGSQASHMMKIAVHILTTYLAVLSVLCFWMEQFFWGVAFAIGAGLLFLYVLAVIDRLPFTMLVLQAAVKMVWSLPEVMRVAYAFMLIMLLWMGIWSFGAAGVVALGIGDGGRWWLLVVLSVSLFWTGAVLCNTVHVIVSGMVFLVLSHGGREASSIPSKSLMKSLRYAVTTSFGSICYGSLFTAAIRSLRWKIRGVRSKIGNNECLLCCVDFLFHLVETLVRFFNKYAYVQIAVSGKSFNHSARDAWELFQSTGVEALIAYDCSGAVLLMGTLLGGLI…
mrna29159	19528026	19529501	LG5	DPVSKKRRRQLRNKDAAMRSRERRKMYVTDLEMKSKYLEGECRRLGRLLQCCYAENHALRLSLQM	153	218	320	MEFGGNLDFLDDGVDVIGEIDWDFVFEDANGLDSLQELDNAAVTAAPGASPSSSSSSTVEDAPANAESGSIDTWIGEVENMLMKDDDGSKVASEEPPKEYYENFLADILVDSPSTESPTDVDSNSNGSAESDKEKSGGSPINNDTDADADADDPVSKKRRRQLRNKDAAMRSRERRKMYVTDLEMKSKYLEGECRRLGRLLQCCYAENHALRLSLQMGNAYGRGVSGTKQESAVLVMELLLLGSLLWLLDLTCLFTLPLMPHLLLLTLNQEQAHKALEGVGPRARGGASKMILALQSQSFVKTRRCKASRTKMKYAFLVS
mrna32629	5067386	5070989	LG2	LIDPKRAKRILANRQSAARSKERKVRYANELERKVQTLQTEATTLSAQVTLLQRDTTAITAENKE	176	241	336	MEMDSNNHSFSSPTSSNDIEQMPETPHRGGSYHRRAHSDFSSFRLPNFDDLLLFDPSDLDLSSFPSPVPPRGATSTSSAAVPMPIDDSDDSSASRPRPSSSATAAHFRSLSVDSDFFDGLGFSGDAVSGKEVVGGKRPGAGGHRHSNSMDGSFDSELSLDGLKKSITPDKLAELSLIDPKRAKRILANRQSAARSKERKVRYANELERKVQTLQTEATTLSAQVTLLQRDTTAITAENKELKIRLQAMEQQAQLRDALNEKLKEEVERLKIETNQTPLGNGNPFYRGLPRQYAAPQSAMHNQLGGSQSQHQQLHMRHNQNVNGQSHPSFMDFNQRA
mrna07554	8157770	8158582	unanchored	ESGEKNSKKRPLGNREAVRKYREKKKARAASLEDEVIRLRAVNQQLMKRLQGQAALEAEIARLKCLLVD	89	158	270	MDDGELDFSNQELDFSIPNMTGELPSSCSMENIFGDFFKETDTACTHNHICNPPSGPDSAHRHTCIHVHTKILSSGASEDKAGTDDTAESGEKNSKKRPLGNREAVRKYREKKKARAASLEDEVIRLRAVNQQLMKRLQGQAALEAEIARLKCLLVDIRGRIEGEIGSFPYQKPVNPGMQNPNYSSAYVMNPCNMQCDDQLYCLQRGNDGKRGDGVAMNGQGFSGCEFENLQCFTNQDGGSMGLSGCDLGNVMLESNGSHSGTKKRKGKN
mrna11979	11640560	11645856	LG6	KEDLVLKPKRRRPSGNREAVRKYREKKKAHTAYLEEEVKKLQLLNQQLVRKLQGQASLEAEFLRLRNLLLD	73	144	535	MDDGEVETLDHAVIPKSNSSGNFHTPTSIDTLRTCLHTHTCNLPGPDAAHTHTCYHTHTQVLPSEENDGDHSKEDLVLKPKRRRPSGNREAVRKYREKKKAHTAYLEEEVKKLQLLNQQLVRKLQGQASLEAEFLRLRNLLLDFRGKIDSELGAFPFEKQYYKPGVISKEGDCELQSNVGETGIRCQIDLPCFCPPAVGLSLEAGIEASEKTMASFGGNCQSPVIECRDHPKVMASAEVLKLGQLGRVLGTRLVTVAILAYSVPLVGQQKIGRSLAPEAQSLISRSSRSQSLSVAQSLSLTSPARPPRQSASSRPVRLLSQGWIVDGGDDDVVSDLPSERVGEESGVDGGLEPRRGPRIQEIRELDEDSLLKQRSPGEASSLLCHRASSLSLFPSLKCG…
mrna30252	12653246	12656768	LG6	EKEERRIRRILANRESARQTIRRRQALCEDLTKKAADLTLENESLKMKKELALKQYQSLEETNRL	171	236	532	MVCSETTRSFPSSSAASSSSSSSSSVSVGGGEVADPMMVKEELEAAEALADLAHLAMRENSGAESAGNWGLKGKRAKKRVKSESPPTLSGSNPVPACPDLPQQDEAVIGPAQCERVCINVVAEPVKTETVMSKRIAKSEQDAELTNSTPICNTSYPSFNCTKSRRNLTEEEKEERRIRRILANRESARQTIRRRQALCEDLTKKAADLTLENESLKMKKELALKQYQSLEETNRLLKVQMSKARKAEVEETLDENMSAYVQIPSSSPTNSPFVLFNRPPFTPVFWPSVIQSSNSIQLQQVPQNPMAIPSNISLPCNGTADSSHELGNPISINGSRTPLYVIPCPWFFPQFEIGNGAQPQSSCPENKQEGAFFNNQGSASSLSRTAAQLDNNQSAFPVRL…

## Sheet: Malus domestica
Gene name	Location		Chromosome	Predicted bzip domain			Protein
	start	end		sequence	start	end	Length	sequence
MDP0000231274	28607551	28610272	chr14	ERELKRQKRKQSNRESARRSRLRKQAECEELQARVETLSNENHSLREELHRLSEECEKLTSENAN	259	323	351	MGTGEEGTPSKPSKQASTPQELPTTPSYPDWSSSMQAYYGPGGTPPPFFASTVASSTPHPYMWGAQHPMMPPYGTPVPYPAMYPPGGVYAHPSMVMTPGAPQPTPEFEGKGPDGKERASTKKPKGTAGNAGLAGGKVVESGKATSGSGNDGASQSGESGSEGSSDGSDDNANNQEYGANKKGSFDKMLADGANAQNSTGTLVQASVPGKPVSMPGTNLNIGMDLWNASPAGAGAGAAKVRGNPSGPPSAGGAEHWIQDERELKRQKRKQSNRESARRSRLRKQAECEELQARVETLSNENHSLREELHRLSEECEKLTSENANIKEELTRVCGPDLVANLEQQPGGGEGNS
MDP0000251332	13279945	13285109	chr2	ERELKRQKXKQSNRESARRSRLRKQAECEELQARVEVLSNENHGLREELHRLSEECEKLTSENTN	294	358	387	MALHYPSQVSGNTWGSTVPFSLVAPIDQFVKGHGQPSLFGDNWEEGTPPKPSKQASTAQEIPTPPSYPDWSSSMQAYYGPGGTPPPFFASTVASPTPHPYMWGAQHPMMPPYGTPVPYPAMYPPGGVYAHPSMVTTPGAPQPAPELEGKGSDGKERASTKKTKGTAGNASLAGGKAVESGKATSGSGNDGASQSGESGSEGSSDGSDDNANHQEYGTNKKGSFDKMLADGANAQNSTGAIQASVPGKPVSMPGTNLNIGMDLWNASPAGAGAAKVRGNPSGAPSAGGEHWIQDERELKRQKXKQSNRESARRSRLRKQAECEELQARVEVLSNENHGLREELHRLSEECEKLTSENTNIKEELTRVCGPDLVANLEQQPGGGEGKNS
MDP0000493795	15982839	15984782	chr7	DREMKRERRKQSNRESARRSRLRKQAETEELAQQVDVLSAENVALKSEINRLTENSATLKLENTT	134	198	278	MQAATPLNMETPTKSSGNTERGLMKKLKEFDGLAMSIGSGNVTNAEGGAAGDRKTDMQPGPVSAKEANAGTDKVLGVTIAAASIPGKVVGPAVSPGVTTVLELNNPPILNSKTTPTCVPPSCAVLPPETWIDNDREMKRERRKQSNRESARRSRLRKQAETEELAQQVDVLSAENVALKSEINRLTENSATLKLENTTLLDKLKNARAGRMEDIIMNIDDKRVQPFSTENLLSRVNNAGSIARDAEKDGDNDMYEKNNGAKLHQLLDASPRADAVAAG
MDP0000545420	73542720	73544664	unanchored	DREMKRERRKQSNRESARRSRLRKQAETEELAQQVDVLSAENVALKSEINRLTENSATLKLENTT	134	198	278	MQAATPLNMETPTKSSGNTERGLMKKLKEFDGLAMSIGSGNVTNAEGGAAGDRKTDMQPGPVSAKEANAGTDKVLGVTIAAASIPGKVVGPAVSPGVTTVLELNNPPILNSKTTPTCVPXSCAVLPPETWIDNDREMKRERRKQSNRESARRSRLRKQAETEELAQQVDVLSAENVALKSEINRLTENSATLKLENTTLLDKLKNARAGRMEDIIMNIDDKRVQPFSTENLLSRVNNAGSIARDAEKDGDNDMYEKNNGAKLHQLLDASPRADAVAAG
MDP0000138052	15981497	15984608	chr7	DREMKRERRKQSNRESARRSRLRKQAETEELAQQVDVLSAENVALKSEINRLTENSATLKLENTT	299	363	443	MGNDDDAKSAKSEKSSSPLPGDQTNHTNQTNMQVCPDWGAMQAYYGPRVALPPYYNSAMASGHPPHPYMWGPPQHMMPPYGAPYAVYSHGGVYAHPAVPLASHGQDVPSSPAAATPLNMETPTKSSGNTERGLMKKLKEFDGLAMSIGSGNVXNAEGGXEQSLSRSSKTEGSSDGSDGNTAAAXQTRRKRSREGTPATAGDRKTDMQPGPVSAKEANAXTDKVLGVTIAAASIPGKVVGPAVSPGVTTVLELNNPPILNSKTTPTCVPPSCAVLPPETWIDFCTTECNLWWLDYDXQNDREMKRERRKQSNRESARRSRLRKQAETEELAQQVDVLSAENVALKSEINRLTENSATLKLENTTLLDKLKNARAGRMEDIIMNIDDKRVQPFSTENLLSR…
MDP0000185553	3270543	3277761	chr6	EREMKRQRRKQSNRESARRSRLRKQAECDELAQRAEVLKEENNTLRSEVNQIRSEYEQLLSENAS	304	368	661	MGSREMDKPAKEKEKETKTTPATTQEQPATTSTGTVNPDWSGFQAYSPIPPHGFMASSPQAHPYMWGVQHIMPPYGTPPHPYVAMYPHGGLYAHPSMPPGSYPFSPFAMPTPNGIVEASGNTPGSMEADGKPSEVKEKLPIKRSKGSLGSLNMITGKNNELGKTSGASANGVYSKSAESASDGTSEGSDANSQSDSQLKSGGRQDSLEGDVSQNGSSAHGSQNGAPHTMLNQTMAIMPLTAAGAPGAVSGPATNLNIGMDYWGAPPSAAMPAMRGKIPTTPVSAGIVTAGSRDSVQSQIRLQDEREMKRQRRKQSNRESARRSRLRKQAECDELAQRAEVLKEENNTLRSEVNQIRSEYEQLLSENASLKQVTIQSDTDFPVLTXTLGRGLEKFLVMEI…
MDP0000197219	10520899	10523983	chr1	DREIKRERRKQSNRESARRSRLRKQAXTEELARKVEALSADNVALKSEINRLTENSXTLRLENTT	315	379	457	MGNDDDAKSVKSEKSYSPLPADQANPNNQTNLHVYPDWAAMQAYYGPRVALPPYYNSAMASGHPPHPYMWPPPQHMMPPYGAPYAVYSHGGVYAHPAVPLASHGQGGPSLPAAVTPLNMETPTKSSGNTDCGLMKKLKGFDGLAMSIGSGNVMNAXGGAEXSLSQSSGTEGSSNGSDGNTAAANQTRRKRSREGTPATVHKILSSIQPXFDTYLCSIFVPXAGEGKTDMQPGPAEEASAATDKVLGVTLAAVSIPGKLVGPAVSPGMTTALKLKNSPILNSKTSPTSVPQSCAVLPPETWIHVCLWWLEYDSQNDREIKRERRKQSNRESARRSRLRKQAXTEELARKVEALSADNVALKSEINRLTENSXTLRLENTTLLDKLKNARVGRMEDIIMNI…
MDP0000286846	17102379	17109216	chr16	ERELKRQKRKQSNRESARRSRLRKQAECDELAQRAEALKEENGTLRSEVNRIRSKYELLLSENTS	345	409	448	MGSSEMDKPSKEKEKEAKTTPASTQEQSATTSAGTVNPEWSGFQAYSPIPPHGFMASSPQAHPYMWGVQHIMPPYGTPPHPYVAMYPHGGLYAHPSMPPGSYPFSPFAMPTPNGIVEVSGNIPGSMEADGKPSEVKDKLPIKRSKGSLGSLNMITGKNNELGKTSGASANGIYSKSAESASDGTSEGSDANSQSDSQLKSGVRQDSLEGLIILFSEAVNLYLRDFTKNLYGLIAGNASQNGSSAHGSQNGAPNTHTVLNQTMAVMPITAAGAPGVVPGPATNLNIGMDYWGAPPSAAMPAMRGKVPTTPVSAGIVTAGSRDSVQSQLWLQSSSDMTFKLDWELDERELKRQKRKQSNRESARRSRLRKQAECDELAQRAEALKEENGTLRSEVNRIRSK…
MDP0000282828	1209801	1216496	chr8	LSDPKRAKRILANRQSAARSKERKMRYIVELEHKVQTLQTEATTLXAQFTLLQRDSMGLTSENNE	383	447	1166	MEGSDETGSAKQQRPNPAFGSSSFLVPKPNSNLDIPNFNPSQMGFRMSPESSKRPGIPPSHPNNHNSMPFSRPQSGSWQMGQQNLSSGSSHTRSMSQPPFFSLDSLPPLSPLTYREPSPPSLSDPNSVDVSMGESVVNSHGPSLRSPVNDSTAYWAGDGRPPRRGHRRSNSDVSLGLSAISQPSPQLIPAGRRTSLDESASGKPVQLMRQGSNGNAEGMDERKSGGEVVDDLFNAYMNLENIDQMNLSGNEDKDMDSRASGSKTNGGESSDNEVESGLNGNRNGMLRPASGLPNERREGLKRTASGDVVPNARHCRSISMDSYMDNLNFDDEPLKPLPVGQQSPSTSLDGNSAKFSMEFGSGEFNAIELRKIMENDKLAEIALSDPKRAKRILANRQSA…
MDP0000407755	4760296	4760904	chr9	LINERKQRRMISNRESARRSRMRKQKHLDELWSQVVWLRNENHQLVDKLNHVSESHDKVLEENAQ	83	147	202	MQPGEVTGLHYLAPLSSSSPYPPHFSMSTQSNATAFQFNRFSSPLYNFQFPNSQLQEINNNPQQPSSFSSSTSDEADEQQLSLINERKQRRMISNRESARRSRMRKQKHLDELWSQVVWLRNENHQLVDKLNHVSESHDKVLEENAQLKEEASELRQMVNDLQLHSPYNPFLRDLEDVPCNTAYLRTESSNPSITSSMDLLG
MDP0000270365	30191422	30194800	chr12	PADVKRVRRMLSNRESARRSRRRKQAHVTDLEGQVSQLRVENSSLLKRLTDSDKKYNEVAVDNRV	232	296	437	MDRVFSVEEEMSDLLWSSTAPPDNGGADDDNLSKLNRSASEWAFQRFLQEASXYSPSPSPTPPPPPHPSSSSSTAHHHDQNDVEEIKMINAHHHNATHTHYNNMRPPNVTVDSDEYRAFLKTKLDLACAAVAMSREGSLVKAQESAVLADSGSHASSTSQLGSEAPSKGAGYDXSRSNDKNAHAXLGXIPSLPXTKYRSAIPVRQATSGSSREMTDDEEAEGETAMNENMDPADVKRVRRMLSNRESARRSRRRKQAHVTDLEGQVSQLRVENSSLLKRLTDSDKKYNEVAVDNRVLKADIETLRAKVTMAEEMVKRFTGSNPMFHAMSEVSSIGMPPFDGSPSEASIDAAVPEQDDPNHHFFQPASNNPIPTHDPRVKNDSADVPSVENVQKNSAATS…
MDP0000239026	24590229	24590711	chr11	LMDQRKRKRMVSNRESARRSRLRKQKHLDDLTGQINQLKKENHQIISSLNITSQHYMNMEAENSV	28	92	160	MAPSSGTSSGSSSMSHQNSGSEEDLMALMDQRKRKRMVSNRESARRSRLRKQKHLDDLTGQINQLKKENHQIISSLNITSQHYMNMEAENSVLRAQADELSSRLQSLNEIASFLNANNGGLYAAAADSSCFNEPNSSFFDPLNLSNLNQPIMASADMFHY
MDP0000680042	4062791	4065343	chr15	PLDIKRIRRKVSNRESARRSRRRKQAHLADLESQVEQLRGENSTLYRQLTDAFQQFRDADTNNRV	155	219	327	MEQKPRFHVEVHSXTASSPFELKRSPSEVCLGEALEYLLEKPMIGQEAADTQGHRDEKIGELRARDRGFADTDVFFGDVCAGDHSFGFQNRVSHTQPLTLRDFRTPGSMGSPTSAAKPIGGDNQARGAYSGSSGEQSDEDDFEIEVSPCGDSTEPLDIKRIRRKVSNRESARRSRRRKQAHLADLESQVEQLRGENSTLYRQLTDAFQQFRDADTNNRVMKSDVEALRAKVKLAEDMVARGSMTSNLNQILQGHLGTPQPLNPQNFRGVATHVSPTITIHGEDAPYAGIAVSGQNASFGLGNAGMANSNLSNRMMSDTVSCVSDMWS
MDP0000239688	14476695	14489099	chr14	ERQMKREKRKQANRESARRSRLRKQAEYEELVKTCESLNAEKMALQSKIKKLKEDSETLRLENAA	444	508	854	MHSRPSHNRLSGSAFHSRISALLLAMVSTMAAIYVAGRLWQDAADRVYLIQELDKRNGQGQSAIAVDDTLKIIDCREQQKQLSALEMQLAGARQEGFIPKSLSKNEGAHSKKKLVAVIGIITTFGRKKNREAIRKAWMPTGEALKRLADEKGIIVRFVIGRSPNRGDSLDKEIDKENDRTNDFIILDDQVEASEERPKKTKLLYIHAVENWDAEFYVKVNDDVYVNLDVLGATLTTYIDKPRVYIGCMKSGEVFSEPTHKWYEPDWWKFGDAKSYFRHASGELYAISRALAQFISINRSILHAYAHDDVSAGSWFIGLDVKHIDERKFCCSSWMPDRYNIEKRRPREGDHRPMSLHAEHFTQRNNGSESMQSAENDVKVHTQVSPTTKGETNENSKSVS…
MDP0000891899	3386464	3387078	chr13	VIDERKHRRMISNRESARRSRMRKQKHLDELWSQVVRLRNENHSLIDRLNNLSESHDMVVEENAR	81	145	204	MLPGEIISGLHYFEPEIPLXNPSDFAFMQNQIPSLHFNTSFNNLSRQIAPPIGHDFTQQSSSLSNNSSTSDDAEEHHHLRVIDERKHRRMISNRESARRSRMRKQKHLDELWSQVVRLRNENHSLIDRLNNLSESHDMVVEENARLKEEACDLRQMLTNLQIGSPYNINASTFRELEGEVPCNTAHLRAESSNQSIAASADLLH
MDP0000586302	17051287	17053624	chr12	DKESKRLKRLLRNRVSAQQARERKKAYLNDLEVRVKELEQKNSELDERLSTLQNENQMLRHILKN	85	149	164	MQEQATSSLAASSLPSSSERSSSSAFHLEVKEGMESDEEIGRVPEIGGESAGASASARENGLLAGPDQVQTAGESQRKRGRNPADKESKRLKRLLRNRVSAQQARERKKAYLNDLEVRVKELEQKNSELDERLSTLQNENQMLRHILKNTTASRRGXDGGANAD
MDP0000176747	19745441	19751773	chr10	PSDVKRARRMLSNRESARRSRRRKQAQMSELETQVGQLRVEHSGLLKRLTDVNQKYDNAAVDNRI	627	691	869	MAAASSLKSAAGFLQLKKPQNPLLLSSPNQVSTISTKKFAPIAALTATPVVSLSQTFINLKDQGKVAFIPYITAGDPDLSITAEALKVLDSCGSDIIELGVPYSDPLADGPVIQAAATRSLARGTNLNAIISMLKEVIPQLSCPIALFTYYNPILKRGIPEFMSTIKDVGVHGLVVPDVPLEETEILRKEAAKNNIELVLLTTPTTPIDRMKAIAEASEGFLYLVSSIGVTGARASVNERVPALLKEIKETTKRPVAVGFGISKPEHAKQVAGWGADGVIVGSAMVKLLGEAKTPEEGLKELATFTNQKLALILCYTGHHINYSAHDTWQIHTNQRWPPEKVPVHNYYSVPYITRIFLYFVRSPIYKHESSHLVDENNKYRIFRTRTRAQSMHSVFTAD…
MDP0000701734	13223842	13234772	chr8	KVVERRQRRMIKNRESAARSRARKQAYTTELEAEVAELKEENQELLKKQAEMVEMQKNQQDLEIINLQ	561	628	643	MASLSRSPPLLLRHINSLTLHPCPLTLSFPFLNTTLPHPRPCALXTGPDGGSRIGRPGTQGPDPGLLRKPVVSSGKDMDGISEEDGGEXGKWVDWEDKILEDTVPLVGFVRMILHSGKYESGDRLSPEHQKTVLERLLPFHPEAKKKIGSGIDYITIGSITVDNQQLSRIIIVCSKSSDKDIERISILPTLSVSCHHWGDPQPISAKCQANDRRTNKPKISQKMGXNMNFKGFGNEPLIARQSSIYTLTFEELQNTIGGSGKDFGSMNMDELLKSIWTAEETQIIAPAAGGAGGQDGLDHGSGGSLQRQGSLTLPRTLSQKTVDEVWKNLSKEGTGAGGSNMPQRQPTLGEMTLEEFLFRAGVVREDAQVAPKPNGAGFFGDLSRFGNSGSLEFEFQQP…
MDP0000917315	22353119	22353583	chr6	ERDMNYERKLKRMISNRESARRSRMRKKKQIEELQYQVDQLHSTNRQLSEKLIQLLEGNQQILQENAQ	45	112	154	MELKESMPINPTRFFHISHIHVPTHGFSANTSSLGNEAAFGEAGERDMNYERKLKRMISNRESARRSRMRKKKQIEELQYQVDQLHSTNRQLSEKLIQLLEGNQQILQENAQLKERVSSLQIILADLIAPLRIEGDVTVNTNGNQLTAEDSSTP
MDP0000215106	4115354	4119277	chr7	KTVERRQKRMIKNRESAARSRARKQAYTNELENKVSRLEEENERLRKQKFYEPSKYQKNS	243	302	408	MGSQGGADGNCKQPQFQPLGRQNSMYSLTLDEVQNQLGDLGKPLSSMNLDELLKNVWSVEANQTMGIDIEGTTLVNQAQLQRQASLSLTSALSKKTVDEVWRDIQQSKDEEEKKSQERQRTLGEMTLEDFLVKAGVVAEAEASSDKQCAGPLVGVDANVAAQFPQGQWMQYSQPQYQHPQQSMMGVYMPSQPIPPPMHVGAGAMMEVPYPDNQVPLPSPLMGALSDTPTPGRKRGNPEDIVEKTVERRQKRMIKNRESAARSRARKQAYTNELENKVSRLEEENERLRKQKFYEPSKYQKNSFWPVPVFGLYYGLVQMIKCKTVWIFLKDFHEHFKGLSLKDRKTKTKLLLLPALPMNVLTTSSTLNIGIVSCSLNAFVDKQELEKVLPSAPPPEPKYQ…
MDP0000905135	26993073	26993594	chr14	EPDMNYERKLKRMISNRESARRSRMRKKKQIEELQYQVDQLHSTNRQLSEKLIQLLEGNQQILQENAQ	64	131	173	MEPNESKGTRYLPNHCLPTHPHPDSLPIYPPRFFPVSHIHVPAHDFSPNASSLSNEAAFNEAGEPDMNYERKLKRMISNRESARRSRMRKKKQIEELQYQVDQLHSTNRQLSEKLIQLLEGNQQILQENAQLKERVSSLQIFLADLITPLRNAGDVTVNTSGNQLRAEDSSTP
MDP0000264514	17054996	17059849	chr12	DKESKRLKRLLRNRVSAQQARERKKAYLNDLEVRVKELEQKNSELDERLSTLQNENQMLRHILKN	154	218	233	MATSARSASTFRRQGSSGLIXXDKPPXPFCPNQEPTFFQKQILXRSHTIARALFRKSTTPACGEDMVVEMQEQATSSLAASSLPSSSERSSSSAFHLEVKEGMESDEEIGRVPEIGGESAGASASARENGLLAGPDQVQXAGESQRKRGRNPADKESKRLKRLLRNRVSAQQARERKKAYLNDLEVRVKELEQKNSELDERLSTLQNENQMLRHILKNTTASRRGXDGGANAD
MDP0000275309	14238089	14245492	chr5	PSXVKRARRMLSNRESARRSRRRKQAQMSELETQVGQLRVEHSGLLKRLTDVNQKYDNAAVDNRI	559	623	799	MAASSSLKFAAGFLQLKKPQNPLLLRSPNQVSTLSTKKFAPMAALTATPAVSLSQTFINLKEQGKVAFIPYITAGDPDLSITAEALKVLDSCGSDIIELGVPYSDPLADGPVIQAAATRSLARGTNLNAIISMLKEVIPQLSCPIALFAYYNPILKRGIPEFMSTIKDVGVHGLVVPDVPLEETEILRKEAVKNNIELVLLTTPTTPIDRMKAIAEASEGFLYLVSSIGVTGARASVNERVPALLKEIKETTKKPVAVGFGISKPEHAKQVAGWGADGVIVGSAMVKLLGEAKTPEEGLKEVRXSSTQPTKNWIFRTFTPAQSMHSVFTADDSSDTFWALSSPAEMNRSASEWAFEQFLDEFTTPAATPRQSVAEQFPVSSAASCSVASQSSTSKRDDV…
MDP0000863909	5338915	5339523	chr17	LINERKQRRMISNRESARRSRMRKQKHLDELWSQVVWLRKENHQILEKLNHVSESHEKVLQENAQ	83	147	202	MQPGEVTGIHYLVPSSSSSPYPPFSMSTQSNATAFEFNRFSSPLYNFQYPTSQLQEXNNNPQQPSSFSSNSTSDEADEQQLSLINERKQRRMISNRESARRSRMRKQKHLDELWSQVVWLRKENHQILEKLNHVSESHEKVLQENAQLKEEXSELRQMLNDLQLHSPYHPSLRDLEDVPCNTAYLRAESSNQSITSSXDLLG
MDP0000205823	2303356	2303835	chr8	LMDQRKRKRMISNRESARRSRMRKQKHLDDLTGQISQLQKDNEQIISSLNITSQHYMNVEAENSV	28	92	159	MASSSGTSSGSSSMIHQNSCSEEDLTALMDQRKRKRMISNRESARRSRMRKQKHLDDLTGQISQLQKDNEQIISSLNITSQHYMNVEAENSVLRAQADELSNRLQSLNEIASFLNANNGGLHAAAADSSCFAEPHDSFFNPLNLSYLNQPIMASAEMFY
MDP0000891108	6132321	6132899	chr8	VIEERKQRRMISNRESARRSRMRKQKHLDELWSQVVRLRNENHSLIDRLNNVSESRDRVVEENAR	81	145	192	MLPGEIISGLHYFESEIPLRNPSDYAFMHNQIPSHHFNTLFNNLSHQIPPPPGHDFTQQSSSLSYNSSTSDDAEEHHHLRVIEERKQRRMISNRESARRSRMRKQKHLDELWSQVVRLRNENHSLIDRLNNVSESRDRVVEENARLKEESSDLRQMLTNLQIGSPYNINASTFRELDSDVPCITAHLRTFEH
MDP0000248567	27744402	27746779	chr5	KVVERRQRRMIKNRESAARSRARKQAYTLELEAEVAKLKEMNEELQKKQEEIVEMQKDQMLETMKR	349	414	431	MGSNFNFKSFGEAPPVEGNGGRAGGSFGLARQSSVYSLTFDEFQNTIGGLGKDYGSMNMDELLKNIGTAEETQGMTATSGVGREVNAPGGNLQRQGSLTLPRTLSQKTVDEVWKNLIRETTDDKYNNVAAGSNLPQRQQTLGEMTLEDFLVKAGVVREDIQPPVVRPNNGGFYGELYRPNNNVGLASGFQQPNISNGILGNRVADNKNSVPIQSPTLALNVGGVRTSQQQTLQLPPQQQPLFPKPTTVAFAPSMHLVNNAQLSIPRTRGPMAGVVEPSINTAFSQAGGFPGAGIGAVGLGTGGGAVATRSPANQISPDVIAKSSGDTSSLSPVPYMFNRGRKCSGAVEKVVERRQRRMIKNRESAARSRARKQAYTLELEAEVAKLKEMNEELQKKQEE…
MDP0000273211	30554835	30560990	chr2	KTVERRQKRMIKNRESAARSRARKQAYTNELENKVSRLEEENERLRKQKEQEKVLPSA	243	300	535	MGSQGGADGNCKQSQFQPLARQNSIYSLTLDEVQNQLGDLGKPLSSMNLDELLKNVWSAEANQIMGIDIEGNTLVNQAQLQRQASLSLTSALSKKTVDEVWKDIQQSKDEEEKKSQERQRTLGEMTLEDFLVKAGVVAEAEASSDKKYADPLVGVDGNVAVQLPQGQWMQYPQPQYQHPQQSMMGVYMPSQPLXPPMHVGAGAMMEXPYPDNQVAVPSPLMGTLSDTQTPGRKRGNPEDIVEKTVERRQKRMIKNRESAARSRARKQAYTNELENKVSRLEEENERLRKQKEQEKVLPSAPPPEPKISPRPFLAMFFAGVRVWVLVLVSTEXIGLITFLSWVILALPHXGRHRLLLHGVSEIASERLPIWPQRVGPTAVKRKQQALKNLIKTPSRNAIT…
MDP0000208334	2137715	2141599	chr10	KASQQRQKRMIKNRESAARSRERKQAYQDELESLAVRLEEENEQLLKEQAEQTQXRLKQLMENII	230	294	314	MASSKLMSSSSSSRSRNSDLSRRPSSNFSPATKPQPTTTTAHPSSSSAHPQSLNNYQNSNTSTTXAFPIGSITVDGLLYDSNPTPMTDATLLNAQITLLDSSAEINSSTAPPXPKTVDEVWREIVSGECRKECKEEVPDEMMTLEDFLARAGAVEENDIKDFPLAPPPPETERLSSGVFSFDQIPLSPFGSIDKVEGSIVGFGNXADPAGSGGGVGRRKRGRAVMEPMDKASQQRQKRMIKNRESAARSRERKQAYQDELESLAVRLEEENEQLLKEQAEQTQXRLKQLMENIIPVVEKRRPPHVLRRVRSLQW
MDP0000183562	1860154	1861757	chr16	VIEERKQRRMISNRESARRSRMRKQKHLDELWSQVVRLRNENHSLIDRLNNVSESRDRVVEENAR	81	145	360	MLPGEIISGLHYFESEIPLRNPSDYAFMHNQIPSHHFNTLFNNLSHQIPPPPGHDFTQQSSSLSYNSSTSDDAEEHHHLRVIEERKQRRMISNRESARRSRMRKQKHLDELWSQVVRLRNENHSLIDRLNNVSESRDRVVEENARLKEEXSDLRQMLTNLQIGSPYNINASTFRELDSDFFIILQSTSPPSYINXANRLVFITLILQSTSPPSDINLANRGVFITLKMDALEHDKRDKEKGMYSAGCTQEFALLAAYTTVKCTCSCSEPETNSGNRRKTRSGGGGGGASGGSSCKNVGLLCENKTFEKPNQASIIAFVNEFECPAKKADASGAASTVDLPFYXALLEHTHMHLPYIMQHY
MDP0000296303	2474633	2485694	chr15	KVVERRQRRMIKNRESAARSRARKQAYTMELEAEVAKLKEENQELQXKQAQMAEVQKNQDMEILNLQ	754	820	835	MKHIRVAGSSSSYISVFSLFKADFQLIDXNAHEMEANNVRNKNLASSIQGKLQQQSPLRSHHSIFRVPNVLRNDNERVYVPRLISIGPLHRGSKLQTMEGIKLWYLHCLLQRDQTRKTGLEHFVEAIRDIEQDCRDSYEEQIDMSSDDFVEMLVVDGCFIIELFRKSSGEVPTKEEDPVFHKSWIHTPLINDLLLLENQLPWIVLDRLFDLTLETSAGNNNHISLPEITLRYFEVYSLGMLSRTYRASGSKHLLDFIRNSLIGWYQSDDAHMPLSLFKIPSATELAGSGIILTTGRKYDGMLNITFEXXVLRIPPIRVCKNGESLFRNLVAYEQCETTTGVSKYASYAVLLDHLIKSKEDVELLVKRGVIENFXDDMAWLLNNLSNGIIVYNFTYRRIY…
MDP0000200822	11591288	11591746	chr8	TVDERKRRRMTSNRESARRSRWRKKRHLEDLTSEVDRLKIENQELKNRLGLVAQKCHVLWRENDR	60	124	152	MMMSSSAMSFIHEPADMGRFECPVQETVLTTAEIQELLSLLQAGNSASPSSEGSNREVDTVDERKRRRMTSNRESARRSRWRKKRHLEDLTSEVDRLKIENQELKNRLGLVAQKCHVLWRENDRMTSESLALRARLSDLYRILIAMQTQYSQ
MDP0000521934	1641214	1641684	chr8	LVDQRKRKRMQSNRESARRSRMRKQQHLDDLTAQVAQLRKENNQILTSINITTQHXMNVESENSV	26	90	156	MASSSGNSSGSTQLQNSGSEGDLHHLVDQRKRKRMQSNRESARRSRMRKQQHLDDLTAQVAQLRKENNQILTSINITTQHXMNVESENSVLKAQMAELSQRLESLNEILGYIXAGXGYGGDFETTPXADHNSFINPWNMLYVNQPIMATADMLHQY
MDP0000140166	11589213	11589767	chr8	TVDERKRRRMTSNRESARRSRWRKKRHLEDLTSEVDRLKIENQELKNRLGLVAQKCHVLWRENDR	92	156	184	MCILSFDYKYSTPPLRSFPFFSSFPPPLPFTQMMMSSSAMXFIHEPADMGRFECPVQETVLTTAEIQELLSLLQAGNSASPSSEGSNREVDTVDERKRRRMTSNRESARRSRWRKKRHLEDLTSEVDRLKIENQELKNRLGLVAQKCHVLWRENDRMTSESLALRARLSDLYRILIAMQTQYSQ
MDP0000706379	27911843	27914522	chr8	KATQQKQRRMIKNRESAARSRERKQAYTVELESLVTQLEEENARLLRQQAEQKKXRFKQLMENLI	215	279	299	MATSSKMAVVSTANSDLPRRESSICSLSTFLADDDDNRHHKHQSMTMDDILRNIYSSTGTGTGNDMXDNGHHQQLHHHAEARSVDEVWKEIVAGGAGVGVGVGEEEVGVAEGDGGDQVRGGEGGGGGGGGMEEMTLEDFLTRAGAVREEDVSVNAGGVPIGYGQFQVQPPPPPXAAQGQLVYANGTTSASGGGGGGGGGGRAGKRRAVQEAPLDKATQQKQRRMIKNRESAARSRERKQAYTVELESLVTQLEEENARLLRQQAEQKKXRFKQLMENLIPVVEKRRPPHVLRRVHSVHW
MDP0000231542	8917835	8924220	chr4	KVVERRQRRMIKNRESAARSRARKQAYTVELEAELNHLREENSHLKQALAELERKRKQQYFEEMK	354	418	1017	MGVLESEINSHGEVDSPLLSDQQAKNHLFSSLGRQSSIYSLTLDEFQHTLCESGKNFGLMNMDEFLTSIWTAEENQAINSNLTNTTTTNXNNNMNNIEVHXPLAEASAEKSIATQPSLPRQGSLTLPEPLCRKTVDEVWSEINXGQQAKQQNNHNSSIDGXVQSSEFAPRQPTFGEMTLEDFLVKAGVVREQDSMAATVVPPQPHQQQRYGMYQNGNHAVGPSFVNRPVMGMGAAAAAGASTSTAAGIPNYQTIPQSGAAVVGESSAYAANGKRNGAYPGVXPPQSVCFGGRVENGGGGYAAGQTIGMAAPGSPVSSDGMGTSQVENSAGRFGLDMGLDGLRGRKRGLDGPVEKVVERRQRRMIKNRESAARSRARKQAYTVELEAELNHLREENSHLK…
MDP0000138811	1379763	1383691	chr7	DEDDKRKARLIRNRESAQLSRQRKKHYVEELEDKVRAMHSTIADLNNRISYVIAENATLKQQLSS	228	292	741	MALPAEPHSGHNSTNHPDRTDFKFNSDMESLGIPPLDPEFFSSDNGMAAGAVPSDDPFMSDLGFGFGDDGNCEFELTFDDLDDLYLPSEAEDFLVPDGLDPSAAALNSGSPESGSSAISVSGDDKGALDISRFLNCPASSNECSENSDGPASSQGSGISEAVDSNSHSGNSDDEKVKVEDELAKNYLVKRKKESDEGNAESRSAKYRRSENNNNNNAASVNVSASANDEDDKRKARLIRNRESAQLSRQRKKHYVEELEDKVRAMHSTIADLNNRISYVIAENATLKQQLSSPPPPSHLGMHXHPPMPPMPYPWMPYSPYVVNPQGSQSLLVPIPRLKSQQPAAAPKSRKSDSKKSEGRTKKVASVSFLGLLFFILLFGGLVPMVNVNFSDVMDRGFGG…
MDP0000299504	1372519	1376449	chr7	DEDDKRKARLIRNRESAQLSRQRKKHYVEELEDKVRAMHSTIADLNNRISYVIAENATLKQQLSS	228	292	741	MALPAEPHSGHNSTNHPDRTDFKFNSDMESLGIPPLDPEFFSSDNGMAAGAVPSDDPFMSDLGFGFGDDGNCEFELTFDDLDDLYLPSEAEDFLVPDGLDPSAAALNSGSPESGSSAISVSGDDKGALDISRFLNCPASSNECSENSDGPASSQGSGISEAVDSNSHSGNSDDEKVKVEDELAKNYLVKRKKESDEGNAESRSAKYRRSENNNNNNAASVNVSASANDEDDKRKARLIRNRESAQLSRQRKKHYVEELEDKVRAMHSTIADLNNRISYVIAENATLKQQLSSPPPPSHLGMHXHPPMPPMPYPWMPYSPYVVNPQGSQSLLVPIPRLKSQQPAAAPKSRKSDSKKSEGRTKKVASVSFLGLLFFILLFGGLVPMVNVNFSDVMDRGFGG…
MDP0000144105	1963619	1966105	chr12	KVVERRQRRMIKNRESAARSRARKQAYTVELEAELNQLREENSHLNQALAELERKRKQQYFEEMK	348	412	470	MGVSESEIISQGKVDSPLLSDQQEKNQLFSSLGRQSSIYSLTLDEFQHTLCESGKNFGSMNMDEFLTSIWTAEENQAINSNHTNTSTTNNNTNNIEVHMPLADASADKHIATQPSLPRQGSLTLPAPLCRKTVDEVWSVIHKGQQAKQQNNHNGSIDGGVQSSEFAPRQPTFGEMTLEDFLVKAGVVREQXSMAATVVPPQPQQQQQYGMYQNGNQAVVPSFVNRPVMGMGAAGAAGTSTATGIRNYQTIPQSGSAVVGESSAYAANGKRNGAYPTVPPPQSVCFGGRVVNGGDGYAAGQTIGMGALVSPVSSDGMGTSQVENSGGQFGLEMGGLRGRKRGLDGAVEKVVERRQRRMIKNRESAARSRARKQAYTVELEAELNQLREENSHLNQALAEL…
MDP0000177486	1946497	1948984	chr12	KVVERRQRRMIKNRESAARSRARKQAYTVELEAELNQLREENSHLNQALAELERKRKQQYFEEMK	348	412	470	MGVSESEIISQGKVDSPLLSDQQEKNQLFSSLGRQSSIYSLTLDEFQHTLCESGKNFGSMNMDEFLTSIWTAEENQAINSNHTNTSTTNNNTNNIEVHMPLADASADKHIATQPSLPRQGSLTLPAPLCRKTVDEVWSVIHKGQQAKQQNNHNGSIDGGVQSSEFAPRQPTFGEMTLEDFLVKAGVVREQXSMAATVVPPQPQQQQQYGMYQNGNQAVVPSFVNRPVMGMGAAGAAGTSTATGIRNYQTIPQSGSAVVGESSAYAANGKRNGAYPTVPPPQSVCFGGRVVNGGDGYAAGQTIGMGALVSPVSSDGMGTSQVENSGGQFGLEMGGLRGRKRGLDGAVEKVVERRQRRMIKNRESAARSRARKQAYTVELEAELNQLREENSHLNQALAEL…
MDP0000448715	21746621	21747094	chr12	PVDQRKRKRMQSNRESARRSRMRKQQHLDDLMAQVAQLRKENNQILTSINITTQHFMNVESENSV	26	90	157	MASSSGNSSGSAQLQNYASEGDLHRPVDQRKRKRMQSNRESARRSRMRKQQHLDDLMAQVAQLRKENNQILTSINITTQHFMNVESENSVLKAQMGELSQRLESLDEILGYINGGVGHGGGLETTPVADQNSFINPWNMLHVNQPIMATADMLHQYY
MDP0000431572	31289060	31292057	chr13	PLDIKRIRRMVSNRESARRSRRRKQAHLAELELQAEQLRRENSTLCXQLTDASQQFRDADTNNRV	175	239	346	MEQXPACDVSVHSQTASSPFELKREFSLGEALEYLMDKSMIGQEGADTQGHQXEKMDEYWAKYRNFASADVFXGDVCAGDLSFAFKNEDIMDGFSSFGELTETLLCTQNLTPKNSCISATMDSQSSICVGCPTSAAKPIGRDNQARGAYSGSSGEQSDEDDFEMEFGPCGDSTDPLDIKRIRRMVSNRESARRSRRRKQAHLAELELQAEQLRRENSTLCXQLTDASQQFRDADTNNRVLKSDVEALKAKVKLAEDLVARVSITSSLNQILQGHLGTPQPLNPHNVRGVAAHVSPTITVHGQDAPYAGIAVSGQNAGLGLGNAGMANSNLSNLMMSDTVSCVSDMW
MDP0000441891	31289069	31292136	chr13	PLDIKRIRRMVSNRESARRSRRRKQAHLAELELQAEQLRRENSTLCXQLTDASQQFRDADTNNRV	175	239	346	MEQXPACDVSVHSQTASSPFELKREFSLGEALEYLMDKSMIGQEGADTQGHQXEKMDEYWAKYRNFASADVFXGDVCAGDLSFAFKNEDIMDGFSSFGELTETLLCTQNLTPKNSCISATMDSQSSICVGCPTSAAKPIGRDNQARGAYSGSSGEQSDEDDFEMEFGPCGDSTDPLDIKRIRRMVSNRESARRSRRRKQAHLAELELQAEQLRRENSTLCXQLTDASQQFRDADTNNRVLKSDVEALKAKVKLAEDLVARVSITSSLNQILQGHLGTPQPLNPHNVRGVAAHVSPTITVHGQDAPYAGIAVSGQNAGLGLGNAGMANSNLSNLMMSDTVSCVSDMW
MDP0000180785	35007856	35011943	chr2	GEEEKRKARLMRNRESAQLSRQRKKHYVEELEDKVRAMHSTIADLNNRISYVMAENATLKQHLSS	237	301	755	MALPAEPHAGPDSANHPDHIDFKFNSEMESLPIPPLDPEFFSSDNCMASAAVTSDEFMSDLGFGFGPDDNCDFELTFDDLDKLYLPSVTEDFLLPDGLDPGAAESNSGSPESGSSAIMVSGDDKGGLDVSRFLNCPASSNECSENSGGPASSQGSGISEAVDSHSGNSGNSVTVSSNAICSSDDEKVKEEDEMAKNYLVKRKKDSDEGNVESRSAKYRRSDNNNNSASVNVGANANGEEEKRKARLMRNRESAQLSRQRKKHYVEELEDKVRAMHSTIADLNNRISYVMAENATLKQHLSSGGTMCPPPPPHLGMHPHPPMPPMAYPWMPYSPYVTKPQGSQSLLLPIPRLKSQQPAAAPKSKXSESKKSEGRTKKVASISFLGLLFFILLFGGLVPMV…
MDP0000270677	35004195	35008282	chr2	GEEEKRKARLMRNRESAQLSRQRKKHYVEELEDKVRAMHSTIADLNNRISYVMAENATLKQHLSS	237	301	755	MALPAEPHAGPDSANHPDHIDFKFNSEMESLPIPPLDPEFFSSDNCMASAAVTSDEFMSDLGFGFGPDDNCDFELTFDDLDKLYLPSVTEDFLLPDGLDPGAAESNSGSPESGSSAIMVSGDDKGGLDVSRFLNCPASSNECSENSGGPASSQGSGISEAVDSHSGNSGNSVTVSSNAICSSDDEKVKEEDEMAKNYLVKRKKDSDEGNVESRSAKYRRSDNNNNSASVNVGANANGEEEKRKARLMRNRESAQLSRQRKKHYVEELEDKVRAMHSTIADLNNRISYVMAENATLKQHLSSGGTMCPPPPPHLGMHPHPPMPPMAYPWMPYSPYVTKPQGSQSLLLPIPRLKSQQPAAAPKSKXSESKKSEGRTKKVASISFLGLLFFILLFGGLVPMV…
MDP0000740787	29978607	29983162	chr10	VVVERRQRRMIKNRESAARSRARKQAYTVELEAELNQLKEENTRLKQSVVLRRKEIKQSTRAQKL	439	503	517	MSSYGRDEEACLLPTTTITIIIAVTVFTITINTMATAITTTITTTATMIVAGILSPLLSLQPTITPTITTIAMVTIVVITPTIIASNSATFPQKKTGMWHRTCPATAQQCGVHTRKRTPVKYKSGSGNDSGSYACRLSSLLPFKSPPGDALCGSIVADHPQSGSDGYDHNGNDNMELDLPLEQQEGLSKDSSHPSMNSTKHNSIFSLTLDEIQCKSGRNFGSMNMDEFLANIWSVEEDQEPSKGDQDSANEKDTTFQPKTLSRQGSFCIPTPLCKKTVDEVWSEIDKSRPRFHDPSSSIGSSGPSGPPQRQQTIGEITLEDFLVKAGVVQESPSKSKPSEKRVASTPIQLHCGNRFDADFGIGGQVFASAFLNPQNAMENELFSGNGYPIGTTYPMFGT…
MDP0000265875	12713645	12714118	chr2	VMDQRKRKRMLSNRESARRSRMRKQEHMTDLTAQIGLLMKENNRIITSMNVTNQLYMKIEAENSV	26	90	157	MASSSGVSSESSKLQNSGSDADLNLVMDQRKRKRMLSNRESARRSRMRKQEHMTDLTAQIGLLMKENNRIITSMNVTNQLYMKIEAENSVLRAQMDELTNRLQSLNDILDCINSSKWIYEEEENHNIIGGGEGFLNPWSAGFLNNQPIMASADMFMC
MDP0000249561	12516047	12516520	chr2	VMDQRKRKRMLSNRESARRSRMRKQEHLTDLTAQIGLLTRDNNQIITSMNVTNQLYMKLEAENSV	26	90	157	MASSSGVSSESSKLQNSGSDEDLNQVMDQRKRKRMLSNRESARRSRMRKQEHLTDLTAQIGLLTRDNNQIITSMNVTNQLYMKLEAENSVLRAQMDELTNRLQSLNDIMDCINSSKWIYEEEDNHNIIGGGDGFLNPWGTGFLNNQPIMASADMFMC
MDP0000129112	40776203	40779181	chr15	KAAQQRQKRMIKNRESAARSRERKQAXQVELESLAVRLEEENEQLLKEQVTELRFGLLL	406	464	489	MAIAGAVKDLRNQRHEVKGHCWNKNLCDLQWTHRHITEQLTEILTGSKLGWRWRLMRRYSAVDKELDGLTSTMENAVEASAVPAVREDTVAESTNIPKGRLVQNRHPAKLALLRGHTHIPYTPTPIAPFRGAHVPESGNCFASLVEKAAPLCAAVRGTLKIPNLVSEREWTESQVPEKSATEEMASSKLMSSSSRSQNSDLSRRPSSFSSATKPKPTTTTPHPSSSSAHPQTLSNYQNSIVNTTPSLPIGSMTADGLLYDPTSMTDATLLDTQITLLDAAADVNGSSAPPPKTVDEVWREIVSGESRKECKAEVPDEMMTLEDFLARAGAVEENDIKDFPLAPPPEMERLSSGVFSFDQIPLSPFGSIDKVEGSIVGFGNGADPAGSGGGVGRGKRGRA…
MDP0000279891	10470937	10474463	chr13	DKEYRRLKRLLRNRVSAQQARERKKVYVNDLESRAKELDDRNSKLEEKISTLVNENAMLRKVLMN	76	140	366	VPWFWSLDDDDDDGDNVPEESDEDMFTVPDVEALPPPNNSINNAASTIAKATSNNNNPDAQSGFPAKRRRGRNPVDKEYRRLKRLLRNRVSAQQARERKKVYVNDLESRAKELDDRNSKLEEKISTLVNENAMLRKVLMNTRPKVDESIEQKQGSVKYTLSDVDREVVTIDVVCTKGIASSQSHIVDVEDIPIFXGSDCIEGFLLWVEDVEKLFKTQPIPEREMVKMVASCLDGDXGLWCDHMQESRRQQGKCPIQTWRWLKRLIVKQFFSDLYELYLEKTGQPIIXKEAKVMENDISLCQETVEAXVEEKEQVIFLGENLVXEDLRKHDNSEVEAQEIQGSYLLAIKTVSRRTRGRVPFKWRSLM
MDP0000435971	11167017	11170907	chr15	LVDPKRAKRIWANRQSAARSKERKMRYIAELEQKVQTLQTEATSLSAQLTLLQDISDYSYGFLYEQRDTNGLTAENSELKLRLQT	227	311	449	MDKDKSPAHGGGFPPPSGRYXGFLPAGAAFNVKPEPSSSSPFPPLASGASADSGXFGHGMSAESSHFSHDISRMPDNPPRKLGHRRAHSEILTLPDDISFDSDLGVVGGADGPSFSDDTEEDLFSMYLDMEKFNSSSATSSFQFGEPSSSAATPAXAIAPSSRAPTXSAENIAIGSNERPRVRHQHSQSMDGSSTIKPEMLVSSSEDINAADSKKALSAAKLAELALVDPKRAKRIWANRQSAARSKERKMRYIAELEQKVQTLQTEATSLSAQLTLLQDISDYSYGFLYEQRDTNGLTAENSELKLRLQTMEQQVHLQDALNDALKEEIQHLKVMTGQATXNGGPMMNYASFGGAGQQQFYPNNQAMHTLLTAQQFQQLQIHSQKQQHQFQQHQLHQL…
MDP0000219041	10499732	10501144	chr13	DRNMSTQTYRLLRNRVSAQQARERKKVYVNDLESRAKELDDRNSKLEEKISTLVNENAMLRKVLMN	161	226	242	MSVPIRAGDGEAKNPMLSISSSSSSLEQLQQVQQPSGSSSSRPPHPSLLLHSNTKXSNKLDVPWFWSLDDDDDDGDNVPEESDEDMFTVPDVEALPPPNNSINNAASTIAKATSNNNNPDAQSGFPAKRRRGRNPVDKEYRRLKRLQLTFPKYISIPIKTDRNMSTQTYRLLRNRVSAQQARERKKVYVNDLESRAKELDDRNSKLEEKISTLVNENAMLRKVLMNTRPKVDESIEQKQRIS
MDP0000250947	22548807	22554714	chr8	KTIERRQKRMIKNRESAARSRARKQAYTSQLEHEVFRLRKMNSWLKKQKKQDESKYMS	231	288	528	MDDRTLGSGNGGERPQFPPLANLDGVQSQLGNIGSKPLNGMHFDELLKNVISADEGQLLQNPNSSSFSTSFFLGNLNGALSKKSADEVWKGISHHELANSAANESLHQRNIRETAATPEHFLVRTGAINLGNQNAMMNAQPVMGIDPAVMVSQPADWFQFQVSAVQQRMTMLDSNFKVCESVYDNSTVNNXDYSENQVGMSIPMPAISASSSESHATAEKKRHFSDEIKEKTIERRQKRMIKNRESAARSRARKQAYTSQLEHEVFRLRKMNSWLKKQKKQDESKYMSYWIPIWSWLSPTCGEQLHTATGRXAYVVESVQMETKSRTSTGRGASAAVQLLEATFGQFLLLTCAWDALLANLLTASALLSLPQDPSALSTTCGQKSHGDDESEHSNSKAV…
MDP0000386314	9106458	9114241	unanchored	ERQMKREKRKQANRESAMRSRSRKQAEYEELVKTCESLNEEKIALQSKMEELKGDSKTLRLENAA	144	208	433	MDQDVTKKLKGSDGTAVPVGYDNPKEGDNGNLVLEASKSLEQNIDGLKDGNDGDTKANHLTQRKNGSDSMQSAENDVKVHTQVSPTTEEEVNEISTNDSGYAPPAAGFVGVSLGSPYEKIGVSTAFVASSTGAQLPFGTSVLDERQMKREKRKQANRESAMRSRSRKQAEYEELVKTCESLNEEKIALQSKMEELKGDSKTLRLENAALREKLKNAQAVTQGGIVSVKIEVDLDLPNDAKNILSNLGSVSRNDELDREKHESSTSETKFHQLMESNARTDAAIFKPPKAVRGGIPICFPQVGTGSLDHNGFARNRIWAIDNDPPPLRPNDSNGKAYVDLLLKPSDDDMKIWPHSEVRIEGLETLDYLDNLCQKERFTEQGDALTFESEVDRAYLKSSDV…
MDP0000121258	30826162	30830577	chr15	KPTDKVQRRLAQNREAARKSRMRKKAYVQQLETSRXKLIQLEQELDRVXQQGVYIGGGLDTNPL	142	205	524	MEKMFELGKQAETIDREQQQQQQXQQLEPEFSIPNPYLCFNSDIHTRGNWEEMIGFREKVEEEEEEKSMNSPSTQFVTSRRMGVFEPIHQISMWDESFRSSGNFNASASMILDVDAKLDNQSEDASHGILGPSSKYDQEATKPTDKVQRRLAQNREAARKSRMRKKAYVQQLETSRXKLIQLEQELDRVXQQGVYIGGGLDTNPLGFSGTINSGITTFEMEYGHWVEEQNRQICELGSALDARISDVELRFLVDNGMSHYFELFSMKSTAAKADVFYVMSGMWKTSAERFFSWIGGFRPSELLKVLQPHLDPLTDQQLLDVHNLRQSCQQAEDALSQGMDKLQHTLAETVAAGQLGEGSYVPQMAXAMERLEALVSFVTQADHLRRETLQQMSRILTTR…
MDP0000378041	1391809	1395238	chr7	DEQDKRKARLIRNRESAQLSRQRKQHYVEELEDKMPRRREVGAWDNLVES	35	84	100	MKATWSREVPSIGGSENNNNNNNAASVNVSASANDEQDKRKARLIRNRESAQLSRQRKQHYVEELEDKMPRRREVGAWDNLVESTFVLEPSHXINFGWSR
MDP0000479652	21395646	21398279	chr12	LSDPKRAKRILANRQSAARSKERKMRYIVELEHKVQTLQTEATTLSAQFTSLQRDSVGLTSENNE	383	447	527	MEGSDETGSSKQQRPNPTFGSSSFLVPKPNSNLDIPNFNPSQMGFRMSPESSKRPGIPPSHPNNHNSMPFSRSQSGSWQLGQQNFSSGSSHARSMSQPPFFSLDSLPPLSPLTYREPSAPSLSDQNSVDVSMGESVVNSHGPSLRSPVNESTAYRAGDGLPPRRGHRRSNSDVPLGFSAINQPSPQLIPVRRRTSFDGSASAKPIQLMKQGSNGNAEGVDDRKSGGEVVDDLFNAYMNLENIDQMNLSGNEDKDIDSRASASKTNGGESSDNEVESGLNGNRNGAGVQRPGSGFPNERREGLKRTASGDVVSSARHCRSISMDSYMENLNFDDEPLKPLGQQSPSTSLDGNSAKFSMEFGSGEFNAIELKKIMESEKLAEIALSDPKRAKRILANRQSA…
MDP0000834642	6813691	6815518	chr4	DKEYRRLKRLLRNRVSAQQARERKKIYVNDLESRAKELEDGNLKLEEKISTVVNENAMLRKVLMN	132	196	213	MSVPIRAGDGEAKNPMLSISSSSSSSLEQPQRQPSGSSSLKLPHPSLLLHSNNKNSNKLDVPWFWSLDDDGDNVPEVSDEDMFMVPDVEALRPPNNSINNAASTIANATSNNNPDAQSGFPAKRHRGRNLVDKEYRRLKRLLRNRVSAQQARERKKIYVNDLESRAKELEDGNLKLEEKISTVVNENAMLRKVLMNTRPKVDEGIEQKQGSVK
MDP0000300820	1214016	1216474	chr8	LSDPKRAKRILANRQSAARSKERKMRYIVELEHKVQTLQTEATTLYAQFTLLQRDSMGLTSENNE	383	447	508	MEGSDETGSAKQQRPNPAFGSSSFLVPKPNSNLDIPNFNPSQMGFRMSPESSKRPGIPPSHPNNHNSMPFSRPQSGSWQMGQQNLSSGSSHTRSMSQPPFFSLDSLPPLSPLTYREPSPPSLSDPNSVDVSMGESVVNSHGPSLRSPVNDSTAYWAGDGRPPRRGHRRSNSDVSLGLSAISQPSPQLIPAGRRTSLDESASGKPVQLMRQGSNGNAEGMDERKSGGEVVDDLFNAYMNLENIDQMNLSGNEDKDMDSRASGSKTNGGESSDNEVESGLNGNRNGMLRPASGLPNERREGLKRTASGDVVPNARHCRSISMDSYMDNLNFDDEPLKPLPVGQQSPSTSLDGNSAKFSMEFGSGEFNAIELRKIMENDKLAEIALSDPKRAKRILANRQSA…
MDP0000198495	44193653	44196263	chr15	KATQQKQRRMIKNRESAARSRERKQAYTVELESLVTQLEEEXARLLRQQAEQKKERFKRVPGMGR	213	277	391	MAASSKMVVVSTTNSDLPRRESICSLSTLMADNDDDHRKHPSITMDDILKNIYSSTATNDMDDNDHHQQHQQHQHHAEXRSVDDVWKEIVAGGVGVGMGEEEEGTAEGDGGDQVRAGEGGGGGGMEEMTLEDFLTRARAVREEDVNVTASGVPIGYGQFQVQPPPPPPPPPPPAAQGQLVYANGTTSGGGGRGGGGGGRAGKRRVVQEAPLDKATQQKQRRMIKNRESAARSRERKQAYTVELESLVTQLEEEXARLLRQQAEQKKERFKRVPGMGRKTLPVTDYGMAHGEPHSXRREAETTTXSSQSTFDALVDAVPPMLSAVIHTRNLHIGCPSSRLKGKPMVLDDGLIHTNVEXFECGIPMLIRLLVGDFRXWYTDVDPFTICKYVTK
MDP0000437680	33166561	33166989	chr3	TVDEKKRKRMLSNRESARRSRMKKQKQIDDLTTEITRLEMSNNQVRQTVDARERSYNEIESANNV	17	81	142	MSSVQRQSSSGSDGSATVDEKKRKRMLSNRESARRSRMKKQKQIDDLTTEITRLEMSNNQVRQTVDARERSYNEIESANNVLRAQAMELTDRLQSLNSVLHIFEEVSGFSVDIPEMHDPLLKPWQRPYPSQXIPASSSMFFI
MDP0000234798	34951292	34951717	chr11	TVDEKKRKRMLSNRESARRSRMKKQKQMDDLTTEITRLEMSNNQVRQTLDARERSHNEIESANNV	17	81	141	MSSLQRQSSSGSDGFATVDEKKRKRMLSNRESARRSRMKKQKQMDDLTTEITRLEMSNNQVRQTLDARERSHNEIESANNVLRAQAMELTDRLQSLNSVLHIFEEVSGFSVDIPEMHDPLLKPWQIPCPQPIPASSDMFFI
MDP0000949327	34954027	34954452	chr11	TVDEKKRKRMLSNRESARRSRMKKQKQMDDLTTEITRLEMSNNQVRQTLDARERSHNEIESANNV	17	81	141	MSSLQRQSSSGSDGFATVDEKKRKRMLSNRESARRSRMKKQKQMDDLTTEITRLEMSNNQVRQTLDARERSHNEIESANNVLRAQAMELTDRLQSLNSVLHIFEEVSGFSVDIPEMHDPLLKPWQIPCPQPIPASSDMFFI
MDP0000274723	17224462	17227383	chr7	KPTDKVQRRLAQNREAARKSRMRKKAYVQQLETSRLKLVQLEQELDRARQQGVYIGGGLDS	94	154	416	MPSFHLCLLLPSPSLSLFSSMNSPSTQFVTSRRMGVYEPIHQISMWDESFRSSGNFNASASMILDEDIKLHNQSEDTSHGILGPSSKYDQETTKPTDKVQRRLAQNREAARKSRMRKKAYVQQLETSRLKLVQLEQELDRARQQGVYIGGGLDSNPLGFSGTINSGLFVSMLSAISSLCCVIAFITCPRILKFETPSSAGVTTFEMEYGQWMEEQNRQICELRTALHACISDVELXFLVDSGMNHYFELFSMKSTAAKADVFYVVSGVWETSAERFFSWIGGFRPSEILKVLQPHLDPLTDQQALDVHNLRQSCQQAEDALSQGMDKLQHTLAETVAAGQLGEGSYVPQMANAMERLEALVSFVTQADHIRRETLQQMSRILTTRQAARGLLALGEYFQ…
MDP0000133698	29559299	29562177	chr11	PADPKRVKRILANRQSAQRSRVRKLQYISELERSVTTLQSEVSALSPRVAFLDHQRLILNVDNSA	207	271	356	MAQLPPKIPSMTQNWPSFPHQRLPAMANFIPTATTTSAAAVQPSSNQPNQQQQSSSCNWMDEFLDFSSARRGAHRRSASDSIAFLESPLILDEECRNPTATMMHHHGSTNNLGFDRLDDEQLMSMFSDDMSVTVPPTISSSNPSTPSDQNSNNDENNINNGNNNNMKPLMLHLDQQQQPKTEPGEVESSSCEADANAQSHPPPPTSPADPKRVKRILANRQSAQRSRVRKLQYISELERSVTTLQSEVSALSPRVAFLDHQRLILNVDNSALKQRIAALAQDKLFKDAHQEALKKEIERLRQVYHHQTLKKMDNQGNRNQNAQQHQQQQQQQQQQQQQSNPDIMVCTDHNEQQILN
MDP0000134936	27871861	27873934	chr3	PADPKRVKRILANRQSAQRSRVRKLQYISELERSVTTLQSEVSTLSPRVAFLDHQRLILNVDNSA	208	272	353	MAQLPPKIPSMTQNWPSFPHQRLPTMANFIPTTTTTSAAAGQPSSNQPNQQQQQQSPSYNWIDEFLDFSSARRXAHRRSASDSIAFLESPLILDEECRNSTATMIHHHGSTNNLGFDRLDDEQLISMFSDDMSVTVPPTVSSSSXSTPSDQNSNNDENNINNDNNNNKKPLMVHLDQQQPKTEPGEVESSSCEADANTQSHPPPPTSPADPKRVKRILANRQSAQRSRVRKLQYISELERSVTTLQSEVSTLSPRVAFLDHQRLILNVDNSALKQRIAALAQDKLFKDAHQEALKKEIERLRQVYHHQTLKNMGKQGNQNSQQHQKKQQQQQQQQSNPDIMVCTDHNEQQILN
MDP0000190277	1339936	1340394	chr15	TVDERKRRRTMSNRESARRSRWRKKRHLEDMTNEVERLKIENLEMKNRLGVVAQKCHVTWRENDR	60	124	152	MMMSSSAMFINHEPAHMGHFECPVQETELTTAEIQELLSLLQAGNSASPSSEGSNREVYTVDERKRRRTMSNRESARRSRWRKKRHLEDMTNEVERLKIENLEMKNRLGVVAQKCHVTWRENDRLTSESLALCARLSDLYRILIAMQMQYSQ
MDP0000280559	21390957	21393913	chr12	LSDPKRAKRILANRQSAARSKERKMRYIQELEHKVQTLQTEATTLSAQFTKLQRDSVGLTSENNE	406	470	580	MEGSDDTGSGSGSGSAKQQRPNPTFGSSSFSIPKPNSNLDIPNFNPSSQMGLPMRQSSPSLSPENSKRPGIPPSHPNNHNSMPFSNVMRPQSRSWQLGTQNLSPGSSHTRSLSQPPVFSLDSLPPLSPLTYRDPSGPSPSDPNSVEVSMEETVNSQGPSLRSPVADSSAFWAGDGLPPRRRHRRSNSDVPLGFSAIIQSSPQLIPIGRQTSLDGSASGRDNSGIGKPNQLMKQGSNGNAEGMDERKSGGEIADDLFNAYMNLENIDKMNSSGNEDKDLDSRASGSKTNGCESSDNEVESGLKGNGNGRQRPGSGFPNERREGLKRTAGGDVVSNVRHCRSISMDSYMESLNFDDEPLKPLPLGQQSPSTSLDGNSAKFSMEFGSGEFNAIELKKIMENE…
MDP0000247372	3234880	3237744	chr4	TVDPKRAKRILANRQSAARSKERKARYISELERKVQTLQTEATTLSAQLTLFQVLTEMLIWLAVYDYSNRDTSGLSSENTELKLRVQA	153	240	421	MQDPANPKPDPSSSSQDSHHPRMAPPFPDTTPSAPFRGSYHRRTQSEVHFRIPDDLDLLQDPSGSFEELGGSEDDIFSTYMDMEKLGSKLDDGPSDVKPENADGSMQEEGGGGFGGEMSARPRHRHSNSVDASLDSVEAKKAMAPDKLAELWTVDPKRAKRILANRQSAARSKERKARYISELERKVQTLQTEATTLSAQLTLFQVLTEMLIWLAVYDYSNRDTSGLSSENTELKLRVQAMEQQAQLRDALNDALKKELERLKVATGEQITHTDSYNLGMHHFPYSQSPFYSNQAQPGSRDSQNIHMPQFHQFQPNMSAHHQPMLASSQLHACSDMSQQDPIGRFQGLDINNRAALGRELLMNAYRFPNSFVRVAHVILRDAALRAGEPXSPPCVVYSF…
MDP0000300532	32162650	32171692	chr2	PKDQKTLRRLAQNREAARKSRLRKKAYVQQLESSRLKLTQLEQELQRARQQADDPARVQTLTWLLEHERLDIYAGSKE	111	188	286	MVVEVVVANSGGGDGHNSEMVEVVVAMVTEGGVPSCRQRLAITKGSTFLLVLFCIKWWYLEVGIXSAMADGSPRTDISTDGETDDKNRRFDRDQYAIAPVASDSSDKSKDPKDQKTLRRLAQNREAARKSRLRKKAYVQQLESSRLKLTQLEQELQRARQQADDPARVQTLTWLLEHERLDIYAGSKEGAMAFDVEYGRWQEEHNRQINELRSAVNSHASDTELRIIVDGVLAHYDEVFRLKGTAAKADVFHLLSGMWKTPAERCFLWLGGFRSSELLKVKLFLIS
MDP0000277999	36408113	36420573	chr15	RSADKVQRRLEQNREAARKSRMRKKAYVQQLETSRLKLAQLELEIDRARKQGAYASSSLGT	431	491	719	MEHIIGCXISHXAWTCLQERLAYVSMVRINQLKSEFHTIQKGGESVNKFLPRVKAIIDQLVSAGEKIIENDFLIAVLSXLPXEFEMIKIYKGXNNNNSRSFXSNFXNKNGNGNTSDNLSGNGKSXQNNGHSFSNGDAWILDTGAIHHMTTNANALSQVNPYNGDEKIIIGNGEDIHNFKVFGXAIYPLXGPYTVNKLQARSSKCVFLGYALGYKRAICYDXQNXMLVXSRHVAEKLAGKIDDAXVEGXAXAPRAGTXNPSLAPTXLHARXGVWVEMRGRDFVPVSRXEWLXSXRFWLESHEFAXEVXVASXCLXAPQRKXEREEXASRSRRYNSSGTKESLRQSDXXKFEVIVYKSMSYSSTQFATSRQMGIYEPFRQIGVWKETFRGDHTSNTAASTI…
MDP0000307943	24064421	24072646	chr14	TPDPKTLRRLAQNREAARKSRLRKKAYVQQLETSRIKLTQLEQELQRARSQGMFLGGGLVGGEQQNLPVGINN	197	269	494	MASSIQENSNQLEHQQQQHHHQIQDQHHXHQQQQIQYGMMQSSSSNIPAGNFISNKDGXAAYDXGELDQALFLYLDGQSQDHHNPSVNHVHHQDQRHPHQNNSSSGMRPPTLNIFPSQPMHVEPSSTQAAATGLVSSSSSGSKRPSLPSMELANPRNDCTAPPPPSGPPQQPAKAIKREGNRKGPTTSSSEQEGPKTPDPKTLRRLAQNREAARKSRLRKKAYVQQLETSRIKLTQLEQELQRARSQGMFLGGGLVGGEQQNLPVGINNISSDAAVFDMEYARWLEEHHRLMCELRAAVQEHLPENELRLFVDNCLAHYDEVLNLKGMVAKTDVFHIVSGMWKSPAERCFMWMGGFRPSDVIKIILNQIEPLTEQQLLGICGLQQSTQETEEALSQGLE…
MDP0000320322	7564687	7571368	chr14	TPDPKTLRRLAQNREAARKSRLRKKAYVQQLETSRIKLTQLEQELQRARSQGMFFGGGXVGGEQQSLPVGINN	245	317	542	MGFSRGFDFGGRGGQEEENKRDHQLLETKLLXSSARPTSTSSSFLMASSIQGNSNQLEHQQQHHHQIQDQHHHHHQQQQQQIQYGMMQSSSANIPAGNFISNKDGGAAYDLGELDQALFLYLDGQSQDHHNPSANHVHHQDQRHLHQNNSSSGMRPPTLNIFPSQPMHVEPSSSTKAAGTGLVSPSSSGSKRPSEPSMELANARNDSTAPPPPSGPSHEPAKAIKREGNRKGPTTSSSEQEGPKTPDPKTLRRLAQNREAARKSRLRKKAYVQQLETSRIKLTQLEQELQRARSQGMFFGGGXVGGEQQSLPVGINNTSSDAAVFDMEYARWLEEHHRLMCELRAAVQEHLPENELRLYVDNCLAHYDEVLNLKGMVAKTDVFHIVSGMWKTPAERCFM…
MDP0000129203	79664124	79666821	unanchored	TVDPKRAKRILANRQSAARSKERKARYISELERKVQTLQTEATTLSAQLTLFQRDTSGLSSENTE	156	220	361	MQDPXNPKPDPSSSSQDSQRPRMAPPFQDATPSLPFRGSYHRRAQSEVHFRIPDDLDLLQDPFDGPSGRFEELGGSEEDIFGTYMDMEKLGSKLDDGPSDLKPENAGGSLQSEGGGFGGDMSARPRHRHSNSVDASLDSIEAKKAMAPDKLAELWTVDPKRAKRILANRQSAARSKERKARYISELERKVQTLQTEATTLSAQLTLFQRDTSGLSSENTELKLRVQAMEQQAQLRDALNDALKKELERLKVATGEQLTHTDSYNLGMHHFPYSQSPFFPSQSQTGSRDSQNIHMPQFHQFQPNMSAPHQPMLGSSXSHACLDMSQQDPIGRFQGLDINNRGSHLVRPEGPSISAGESNRRF
MDP0000210251	26145161	26147824	chr12	TVDPKRAKRILANRQSAARSKERKARYISELERKVQTLQTEATTLSAQLTLFQRDTSGLSSENTE	156	220	361	MQDPANPKPDPSSSSQDSQRPRMAPPFQDATPSLPFRGSYHRRAQSEVHFRIPDDLDLLQDPFDGPSGRFEELGGSEEDIFGTYMDMEKLGSKLDDGPSDLKPENAGGSLQSEGGGFGGDMSARPRHRHSNSVDASLDSIEAKKAMAPDKLAELWTVDPKRAKRILANRQSAARSKERKARYISELERKVQTLQTEATTLSAQLTLFQRDTSGLSSENTELKLRVQAMEQQAQLRDALNDALKKELERLKVATGEQLTHXDSYNLGMHHFPYSQSPFFPSQSQTGSRDSQNIHMPQFHQFQPNMSAPHQPMLGSSXSHACLDMSQQDPIGRFQGLDINNRGSHLVRPEGPSISAGESNRRF
MDP0000261154	20032093	20041062	chr15	VVDERKRRRMISNRESARRSRMRKQKHIENLRNQVNRLRVENRELNKRLRIVLYHFQLVRTDNDR	768	832	873	MGYYNNLQNCHPFXKLDFPIFSEGDDPLRWIYKAEHYFDFFNIEDSKKVKLASFHMEGEALQCPSELEDSVENLVKLKQLGTLKDYVLDFRRLANRMRDISPALLKLCFIGGLKPELRHDVKLLKPKNVLDVAAFAXQIDAKLTNLKVKAKPPYLQSNFGSPLQNLNXTMVGDNRPRPXNIRRLTPXEINHCRKNGLCFHCKDKFVKGHTCERKQHFLIDVQDSELDDTENIEIEELEITACALFGTPAPPTIQTMKVLALPDFSKPFVIETDASGHGIGXVLQQEGFDYEIQFKQGCNNQATDALSRSPLTTSDPQLHALXEGELRAISYPYSQWMDDLSKDLXKDQWIISKIQNLGATEDNNVPIPNLKFKVDNGLLKYKGRIEGMKKFIKELVACC…
MDP0000555457	19165120	19167848	chr17	KIDPKRVKRILANRQSAQRSRVRKLQYVSELERSVNSLQAEVSVLSPRVSFLDHQRLLLNVDNSA	186	250	327	MAQLPPKVPSMTPNWPDFSHQKMPPSMGGCFAPNGNATAATTSQNPCWVDEFLDFSSVRRGSHRRSXSDSXTFLEAPMQEECRVSAAPPGSHSHSHANNNHEFDRFDDEQFMSMFTTDEISAAAATVGPTGSSSNXSTPSDHXSINDDEKETQGINKQQQINKQLKNESEEGESQCELQTTSNGRKIDPKRVKRILANRQSAQRSRVRKLQYVSELERSVNSLQAEVSVLSPRVSFLDHQRLLLNVDNSALKQRIAALAQDNIFKDAHQEALKREIERLRQVYXQQNVKKMERVTQSPTSRTPPSDTISTTPPPPDRKEHLLNVSSS
MDP0000169473	17793553	17794938	chr15	SGGDRRHKRMIKNRDSAARSRARKQECISPVLAYTNELELKVAHLMEENARLKGQLEQLIAAASQQPKR	207	275	286	MLSSTGSDQTNHNTTSTSSWSSSSSPSPFSQPSSFQTPQRTMEEVWKDFNLASLTDPTTQIRSSSSTSPLLQINLPNGPHQGHHHHPNFRNMTLQDFLARPFAHDSPAAAAALVSAAASPPSPLAPAAPTLLGLNNPGSEFQLFYASDSLRPPSSGFIDHHQANHNNISSSVSNSFSGCPFESLAASSFGLPSFGKRSFTESDNSNSGGDRRHKRMIKNRDSAARSRARKQECISPVLAYTNELELKVAHLMEENARLKGQLEQLIAAASQQPKRHNLHRTSTAPF
MDP0000536881	15746255	15752194	unanchored	PGDQKTLRRLAQNREAARKSRLRKKAYVQQLESSRLKLTQLEQELQRARQQGIFISSSGDQSHS	161	224	450	MGSRRVKVGANDGNKVVTEMPSFVPPVPTPNPSVTEGSSIRSSQVSDFGILEQTLGFRIEDAVDIGRSAMFNHNKLSSPAVGSSDAQFGALNKLIPLQKEPQPLSVSRSNHENWGESNMADGSPRTDTSTDDTEDKNQRIEGNQITGLLASDSSDRSKEKPGDQKTLRRLAQNREAARKSRLRKKAYVQQLESSRLKLTQLEQELQRARQQGIFISSSGDQSHSMSGNGALAFDVEYARWLEEHNRQINELRAAVNSHAGDTELRTVIDNVIAHYDDIFRIKGTAAKADVFHILSGMWKTPAERCFMWIGGFRSSELLKLLVNQLEPLTEQQLVGIYNLQQSSQQAEDALSQGMEALQQSLAETLASGSPAPSGSSGNVANYMGQMAMAMGKLGTLEGF…
MDP0000262210	11304636	11311688	chr12	SGDQKTLRRLAQNREAARKSRLRKKAYVQQLESSRLKLTQLEQELQRARQQGIFISSSGDQSHS	163	226	534	MGSRRVKVGANDGSKVVTDMPSFVPPVPTPNPTGTEGSSIRSSQISDFGTLEQTLGFRIEDAVDIGRSPMFSQNKLNRQAVGSSVAQFGALNKLMPLQKEPQPNLLSVSRSNHENWGESNMADGSPRTDTSTDDTEDKNQKIERNQMTALLASDSSDRSKEKSGDQKTLRRLAQNREAARKSRLRKKAYVQQLESSRLKLTQLEQELQRARQQGIFISSSGDQSHSMSGNGALAFDVEYARWLEEHNRQINELRAAVNSHAGDTELRTVIDNVIAHYNDIFRLKGTAAKADVFHILSGMWKTPAERCFMWIGGFRSSELLKLLVSQLEPLTEQQLVGIYNLQQSSQQAEDALSQGMEALQQSLSETLASGSPAPSGSSGNVANYMGQMAMAMGKLGTLD…
MDP0000295681	4782814	4784704	chr3	TLDPKRAKRILANRQSAARSKERKSRYIQELERKVQTLQTEATTLSAQLTLFQRDTTGLSTENTE	230	294	320	MKQDPHLQQSNPNPDFFTFNSNPNPNPKSNPIPPLPRSVGIDGNANASGLAAAATSSSSTSFTTSTSLSLATMLGNSASPFIREDADGSHHDHNHDVSHRRANSEVSFRLPKDMMDLPAAAGDPFNGGSSTPSLEEMGSEEDLFSTYIDLDKLGGSNNSSDQNSGGNDGPDGGPNGNAGGGEGGGGGEKRPSRHRYSSSVDGSSTSTGLFGEVMEAKKAMPPDKLAELWTLDPKRAKRILANRQSAARSKERKSRYIQELERKVQTLQTEATTLSAQLTLFQRDTTGLSTENTELKLRLQSMEQQAQSRDGEQHANFYHI
MDP0000145555	2703862	2707043	chr13	TGDQKTLRRLAQNREAARKSRLRKKAYVQQLENSRLRLSQLEQELQRARQQGIX	176	229	466	MQSFKAASTNPEFYSHSSFYFRGDDSDRNQTRFTDLGELEQSATAFPHDDAVVLSPSSMFSLKANNVGGVPDSLQYGTLNVGGCLDIXSTITGTGGGGCVDTGQQQPYMYQQQKXTTSSGNGHFENWGDNSAMADNSQQTDTSTDVDTDDKNHLHGVQHGALMVVDSTEQAKERTTGDQKTLRRLAQNREAARKSRLRKKAYVQQLENSRLRLSQLEQELQRARQQGIXIADGLPGDHGHSVAGNGALTFNLEYARWLEEHQRLIHDMRSAVNSHMGDNELRILVDSVMTHYDEIFRLKSIAAKIDVFHMLSGMWKTPAERCFMWLGGFRSSELLKILGNHLEPLTDQQLMGICNLQQSSQQAEDALSQGMEALQQSLVETLSSPIHCPTGSDNVADYM…
MDP0000301884	2710089	2713271	chr13	TGDQKTLRRLAQNREAARKSRLRKKAYVQQLENSRLRLSQLEQELQRARQQGIX	176	229	466	MQSFKAASTNPEFYSHSSFYFRGDDSDRNQTRFTDLGELEQSATAFPHDDAVVLSPSSMFSLKANNVGGVPDSLQYGTLNVGGCLDIXSTITGTGGGGCVDTGQQQPYMYQQQKXTTSSGNGHFENWGDNSAMADNSQQTDTSTDVDTDDKNHLHGVQHGALMVVDSTEQAKERTTGDQKTLRRLAQNREAARKSRLRKKAYVQQLENSRLRLSQLEQELQRARQQGIYIADGLPGDHGHSVAGNGALTFNLEYARWLEEHQRLIHDMRSAVNSHMGDNELRILVDSVMTHYDEIFRLKSIAAKIDVFHMLSGMWKTPAERCFMWLGGFRSSELLKILGNHLEPLTDQQLMGICNLQQSSQQAEDALSQGMEALQQSLVETLSSPIHCPTGSDNVADYM…
MDP0000297791	4673815	4676378	chr11	NLDPKRAKRILANRQSAARSKERKARYMQELERKVQTLQTEATTLSAQLTLFQRDTTGLSTENTE	244	308	448	MSTETTTPPMHQDQHLLQQPNPNSNFFTFNSNPNPNPNPKSNPIPPLPRSVGISGNANASGLAAAATSSSSTSSTTSTSLSLATMLGNSASPFIREDADGSHLHHDYGGSHRRAHSEVSFRLSEDMVDMSAAAADPFNGGSSTASLEEMGSEEDLFSTYIDLDKLGGSNNSSDQNGGGNDGPNGGPNGGSNGNGGGGDGGGEKKLSRHRYSSSVDGSSTSTGVFGEVMDAKKAMPPDKLAELWNLDPKRAKRILANRQSAARSKERKARYMQELERKVQTLQTEATTLSAQLTLFQRDTTGLSTENTELKRRLQSMEQQAQLRDALNEALKKEVERLKIATGEMMSASDSFTLGMHQMPYNHPSAYFPLQQQPGPASHQTMHLPQFNHSQSSMPTQHLH…
MDP0000305387	4683517	4686081	chr11	NLDPKRAKRILANRQSAARSKERKARYMQELERKVQTLQTEATTLSAQLTLFQRDTTGLSTENTE	244	308	448	MSTETTTPPMHQDQHLLQQPNPNSNFFTFNSNPNPNPNPKSNPIPPLPRSVGISGNANASGLAAAATSSSSTSSTTSTSLSLATMLGNSASPFIREDADGSHLHHDYGGSHRRAHSEVSFRLSEDMVDMSAAAADPFNGGSSTASLEEMGSEEDLFSTYIDXDKLGGSNNSSDQNGGGNDGPNGGPNGGSNGNGGGGDGGGEKKLSRHRYSSSVDGSSTSTGVFGEVMDAKKAMPPDKLAELWNLDPKRAKRILANRQSAARSKERKARYMQELERKVQTLQTEATTLSAQLTLFQRDTTGLSTENTELKRRLQSMEQQAQLRDALNEALKKEVERLKIATGEMMSASDSFTLGMHQMPYNHPSAYFPLQQQPGPASHQTMHLPQFNHSQSSMPTQHLH…
MDP0000306302	32586980	32588028	chr9	KIDPKRVKRILANRQSAQRSRVRKLQYISELERSVTSLQVEVSVLSPRVAFFDHQRLLLNVDNSA	189	253	272	MAQLPPKAPSMTPNWPDSSHQKMPPSMGGCFAPNGNAIAATTSQNPSWVDEFLDFSSARRGSHRRSISDSITFLEAPMQEECRVYAAPPGSGPHSHSQANNNHHEFDRFDDEQFMSMFTTHEISAAAAAAVVGPTGSSSNPSTPSDHNSINDDEKEAQGKQQQINKQLKNESEEVESQCELQTTSNDRKIDPKRVKRILANRQSAQRSRVRKLQYISELERSVTSLQVEVSVLSPRVAFFDHQRLLLNVDNSALKQRIAALAQDKIFKDGTH
MDP0000178326	32583190	32585878	chr9	KIDPKRVKRILANRQSAQRSRVRKLQYISELERSVTSLQVEVSVLSPRVAFFDHQRLLLNVDNSA	189	253	328	MAQLPPKAPSMTPNWPDSSHQKMPPSMGGCFAPNGNAIAATTSQNPSWVDEFLDFSSARRGSHRRSISDSITFLEAPMQEECRVYAAPPGSGPHSHSQANNNHHEFDRFDDEQFMSMFTTHEISAAAAAAVVGPTGSSSNPSTPSDHNSINDDEKEAQGKQQQINKQLKNESEEVESQCELQTTSNDRKIDPKRVKRILANRQSAQRSRVRKLQYISELERSVTSLQVEVSVLSPRVAFFDHQRLLLNVDNSALKQRIAALAQDKIFKDAHQEALKREIERLRQVYHQQNVKKMEKVAQSPTSLTPSSDTISNPPPDQTEHLLNVSSS
MDP0000320524	3433485	3446567	chr7	PKDQKTLRRLAQNREAARKSRLRKKAYVQQLESSRLKLTQLEQELQRARQQGIFISNSGDAAHS	224	287	526	MSFIQRAVKVPPNSASLDEARHRVFDFFRAACRSIPTIMDIYNLDDVVAPSHLRSAVASEIRKNASVTNPKVIDMLLFKAMEELNNITEHAKQRHHIIGHRYCVEFNLHHPQKSKVVAEQSLPPPDRRRKIFFSSFFRFCSFGRYQTSFSRHQRVGIPKGSFLFAGSVSNSGIEKWAESAMADGSPRTDISTDVDTDDKNQRFDRDQYAIAPVASDSSDKSKDPKDQKTLRRLAQNREAARKSRLRKKAYVQQLESSRLKLTQLEQELQRARQQGIFISNSGDAAHSNSGNGLFFFSPIVKFVVGAMTFNVEYGRWLEEQNRQINELRSAVNSHASDAELRIIVDGILAHYDEIFRLKGTAAKADVFHLLSGMWKTPAERCFLWLGGFRSSELLKLLVT…
MDP0000738631	28097624	28098310	chr8	VVDERKRRRMISNRESARRSRMRKQKHLENLRNQVNRLRVVNRELNNRLRIVLYHFQRVRTDNDR	122	186	228	MKHQXIVPXLSSFPPPSXSKLEVQRAFVVATMLSTLPANLPSDSLLHFSAFDGGFTPWDCSDLFQATPSPKPVISTLSSSPVQSSKTVISSSCSDDDPNRPDRTHANAKSCQNDDSNRTVSVVDERKRRRMISNRESARRSRMRKQKHLENLRNQVNRLRVVNRELNNRLRIVLYHFQRVRTDNDRLRSDHVMLRQKLSDIRRILVFSQLQHFSSAWPCNTIIPEQTP
MDP0000222114	5620437	5623701	chr3	RFGRKMWRGNRIISNRASAQKSRLKKVQYVMEMEKKAKTLESQIAFLAPQVEFYTHQKQFLQMEQKS	47	113	280	MAEKWPKILSLFGFLQIRDRFEHAKLKSGSRMVRSLFVVLTSSNSMRFGRKMWRGNRIISNRASAQKSRLKKVQYVMEMEKKAKTLESQIAFLAPQVEFYTHQKQFLQMEQKSLNGKIAAYTNDKIQKDAEIEATKKEVARLRQLLDQKANIQAGANASSRMVNQKDAGLLEQMPTPCFNQSGPGKMSFSNSEKRGTTYLIGESSSEANKLKQVTVAQEEQQNQNQPVGLTTMAGQEPARAEQSVPQQKDKNKMNSEDGDQEMKDVMNFNEQKQQQERFI
MDP0000488746	5626620	5631464	chr3	SLDSRKLKRIISNRASAQKSRLKKVQYVMEMEKKAKTLESQIAFLAPQVEFYTHQKQFLQMEQKS	115	179	340	MAPSNVPLAPAGSSQVWNQFYLMNHSSGIGGSSSSYAYANKPPLQPSSNNPAVANTTNTASVVAVMDADGKNSGPDSDDDDHADAGNQYKDINKGKIVLVDGVQVRLGGNMDTESLDSRKLKRIISNRASAQKSRLKKVQYVMEMEKKAKTLESQIAFLAPQVEFYTHQKQFLQMEQKSLNGKIAAYTNDKIQKDAEIEATKKEVARLRXLLDQKANIQAGANASSRMVNQKDAGLLEQMPTPXFNQSGPGKMSFSNSEKVGESSSEANKLKXVTVAQEEQQNQNQPVGLTTMAGQEPARXXQSVPQQKDKNKMNSEDGDQEMKDVMNFNEQKQQQERFI
MDP0000250967	1376596	1386527	chr16	TGDQKTLRRLAQNREAARKSRLRKKAYVQQLENSRLRLSQLEQELQRARQQGIFIXNGLPGDHGHSXAGNGA	728	799	1018	MNNISHSFSSSTSSSVNSASITTXDPNAISSRRSMDGSQALAAEPSRRWRDIFWLGVFLIHLVLVGCALIVLGINRFKKTDRLNIDRYTQRFLENQRGLTENYWLLYALAGGVGTLLGWTWLFFLRSQANHMMKFAVHILTTYLAVISVLLFWMEQFFWGVAFAIGAVLQFMYVLSIVDRLPFTMLVLQAAVKMVWSLREVMRVAYAFMLIMLVWMVXWSFGAAGVVASSIGDGGRWWLLVVLSISLFWTGAVLCNTVHVIVSGMXFLVLIHGGREAPSMPPNSLMKSLRYAVTTSFGSICYGSLFTAFIRTLRWKIRGVRSKIGNNECLLCCVDFLFNLVETLVRFFNKYAYVQIAVSGKGFNHSARDAWELFQSTGVEALVAYDCSGAVLLMGTVLG…
MDP0000190186	34462771	34463508	chr2	NKDHSIPRPRRRRPSGNREAVRKYREKKKAHTAYLEEEVKKLQVLNQQLVRKLQGQAILEAERLRLRGLLLE	80	151	245	MDDGEVVTSDHALLPNPNSSSTFHGSTYEDTFFDEFLKTARTCTHTHTCNPPGPDAAHTHTCYHTHTQILSSEDDDGTKNKDHSIPRPRRRRPSGNREAVRKYREKKKAHTAYLEEEVKKLQVLNQQLVRKLQGQAILEAERLRLRGLLLEFRGKIDTELGVFPFGNQCNSNTYFEDSQCNLQSSVGAMGLRCQTDLXCFCPPVGSSVQASIGARGETXVPSGGNCQPAVIDCRANXNEASTQAK
MDP0000893802	34458341	34459078	chr2	NKDHSIPRPRRRRPSGNREAVRKYREKKKAHTAYLEEEVKKLQVLNQQLVRKLQGQAILEAERLRLRGLLLE	80	151	245	MDDGEVVTSDHALLPNPNSSSTFHGSTYEDTFFDEFLKTARTCTHTHTCNPPGPDAAHTHTCYHTHTQILSSEDDDGTKNKDHSIPRPRRRRPSGNREAVRKYREKKKAHTAYLEEEVKKLQVLNQQLVRKLQGQAILEAERLRLRGLLLEFRGKIDTELGVFPFGNQCNSNTYFEDSQCNLQSSVGAMGLRCQTDLXCFCPPVGSSVQASIGARGETXVPSGGNCQPAVIDCRANXNEASTQAK
MDP0000898701	34429393	34430130	chr2	NKDHSIPRPRRRRPSGNREAVRKYREKKKAHTAYLEEEVKKLQVLNQQLVRKLQGQAILEAERLRLRGLLLE	80	151	245	MDDGEVVTSDHALLPNPNSSSTFHGSTYEDTFFDEFLKTARTCTHTHTCNPPGPDAAHTHTCYHTHTQILSSEDDDGTKNKDHSIPRPRRRRPSGNREAVRKYREKKKAHTAYLEEEVKKLQVLNQQLVRKLQGQAILEAERLRLRGLLLEFRGKIDTELGVFPFGNQCNSNTYFEDSQCNLQSSVGAMGLRCQTDLXCFCPPVGSSVQASIGARGETXVPSGGNCQPAVIDCRANXNEASTQAK
MDP0000293847	4682921	4686053	chr3	TLDPKRAKRILANRQSAARSKERKSRYIQELERKVQTLQTEATTLSAQLTLFQRDTTGLSTENTE	250	314	454	MDGHGISCLVIGSSGYTCDHTNIVTKLWMIVSTYTXANSFPMQLXMPPPNGIYAWGGSVGIDGNANASGLAAAATSSSSTSFTTSTSLSLATMLGNSASPFIREDADGSHHDHNHDVSHRRANSEVSFRLPKDMMDLPAAAGDPFNGGSSTPSLEEMGSEEDLFSTYIDLDKLGGSNNSSDQNSGGNDGPDGGPNGNAGGGEGGGGGEKRPSRHRYSSSVDGSSTSTGLFGEVMEAKKAMPPDKLAELWTLDPKRAKRILANRQSAARSKERKSRYIQELERKVQTLQTEATTLSAQLTLFQRDTTGLSTENTELKLRLQSMEQQAQSRDXLNEALKKEVERLKIATGERMSPSDSFNLGMHQMPYNHPSAYFPLQQQPGPASHQTMQLRQFNHSQSNM…
MDP0000301399	5626357	5631201	chr3	SLDSRKLKRIISNRASAQKSRLKKVQYVMEMEKKAKTLESQIAFLAPQVEFYTHQKQFLQMEQKS	115	179	340	MAPSNVPLAPAGSSQVWNQFYLMNHSSGIGGSSSSYAYANKPPLQPSSNNPAVANTTNTASVVAVMDADGKNSGPDSDDDDHADAGNQYKDINKGKIVLVDGVQVRLGGNMDTESLDSRKLKRIISNRASAQKSRLKKVQYVMEMEKKAKTLESQIAFLAPQVEFYTHQKQFLQMEQKSLNGKIAAYTNDKIQKDAEIEATKKEVARLRLLLDQKANIQAGANASSRMVNQKDAGLLEQMPTPGFNQSGPGKMSFSNSEKVGESSSEANKLKQVTVAQEEQQNQNQPVGLTTMAGQEPARAEQSVPQQKDKNKMNSEDGDQEMKDVMNFNEQKQQQERFI
MDP0000120158	4782005	4784925	chr3	TLDPKRAKRILANRQSAARSKERKSRYIQELERKVQTLQTEATTLSAQLTLFQRDTTGLSTENTE	230	294	472	MKQDPHLQQSNPNPDFFTFNSNPNPNPKSNPIPPLPRSVGIDGNANASGLAAAATSSSSTSFTTSTSLSLATMLGNSASPFIREDADGSHHDHNHDVSHRRANSEVSFRLPKDMMDLPAAAGDPFNGGSSTPSLEEMGSEEDLFSTYIDLDKLGGSNNSSDQNSGGNDGPDGGPNGNAGGGEGGGGGEKRPSRHRYSSSVDGSSTSTGLFGEVMEAKKAMPPDKLAELWTLDPKRAKRILANRQSAARSKERKSRYIQELERKVQTLQTEATTLSAQLTLFQRDTTGLSTENTELKLRLQSMEQQAQSRDXLNEALKKEVERLKIATGERMSPSDSFNLGMHQMPYNHPSAYFPLQQQPGPASHQTMQLRQFNHSQSNMPTQHLHQSNSHTLLSDMLQN…
MDP0000234166	1063026	1065436	chr11	QESCLDSIRWIWANRQSAARSKERKMRYIAELEQKVQTLQTEATSLSAQLTLLQRDANGLTAENSE	249	314	345	MDKDKSHAHGGGFPPPSGRYSSFLPTGAAFNVKPEPSSSSSFPPLASGASADSGHFSHDISRMPDNPPRKLGHRRAHSEILTLPDDISFDSDLGVVGGADDPSFSDETEEDLFSMYLDMEKFNSSSATSSFQFGEPSSSAAAPAPVIAPVSRAPTSSAENIAIGSNERLRVRHQHSQSMDGSSTIKPEMLVSSSEDINAADSKKSLSAAKLAELALIDPKRAKRSMPLMILSLQSSYRLIFKAMELVFQESCLDSIRWIWANRQSAARSKERKMRYIAELEQKVQTLQTEATSLSAQLTLLQRDANGLTAENSELKLRLQTMEQQVHLQDGELLLPFMIRINFHV
MDP0000602946	41411070	41414903	chr15	LIDPKRAKRILANRQSAARSKERKVRYTNELERKVQTLQTEATTLSAQVTLLQRDTTVITAENKE	264	328	421	MAPLLSTCYSLTTQQLQLLQVHPTTQNQNQNQKHFSHFYQPSPFSSFAFNNLNSGHRPPPPLATSNRKKGPKDKKMDSNNINNFGAASRPSPTSSTDMEQMSETPQRGSHHRRAHSDTSFRIPNFDDLLLFDPSDLDLSCLPXPTLLPRGGNSSNNNIPMSLDSDDSSEGQPPNPFSSTPKPAASSGSTATAAHLRSLSVDSDFFDGLGLGDSGREVSGGQRSGSHHRHSSSMDGSSFDADSSVMTLNGFKKSVAPERLAELSLIDPKRAKRILANRQSAARSKERKVRYTNELERKVQTLQTEATTLSAQVTLLQRDTTVITAENKELKLRLQALEQQAQLRDALNEKLKEEVQRLKIETNQIPPGAGNGNPFYRGLPPQYGQTQHHQNHNQQNQHQQ…
MDP0000772633	1913688	1914425	chr7	ERSIXKPRRRRPLGNREAVRKYRDKKKAHAAYLEEEIRKLQVLNQQLVGKIQAQATLEAEFLKLKGLVLE	82	151	245	MDDGXVVASDHAXLPNPNCXSNFPGSTSVDTFFDEILNTQTCTHTHTCNPPGPDAAHTHTCYHTHTQVLSSEDDDDDSKNKERSIXKPRRRRPLGNREAVRKYRDKKKAHAAYLEEEIRKLQVLNQQLVGKIQAQATLEAEFLKLKGLVLELRRMIDNELGAFPFQKQLNSNTYFKESQCNLQSSVGAMGLHCQTDLPCSCPPVGSSVQAGIGARQKTMVSSGRNCQPAVIDCRANTNEASTQAE
MDP0000141948	1902910	1910401	chr10	QISIKLFAIELMILANRQSAARSKERKVKYANELERKVQTLQTEATTLSAQVTLLQEKSQTSLLQFKG	199	266	917	MDSNNVNNNFGAAAGPFPTFNDMEQMSETPQRGSHHRRAHSDTSFRTPNFDDLLLFDPSDLDLSCLASPNLPPRGSDSDNIAMFLESDDSSGGQPPNPFSSTPKPTASSGSTATAAHLRSLSVDSDFFDGLGLGDSGRELTGGQRSRSHRHSISMDGSSIEADSSVITLNGFKKSIAPERLAELSLTDPKRAKRFFLQQISIKLFAIELMILANRQSAARSKERKVKYANELERKVQTLQTEATTLSAQVTLLQEKSQTSLLQFKGRCLVLDSCFLAEVKVFSLTPHYNGILIGLFSREKVITDLISSRALVVCRYNRKTRVYHVLLSMVQRDTTVITAENKELKLRLQALEQQSQLRDALSEKLKEEAQRLKIEANQIRPGAGNGNPFYGGLPPQYAP…
MDP0000636541	20963304	20970848	chr12	NREDHHNSTNGRHKRMMKNRESAARSRARKQEPFCPSISLLIAYTNELEIEIAQLREENARLKRQLQAKSMINSEPLGARREKGKLMDELCV	137	228	484	MEDVWKDISLASLSRNASDNTTTSTHHPTAAAFRGITFQDFLASTSTTSSNIDPPPPAAASTVLRLNCGTRSDLKQHLLETTSATITGPALLKPNPITRPTSTSVTTTTTRPNSLNNPSSVFPSCCKKRALDDHDQNREDHHNSTNGRHKRMMKNRESAARSRARKQEPFCPSISLLIAYTNELEIEIAQLREENARLKRQLQAKSMINSEPLGARREKGKLMDELCVNTRTKAISIKIDTTKVLELSTKCRTETQLCIWAAAKSLIIPLEVEHLTILPYARMGKPNAVVYTYKHGFSGFAARLSNEEARSIAEKPGVVSVFPDPLLKLHTTHSWDFLKYQTALKIDSSIKLKNLDLPKIKTISRTVPKEFSCPTDSNADYISNINYPSIAISNFNGKE…
MDP0000120802	7122677	7124802	unanchored	LTDPKRAKRILANSQSAVRSKERKMRYISELKQKVQTLETEVAILNAQLTLLKGDFDSIRNETNE	328	392	439	MGIPPSSSSSSHSHHILPISPCSEIMVSQPTVFSLDSLHPLTPSQYRNSSSSASMQNGDVGACSLLSPSHLTKENYLRTGECLSPCNAHRRSNSDIPFGFSSLMQQSFPPIAPIRGLGGLELSMSGAENLGLVKPAQLVQKKSSLQRVSDNNVVGELVDDLFLIYMNSDNIDVLNSLGTDDKNEHENCEELGRASGIKTGDNSVTEAESNVNESGGSIRKLGLNIFNDKREVIRRSAWGDIAPTSRHRRSVSMDCFKGKLQFGDELHRLPPSLGTPPGQVSPSNSTGAPSNSIDANLNAFSSEFRYVEFSEAEMKNIMANEKLSGVALTDPKRAKRILANSQSAVRSKERKMRYISELKQKVQTLETEVAILNAQLTLLKGDFDSIRNETNELKFRLQA…
MDP0000121603	1336067	1339625	chr14	EKEERRIRRIMANRESARQTIRRRQALCEELTRKAADLALENENLKRKKELXVKEFQSLEKTNKH	145	209	514	MVSSWRRSFSSSTXSTAAGPSSSPDSGSYSSSTSGGVGGFGGSGGADRMVKEELQAAEALADLAHLAMQLVKGFENKDQAVTGLQQCETVCTNVLTEPVKTEQVLSEKVVKAEHDTELNKPSPICTTIYPSFTCSKSRRNLTEEEKEERRIRRIMANRESARQTIRRRQALCEELTRKAADLALENENLKRKKELXVKEFQSLEKTNKHLKVQMAKVIKAEDQEALAENMSAYVQMQIPPSSPTNSPFCLFNRPPITPLFWPXIIQSSNSIQVQHVLQNPIAVLSNISLPANGAAXSSLDQETPPNINGARTPLCVFPCPWFIPHFDNGXGLQPQSSLCLNNKQEEXSFNNQYSSSSSSRAXTQLDNHQSSLPVRLKTQDSASIEGRPSHDLNETPAQF…
MDP0000159670	7691211	7692609	chr10	EKKSKKQPLGNKVAVRKYRENKKARVKLLEAEVVNLRAENRQLVMRLQGQPALEAEIARLKCLLVD	86	151	280	MDDHEVDFSNQEVFSPANMGGELASSCSMDTFFDDLLKDTHACTHTHTCNPPGPDYSHTHTCFHVHTKIVSSASENKADDTCESGEKKSKKQPLGNKVAVRKYRENKKARVKLLEAEVVNLRAENRQLVMRLQGQPALEAEIARLKCLLVDIRGRIEGEIGSFPYQKSVNPSLPNPNLPNAFFMNPCNDDQLYCPHPRMDGKCGDGAMMNGQDFNGCDFESLQCLVNQDGGSKELPGCGPGNGASNVNSSGTSKRKIGFFEGFEPQHQTEKLWKEALTLS
MDP0000267964	117559360	117560488	unanchored	KIEPKRVKRILANWQSAQRSRVRRLQYILELECGVTTLQSEVSTLLPRVAFLDHQRLILNIDNSA	244	308	325	MAVSMVSATKRFTKAQFVSRLARSMEAELDLSFFSWHLTLRSPFLSFENAAALPTLGTFLQLLSDNPAALLLQPLIRDPDPDRRVLRLLIRQALGTPEECQNPTATMMHHHGSTNNLDFGRLDDEQLMSMFFDDDDLRGSKGSRSAEECKRRRNRRRCRTMSGRWAGSAPRISSMIERRKRMMSGKIRSWRENDMSVTVPPTVSSSSPSTPSHQNSNNDENNIKKDNNNNKKPLMVHLDQQQSKIEPKRVKRILANWQSAQRSRVRRLQYILELECGVTTLQSEVSTLLPRVAFLDHQRLILNIDNSAIKQWIAALAQDKLLKDV
MDP0000147745	1336237	1339584	chr14	EKEERRIRRIMANRESARQTIRRRQALCEELTRKAADLALENENLKRSLTIHGSTNFIHIFGDILNPKKKELXVKEFQSLEKTNKHLKVQMAK	206	298	588	MVSSWRRSFSSSTGSTAAGPSSSPDSGSYSSSTSGGVGGFGGSGGADRMVKEELQAAEALADLAHLAMRESSGAESGGNWGQKGKRARKRVKSESPPSRSGLNPLDPPPTCPDLLPQILGNNGVLGKNSNLSMTSYRDDQAVTGLQQCETVCTNVLTEPVKTEQVLSEKVVKAEHDTELNKPSPICTTIYPSFTCSKSRRNLTEEEKEERRIRRIMANRESARQTIRRRQALCEELTRKAADLALENENLKRSLTIHGSTNFIHIFGDILNPKKKELXVKEFQSLEKTNKHLKVQMAKVIKAEDQEALAENMSAYVQMQIPPSSPTNSPFCLFNRPPITPLFWPXIIQSSNSIQVQHVLQNPIAVLSNISLPANGAAXSSLDQETPPNINGARTPLCVF…
MDP0000319187	8925905	8927336	chr8	EKKSKKQPLGNKVAVRKYREKEKARVKLLEDEVVNLRAENXRLVMRLQGQPALEAEIARLKCLLVD	185	250	361	MCKKSRSKNFPRTLEPTSNQILEHGFERESRHLRVKTVRLTFERERLAESLSHRPIPIRGMFIFLSVKXIALEIWSGSRPSFEILVLXHSIGAYSSLVFALFTLMDDQEVFPGANMGGELASSCSMDSFFDDLLKDTHACTHAHTCNPPGPDYSHTHTCFHVHTKILSSASEDKAGTDDTAESGEKKSKKQPLGNKVAVRKYREKEKARVKLLEDEVVNLRAENXRLVMRLQGQPALEAEIARLKCLLVDIRGRIEGEIGSFPYQKSVNPXLPNPNMPXAIFMNPCNVQCDDQLYCLRPGMDGKCGDGAVMNGQDFNGCGFESLQCFANQDGGAKELPDCGLGNGVSNVNSSGTSKRKSKT
MDP0000203904	14534461	14537997	unanchored	EKEERRIRRVLANRESARQTIRRRQALCEELTRKAADLALENENLRRSRAYLTIEVLILFTSLNP	185	249	543	MVSSEGRSFSSSTGSTAAGSSSSPDSGSYSSSTNGAVERFGGSGGGVDXMVKEELEAAEALADLAHLAMRESSGAESXGNWGLKRKRAGKRVKSGSPPSQSGLYPPDPAPTCPDLPQDQAVTGLRQCETVCTNVVTELVKTEQVLSEKVVRAEHDPELNKPSPICTTSXPSFSCSKSRRNLTEEEKEERRIRRVLANRESARQTIRRRQALCEELTRKAADLALENENLRRSRAYLTIEVLILFTSLNPKKKELAXKEFQSLEKTNKHLKVQMTKVIRAEDEKTAGENMSAYVQMQIPPSSSTNSPFFLFNRPPFAPLFWPSIIQSSNSTQVQHIPQNPIAIPSNISLPANGAAGSSLEQDNPSNINGARAPLYVFPCPWFIPHFDNGNGLQPQSSLCL…
MDP0000374836	14508562	14511180	unanchored	EKEERRIRRVLANRESARQTIRRRQALCEELTRKAADLALENENLXRMTKVIRAEDEKTAGENMS	108	172	446	MNKFTNIHATQSPNSQLYVGXSHQIAIFSPGFEXYFCLYQDQAVTGLRQCETVCTNVVTELVKTEQVLSEKVVRAEHDPELNKPSPICTTSHPSFSCSKSRRNLTEEEKEERRIRRVLANRESARQTIRRRQALCEELTRKAADLALENENLXRMTKVIRAEDEKTAGENMSAYVQMQIPPSSSTNSPFFLFNRPPFAPLFWPSIIQXSNSTQVQHIPQNPIAIPSNISLPANGAADSSLEQNPSNINGARAPLYVFPCPWFIPHFDNGNGLQPQSSLCLNNKQEETSFNNXFSANSSSRTVAQLDNHQSSFPVRLKTEDSPSIEGRPSCDLNETPAQFPLDGGDQHTGPHPMENGCKEIFPSAASLNHSGVASCIKNENGFESDYTVTTLNSYHKFSA…
MDP0000470928	10846181	10848760	chr2	SGGDGRHKRMIKNRESAARSRARKQAFALLMEENARLKRQQEHEVLELLRRGEDPVSS	183	240	240	MLSSTGSDQTNYITTGTSSRSSSSSPSPVSQPSSFQTPQRTMEEVWKDINLASLTESTTQIRSSSSSSPLLHVNLPNGTHRXHPNCRNMTLQDFLARPFAHDSPAAATALVSSAVSPPSPLPPSSLRPPRSGFIDHHQLNPNNLSSSVSNSFSGCPFESLAASSSGLPSFGNRSFTESDHSNSGGDGRHKRMIKNRESAARSRARKQAFALLMEENARLKRQQEHEVLELLRRGEDPVSS
MDP0000169112	701768	703993	chr8	NSTIGGRHRRMNKNRQSAARSRAQKQEPFCPCISLPIMCSYSSTFAYTNELELEIAHLREENARLKRQQARMMILLAWIVTFLLX	96	180	289	MVPTXSSSCSRRSMEDVWTDISLXYLSHNSCNATTTAADDPAAAAFRGIIFQDFLACTSTISSNIDPPQPAAAIFPSCYKKRALDDHDQNHDDHHNSTIGGRHRRMNKNRQSAARSRAQKQEPFCPCISLPIMCSYSSTFAYTNELELEIAHLREENARLKRQQARMMILLAWIVTFLLXIPYPCLIAASKKANPLQNLNSSILIALFLCDQGRCDLSNGCFTADLWDLSKLDLRKLCFMEFLLRFKEANCTITRKQKFKRSSHEVVEFLIGGGYKFSXEXEEENIKKK
MDP0000137206	50581196	50585348	unanchored	ETDAKRAKQQFAQRSRVRKLQYIAELERNVQALQASAEGTEVSAELEFLNQQNMILSMENKA	233	294	426	MANSKGSSNIRNFMYSGKHPLLPPKSPLPSVPPSYADYVLSPAIGSKTVQKPREGNAHHQRTSSESLLIEEQPSWLDDLLNEPDTPIRRGGHRRSSSDSFAYVDAINASNLDYATQDDYKYHNMISALSWGSQDLDPRKDLRHASLYTELNLVKQKNKAWESSLNSVNNLNSLPSVRDNIVLQSSGSLSTPQEADGIASTASEKHDHVDSGLHDPKSSSERKDNSNAKPYASETDAKRAKQQFAQRSRVRKLQYIAELERNVQALQASAEGTEVSAELEFLNQQNMILSMENKALKQRLESIGQEQLIKYYKHSPSHKTEMITMMILKELPNGCFQSLFLKCKNSHLRVLSXSHLEQELLEREIGRLRVLYQQQQQQHQQQQQQQQPSSSHRRSNSRDL…
MDP0000772665	5637807	5639294	chr3	NMDQKKLKRLLASRQYSQRYRQKQASYVEQLENELKALQTEVAIKAPRVKFADQRNMLLRAENNT	62	126	282	MEGFNEKTNMKMPPLPTLPSSHLGLQISNNDSITIRLAPPSYQINGDVDKAKGVAPPPEESNMDQKKLKRLLASRQYSQRYRQKQASYVEQLENELKALQTEVAIKAPRVKFADQRNMLLRAENNTMRQMVDAKSGEYMYKRAEHDLLKGEKDSLLQLYEATRQQRAAEAFRPPNYHQMTNLSLNQPGLGFGVAYQFNQPASPIDTLVLKQTTDDLNQHAAGQSFVDMMNNADTYNMSMXNNGMNNIIDMNDHMDMNPLEMINNDFDESDQQNPDGSANKFM
MDP0000136654	15979065	15981055	chr1	PSDPKKXLRILANRESARRAYMRKLEYEAKLHQDAKEAEEKVARLSSQVAFYEXKQGLLQMENIQ	42	106	152	MXFSKQAAKASXGHHSASDSPSSLDDKSSHMEMTPNVGDVGPSDPKKXLRILANRESARRAYMRKLEYEAKLHQDAKEAEEKVARLSSQVAFYEXKQGLLQMENIQIKERIKYLENYIAHKDGETLELSVERERLLWSREMQRGSGSGFSNN

## Sheet: Prunus persica
Gene name	Location		Chromosome	Predicted bzip domain			Protein
	start	end		sequence	start	end	Length	sequence
ppa008024m	16607379	16611066	scaffold_7	ERELKRQKRKQSNRESARRSRLRKQAECEELQARVETLSNENHNLRDELHRLSEECEKLTSENTN	256	320	348	MGTGEEGTPSKPSKQASTAQEIPTTPSYPDWSSSMQAYYGPGATPPPFFASTVASPTPHPYMWGAQHPMMPPYGTPVPYPAMYPPGGVYAHPSMVATPASAQTNPELEGKGPDGKERVSTKKPKGTAGNTGLVGGKAGESGKATSGSGNDGASQSGESGSEGSSDGSEDNANQQEYGANKRGSFDKMLADGANAQNTGANVQASVPGKPVSMPATNLNIGMDLWNSTPAGAGGAKMRANPSGAPSAAGADHWIQDERELKRQKRKQSNRESARRSRLRKQAECEELQARVETLSNENHNLRDELHRLSEECEKLTSENTNIKEELTRVCGPDFVANLEQQPGGGEGNS
ppa006173m	18939395	18944692	scaffold_2	ERELKRERRKQSNRESARRSRLRKQAETEELARKVDALSAENVALKSEISRLTENSSTLKLENAT	282	346	424	MGNDDDGKSAKSEKSSSPLTADQTNHSNQTNVHVYPDWAAMQAYYGPRVALPPYYNSAVASGHAPHPYMWGPPQPMMPPYGTPYAAMYSHGYAHPAVPLGSHGQAVPSSPSAATPLNMETPTKSSGNADRGLMKKLKRFDALAMSIGNSNVGDAEGGAEHSVSQSLGTEGSSEGSDGNTAGENQTRRKRSREGTPATAGDGKTDMQPSPVSAKEVNAASDKVLGATVAAPSVPGKLVGPVVSPGMTMALEFKNSPNLNSKSSSTSVPQSCAVLPPEAWMHNERELKRERRKQSNRESARRSRLRKQAETEELARKVDALSAENVALKSEISRLTENSSTLKLENATLMDKLKNTRVGRMEEIMMNIDDKRVQPFSTENLLSRVNNSGSIARDAEKEGDM…
ppa006484m	3081686	3091025	scaffold_5	ERELKRQRRKQSNRESARRSRLRKQAECDELAQRAELLKEENATLRSEVSRIRSEYEQLLSENAS	306	370	409	MGSSEMDKPAKEKEKESKTTPASTQEQSATTSAGTVNPDWSGFQAYSPIPPHGFLASSPQAHPYMWGVQHIMPPYGTPPHPYVAMYPHSGLYAHPSMPPGSYPFSPFAMPSPNGIVEASGNTPGSMEADGKPSEVKEKLPIKRSKGSLGSLNMITGKNNEPGKTSGASANGVHSKSAESASEGTSEGSDANSQSDSQLKSGGRQDSLEGDASQNGSSAHGSQNGAPNTHSMLNQTMAIMPITAAGAPGAVPGPATNLNIGMDYWGAPPSSGVPAMRGKVPTTPVTGGLVTAGSRDSVQSQLWLQDERELKRQRRKQSNRESARRSRLRKQAECDELAQRAELLKEENATLRSEVSRIRSEYEQLLSENASLKEKLGEIPGHEDPRSARSEQKLSNDTKQ…
ppa020524m	11698624	11701254	scaffold_5	ERQVKREKRKQANRESARRSRMRKQAEYEELVRTFESLNTEKMALKSKLEELKGDSEKLRLENAT	100	164	231	MDQDVKKKLKGLDGTAVPVGYDSLKDTGHPVLEASKRYFLFILFYTYILLRLCTRQQLPVSFMMLSPDVANLNFDSVTMCSLEQNIDGLTDGSDGNTKDERQVKREKRKQANRESARRSRMRKQAEYEELVRTFESLNTEKMALKSKLEELKGDSEKLRLENATLMEKLKHAQVVPKGGIASVEIEVDLDLPTGTENILSNLGSVSRNAQLDCEAHESSMSETKLHAVAAR
ppa008716m	5025527	5032673	scaffold_2	KTVERRQKRMIKNRESAARSRARKQAYTNELENKVSRLEEENERLRKQKELEKVLPSAPPPEPKYQLRR	248	316	322	MGIQTMGSQGGADGNCKQSQFQPLARQSSIYSLTLDEVQNQLGDLGKPLSSMNLDELLKNVWSAEANQTMGMDIEGTTLVNQATLQRQASLSLTSALSKKTVDEVWRDIQQSKNNEEKKSQERQRTLGEMTLEDFLVKAGVVAEAEASSDKKCSAPLAVVDANVASQFPQGQWLQYQQPQYQHPQQSMMGVYMPSQPIPPPLHIGAGAIMEVPYPDNQVALPSPLMGTLSDTQTPGRKRGNPEDIVEKTVERRQKRMIKNRESAARSRARKQAYTNELENKVSRLEEENERLRKQKELEKVLPSAPPPEPKYQLRRTTSAPF
ppa011644m	18395507	18396267	scaffold_3	LINERKQRRMISNRESARRSRMRKQKHLDELWSQVVWLRNENHQLVDKLNHVSESHDKVLQENAQ	83	147	202	MQPGEVTGLHYLVPSSSSSPYPPHFSMSTQSNTTPFQFNRFSSPLYNLQFPNSHLQEINNPQQPSSFSSNSTSDEADEHQLSLINERKQRRMISNRESARRSRMRKQKHLDELWSQVVWLRNENHQLVDKLNHVSESHDKVLQENAQLKEQASELRQMLTDLQLHSPYHPSLRDLEDVPCNTAYLRSESSNQSITSSMDLLG
ppa005476m	19923352	19926060	scaffold_8	PSDVKRARRMLSNRESARRSRRRKQAQMSELETQVGQLRVEHSTLLKRLTDVNQKYDNAAVDNRI	232	296	459	MHSVFSVDDVSDTAWALSSPAMNRSASEWAFEQFLDEFSTPAATPRRSVAVADQLTASSVASCSVASQSSTSKREDGDEEVVEIKKPDHHNHHHQPQQQLNHPPPPPLDPTSTVQVNSDQYREFLKNQLDLACAAVALSRPVDLGNMAAESQSQLSKPSQLAHSQSLDKDAGHGFPVQQNEADTSPLGIPALPAVQKITGLQSKQTTSGSSKEDSDDDDLEGDIEINENMDPSDVKRARRMLSNRESARRSRRRKQAQMSELETQVGQLRVEHSTLLKRLTDVNQKYDNAAVDNRILRADIETLRAKVKMAEDSVKRVTGINPLLLAMSNLPSVSIPSVNPMDGSTNAAVPMQPNSNQLFHPVVPNLATSTLPHQRLDTGFPRDPPISLVRNQQSNVGQ…
ppa005367m	19923352	19926060	scaffold_8	PSDVKRARRMLSNRESARRSRRRKQAQMSELETQVGQLRVEHSTLLKRLTDVNQKYDNAAVDNRI	237	301	464	MHSVFSVDDVSDTAWALSSPAMNRSASEWAFEQFLDEFSTPAATPRRSVAVADQLTASSVASCSVASQSSTSKREDGDEEVVEIKKPDHHNHHHQPQQQLNHPPPPPLDPTSTVQVNSDQYREFLKNQLDLACAAVALSRASSLKPVDLGNMAAESQSQLSKPSQLAHSQSLDKDAGHGFPVQQNEADTSPLGIPALPAVQKITGLQSKQTTSGSSKEDSDDDDLEGDIEINENMDPSDVKRARRMLSNRESARRSRRRKQAQMSELETQVGQLRVEHSTLLKRLTDVNQKYDNAAVDNRILRADIETLRAKVKMAEDSVKRVTGINPLLLAMSNLPSVSIPSVNPMDGSTNAAVPMQPNSNQLFHPVVPNLATSTLPHQRLDTGFPRDPPISLVRNQQ…
ppa007814m	37258901	37261719	scaffold_1	PLDIKRIRRMVSNRESARRSRRRKQAQLADLEFQVEQLRGENSTLYRQLTDASQQFRDADTNNRV	184	248	354	MEQKHVAMCSAAHSQLTSSSLFACSELKQSTSEFSLSEALEFLDRSMIGQEAADTQSYKDEKLGEFRAYVRDRNFADTEVLFGDVWAGDLSFDFKSRDIMNGFSSSGELTETLLCTQNLTPKNSSISATMDSQSSICVGSPTSAAKPIARDNQARGAESGSSGDQSDEDDFEIEAGPCGDSTDPLDIKRIRRMVSNRESARRSRRRKQAQLADLEFQVEQLRGENSTLYRQLTDASQQFRDADTNNRVLKSDVEALRAKVKLAEDMVARGSITTSLNQIRQGHLGTPQQFNPHNLRGVAQVSPTVTIHGDDARYAGMAVSGQNGGLGLGNAGMANSNLSNRIMSNTVSCVSDIW
ppa012281m	16776071	16776688	scaffold_5	EQSINYERRLKRMISNRESARRSRMRKKKQIEELQYQVDQLHATNRQLSEKLIQLLEGNQQILQENAQ	66	133	176	MEPNESKGPHYLTSHSIPTQSHPNPVHNLDSISLCSTRFFPLSHIHDFSPNTSSLSNETAFDEAGEQSINYERRLKRMISNRESARRSRMRKKKQIEELQYQVDQLHATNRQLSEKLIQLLEGNQQILQENAQLKERVSSLQILLADLITPLRNVGDVITTTTNGNRLRAEDSSTP
ppa006503m	36170846	36174535	scaffold_1	KVVERRQRRMIKNRESAARSRARKQAYTMELEAEVAKLKEENQELQKKQDMEIINLQRGKKRCLRRT	338	404	409	MGTNMNFKGFGNDPPGINPLARQSSIYSLTFEELQNTIGGSGKDFGSMNMDELLKSIWTAEETQIMAPSGGGAGGQNGLGLGGGSLQRQGSLTLPRTLSQKTVDEVWKNISKEGTGPGGSNMPQRQQTLGEMTLEEFLVKAGVVREEAQLAPKPANNGAGFFGDLSRFGNTGGNLDFEFQQTNRGVGVMGNRVSETNSQVPNQASNLPLNANGVRSNQQQQQLPQQQQIFPKQQPVTYNTSPLPMGPNAQLGSPGMRGGIMGIGDQGLNGTLVQSSGMGMVGLGAAGAVRVATGSPANQLSSDGIGKSNGTDTSSVSPVPYVFNGGFRGRKGGGPVEKVVERRQRRMIKNRESAARSRARKQAYTMELEAEVAKLKEENQELQKKQDMEIINLQRGKKR…
ppa012064m	39065316	39068270	scaffold_1	DKESKRLKRLLRNRVSAQQARERKKAYLSDLEVRVKDLEQKNSELEEKLSTLQNENQMLRHILKN	103	167	185	MLKTTKNNSSLFDLFRDQMQEQATSSLAASSLPSSSERSSSSAFQVEVKEGMESDEEIRRVPEIGGESAGASISGRETGSLAGPDRAQVVGEGQRKRGRSPADKESKRLKRLLRNRVSAQQARERKKAYLSDLEVRVKDLEQKNSELEEKLSTLQNENQMLRHILKNTTASRRGAGSNANAEGSL
ppa011589m	28436588	28437225	scaffold_1	IIDERKQRRMISNRESARRSRMRKQKHLDELWSQVVRLRNENQSLIDRLNYVSESHDRVVQENTK	81	145	204	MLPGEIISGLHYLAPETPIPDPAHFGIMQNNMSSLHFNTLFNNLSQAQNFPAGHEFTQQSSSLSNNSSTSDDAEEHQHLRIIDERKQRRMISNRESARRSRMRKQKHLDELWSQVVRLRNENQSLIDRLNYVSESHDRVVQENTKLKEEASDLRQTLTNLQIGSPYNINATTFRELEPEVPCNTAHLRAESSNQSIAASADLLH
ppa006752m	14350519	14353189	scaffold_8	KVVERRQRRMIKNRESAARSRARKQAYTLELEAEVAKLKEMNEELQRKQTEIMEMQKDQILETVKR	314	379	396	MGSNFNFKNFGDAPPGEGNGGKAAGNFTLARQPSVYSLTFDEFQNTIGGLGKDFGSMNMDELLKNIWTAEETQGVTSTSGAGEGSAPGGNLQRQGSLTLPRTLSQKTVDERQQTLGEMTLEEFLVRAGVVREDVQPVVRPNNSGFYGELYRPNNHNGLAPGFQQPSRTNGLLGNRVADNNNSVLNVGGVRSSQQQTQQLPPQQQPLFPKPTNVAFAPSMHLTNNAQLTSPRTRGPMTGVVEPSMNTVFTQVGGFPGAGIGMTGLGTGGGAVAARSPTNQISPDVIAKSSGDTSSLSPVPYMFSRGRKSNGALEKVVERRQRRMIKNRESAARSRARKQAYTLELEAEVAKLKEMNEELQRKQTEIMEMQKDQILETVKRQRGGKRQCLRRTLTGPW
ppa013020m	17089448	17090121	scaffold_7	VMDQRKRKRMLSNRESARRSRMRKQEHLTDLTAQIGLLKKENHQILTSMNVTNQLYMNLEAENSV	14	78	144	MLQNSGSDEDLHQVMDQRKRKRMLSNRESARRSRMRKQEHLTDLTAQIGLLKKENHQILTSMNVTNQLYMNLEAENSVLRAQMDELSNRLQSLNDIIDCINSSKWLFEAEEEDTQIIGGDGFLNPWSTLCLNQPIMASADMFMC
ppa019833m	14262153	14264451	scaffold_7	KVVERRQRRMIKNRESAARSRARKQAYTVELEAELNQLREENAHLKQALAELERKRKQQYFDEMQ	360	424	449	MGVSESEIISHDEVESPLQSDQQATNHLFTSLGRQSSIYSLTLDEFQHTLCENGKNFGSMNMDEFLTSIWTAEENQAINSNHTNINNNHNHHNHHNSNMNNIDAHMPLAEASEEKAAAIAKQPSLPRQGSLTLPGPLCRKTVDEVWSEIHKGQQAKQQNSHSSNDGVQNSEFAPRQPTFGEMTLEDFLVKAGVVREPDSMLAAGAVPPPQPQQQQQQYGMYQNSNQAVGPSFANRPVMGMGAAGAAGASTSTAAGMPNYQGIPQNGATVVAESSGYAANGKRNGAYPAVPPPQAVCFGGRVVNGGGGYAAGQPIGMAAPVSPVSSDGMCTSQVENSGGQFGLDMGGLRGRKRILDGPVEKVVERRQRRMIKNRESAARSRARKQAYTVELEAELNQLRE…
ppa025544m	43909596	43910829	scaffold_1	KATQQKQRRMIKNRESAARSRERKQAYTVELESLVTQLEEENARLVREEAEQKKERFKR	193	251	251	MMASSKMVVSTTNSDLPHRESSICSLSTLMADDDDQNDEQQSMTMDDILKNIYTTTTTTTTNDMDDNNHHHAEPRTVDEVWKEIVAGGVGVEEAAAEGEGGGDQVRAAAPEEMTLEDFLTRAGAVREDDVTVGAAGVPIGYGQFQVQPPPAPAQGQVVYGNGTTTSTSGGGGGGGGGGRAGKRRAVQEAPLDKATQQKQRRMIKNRESAARSRERKQAYTVELESLVTQLEEENARLVREEAEQKKERFKR
ppa012507m	33026579	33028018	scaffold_1	LMDQRKRKRMQSNRESARRSRMRKQQHLDDLMGQVTQLRKENNQILTSINITTQHLMNVEAENSV	26	90	166	MASSSGNSSGSTQLQNSGSEGDLQHLMDQRKRKRMQSNRESARRSRMRKQQHLDDLMGQVTQLRKENNQILTSINITTQHLMNVEAENSVLKAQMEELSQRLESLTEILNYINSSNGVFETHEPNNTLLHHHQASASADHNSFINPWNLLYVNQPIMATADMLHQY
ppa012739m	11718445	11719220	scaffold_8	LMDQRKRKRMISNRESARRSRMRKQKHLDDLMAQMAELKKENNQIITSVNITSQHYMNIEAENSV	26	90	157	MASSSGTSSGSSMLQNSGSEEDLQVLMDQRKRKRMISNRESARRSRMRKQKHLDDLMAQMAELKKENNQIITSVNITSQHYMNIEAENSVLRAQADELSNRLQSLNEIASFLNASNGVFAAGDSSSFNEPTDSFFNPLNLSYLNQPIMASAAEMFHY
ppa011967m	21293415	21294582	scaffold_1	DKEYRRLKRLLRNRVSAQQARERKKVYVNELESRAKELEDSNSKLEEKISTLVNENAMLRKVLMN	108	172	189	MSVPIKPGDGKAKNPIMPSSLDQQPSGSSSLRPHSLVHQNNKKSKLEESDEDMFTVPDVEALPPPFNNITSNNTSSTTNATSNTTNNNNPEAQSGFPAKRRRGRNPVDKEYRRLKRLLRNRVSAQQARERKKVYVNELESRAKELEDSNSKLEEKISTLVNENAMLRKVLMNTRPKVDESIEPKAGSVK
ppa024363m	40952450	40953693	scaffold_1	ERTIERRQKRMIKNRESAARSRARKQAYTNELEHEVFQLGKVNSWLKKQKEVEMILASNPTSMPKYQLRR	240	309	315	MEDRTLESGNGGERPQFPPLARQESYNLSNLDEAQSHLGNINSKNGMHFDELLKNVISVEEGQQLQNPSSSSLPASFFLGNFNLNGALSRKTADEVWKEIAHHEHVNTVVANESLQQRLSTIGETPATPEHFLVRAGVINIGNQPSLMNAAQPIMGIDPTVVSQQTDWLQFQMAAVQQQMTMLDSNLKVRESVYENSAVNFDYSENQVGMSMPMPAISASSCESRATAVRKRHFSDEMKERTIERRQKRMIKNRESAARSRARKQAYTNELEHEVFQLGKVNSWLKKQKEVEMILASNPTSMPKYQLRRTSSAPY
ppa005585m	27680735	27684276	scaffold_6	PADVKRVRRMLSNRESARRSRRRKQAHLSELEAQASQLRVENSSLLKRLTDADRKYNEAAVDNRV	246	310	453	MDRMFSVEEMSDQLWSSSAPPVNEADDDLSKMNRSASEWAFQRFLQETSPYSPSPSPPQPPPPPSSSSSSTHHDHNDVAEIKMINAHHPNPTHAPNNNNNNNNNSNDYNSNNTPSFSLQPPNVPVDSEEYQAFLKTKLNLACAAVALSRVKGSLVDSQDSAVLAGSGSQASNTSHLGSQAPSKGAGYDLSRPHDKNANAPVGIPSLPATQHRSVVPVRQATSGSSRELSDDEDIEGETAITENVDPADVKRVRRMLSNRESARRSRRRKQAHLSELEAQASQLRVENSSLLKRLTDADRKYNEAAVDNRVLKADIETLRAKVKMAEETVKRITGLNMFHAVSEISSIGMPPFDGSPSETSTDAAVPVQDDPNHHFCQPASNSPTPTHDLRVKHDSADIP…
ppa002181m	283845	287461	scaffold_2	DEEEKRKARLMRNRESAQLSRQRKKHYVEELEDKVRAMHSTIADLNTRISYVMAENATLKQQLCS	243	307	704	MALPSAPDADHNSANLDHGDFKFNAELDGLAIPPLDPQFFSSDDGMATVPSDTFMSDLGFGFGSDDNCDFELTFDDLDNLYLPSEADDFLIPDGLDPGGTALNSGSPESGSSAISISGDDKGGSDVSRFLNCPSSNESSENSNGPENSGGPENSGGAVSSQGSGISEAVNSTWHSGNSGNSVSSNAISDADDEKVKMEDEITKNCLVKRKKVSDEGNVESRSAKYRRSDNNNASVDANANGNDEEEKRKARLMRNRESAQLSRQRKKHYVEELEDKVRAMHSTIADLNTRISYVMAENATLKQQLCSGSGAMCPPPPHAGMHPHPPMPPMAYPWMPYSPYVVKPQGSQGLLVPIPRLKSQQPVAAPKSKKSETKKTEGKTKKVASISFLGLLFFILLFG…
ppa021433m	35364887	35365327	scaffold_1	SVDEKKLRRKKSNRESARRSRWRKKRQVEDLTNDVNWLKVQNRELKNRLGVVAQKCHVTWRENDR	55	119	146	MLFNHEPVHFNRFECPVQETGLTTAEIQELLSLLQEGNSASPNSGSEDSNRAVYSVDEKKLRRKKSNRESARRSRWRKKRQVEDLTNDVNWLKVQNRELKNRLGVVAQKCHVTWRENDRLTSESLALRARLSDLHWNFVAMQMQSQ
ppa022266m	13698328	13699155	scaffold_6	KTVERRLRRKIKNRESAARSRARKQAYHNELVSKVSRLEEENIKLKKE	196	243	244	MGFQTMASQGNGQQSHFQPSPLLRQPSWYSLTLDEVKNQLGDTGKPLGSMNLDELLQNLWTAEANQSIEMDIENTSSASSLQRQASLTLARALSGKTVDEVWREIQQGQKKRYGEDMKCQDTEITLGETTLEDFLVQAGLFAEASLSPAIALDTIEVAIPQSYPHNLGLSSSPSFGTHSDTTTPGRKRDASDAYEKTVERRLRRKIKNRESAARSRARKQAYHNELVSKVSRLEEENIKLKKEK
ppa013046m	21562175	21563353	scaffold_8	SVDEKKRKRMLSNRESARRSRMKKQKQMDDLTSEITRLEMSNNQLLQGIEVKERGYAEIESRNNV	17	81	142	MSSVQQQSSSGSDGSASVDEKKRKRMLSNRESARRSRMKKQKQMDDLTSEITRLEMSNNQLLQGIEVKERGYAEIESRNNVMRAQVMELTDRLQSLNSVLQIFEEVSGLAVDIPEIPDPLLRPWQVSYPTQLIPASSDMFLG
ppa007578m	16341479	16347112	scaffold_6	KPTDKVQRRLAQNREAARKSRMRKKAYVQQLETSRLKLIQLEQELDRARQQQGIYIGSGLDASPL	74	138	363	MNSPSTQFVTSRRMGAYEPIHQISMWEESFKSNGNFNASASMIVDADTKLDNQSEDASHGILGPSSKYDQEATKPTDKVQRRLAQNREAARKSRMRKKAYVQQLETSRLKLIQLEQELDRARQQQGIYIGSGLDASPLGFSGTINSGVTTFEMEYGHWVEEQNRQINELRTALHAHISDIELRFLVDSGMSHYFELFSMKLTAAKADVFYVMSGMWKTSAERFFSWIGGFRPSEILKVLQPHLDPLTDQQVLDVYNLRQSCQQAEDALSQGMDKLQLTLADTVAAGQLGEGSYVPQMANAMQKLEELVSFVQQADNLRRGTLQQMSCILTIRQAARGLLALGEYFQRLRALSSLWATRPREPA
ppa007593m	40943437	40945713	scaffold_1	RSSDKVQRRLEQNREAARKSRMRKKAYVQQLETSRLKLAQLEQELERARKQGAYVASSLGT	73	133	362	MSYPSTQFATSRQMGIYEPFRQVGVWKETFRGDHSSNTGASSILEVDAGIETKIGYVSHESLAPSGNDQEPNRSSDKVQRRLEQNREAARKSRMRKKAYVQQLETSRLKLAQLEQELERARKQGAYVASSLGTSHMGYNGALNSGITTFEMEYGHWVEEQHRQNVELRNALQDHGTDIELLRILVESGLSHYANLFRMKADAARADAFYLLSGIWRTSVERHFHWIGGFRPSELLNIVLPQLQPLDEPQLVDFYNLRQSSQQAEDALTQGMEKLQQNLALTIAGDQISGEIYGSQMATALEKLEALETFVGQADHLRQQTLQQMSRILTTHQAARGLLALGEYFHRLRALSSLWTAHPREPT
ppa003452m	32763077	32766526	scaffold_1	QSDPKRAKRILANRQSAARSKERKMRYIVELEHKVQTLQTEATTLSAQFTKLQRDSVGLTSENNE	406	470	573	MEGSDETGSVKQRPNSTFGSSSFSVPKPNSHLEIPNFNSAQMGLPMRQSSPSLSPENSKRPGIPPSHPNNHNSMPFSHIMRPQSGSWQLGPQNLSSVPSHTRSLSQPSFFSLNSLPPLSPLPYREPSSSSLSDPNSVDVSMDETVVNSHAPSLRSPVTTDSNAFWAGDGLPPRRGHRRSNSDVPLGFSAVIQSSPQLIPIGRRTSLDGSASGRENLGIGKPVQLVKRGSNGDRDGNKNAEGMDERKSGGEVVDDLFNAYMNLDNIEKMNSSGNDDKDLDSRASGSKTNGGESSDNEVESGLNGNRYNGQRPASGFPSEKREGVKRTASGDVVPNVRHCRSISMDSYMENLNFDDEPLKPLPAGQQSPSASLDGNSGKFSMEFGSGEFNAIELRKIMESE…
ppa022385m	10176556	10178427	scaffold_4	PADPKRVKRILANRQSAQRSRVRKLQYISELERSVTTLQSEVSALSPRVAFLDHQRLILNVDNSA	194	258	332	MAQLPPKIPSMAQNWASFPHQRLPTTANFIPTTTTSAAVQPPSQPQCNWIDEFLDFSSARRGVHRRSASDSIAFMESPLTLEEECRNPSTAMMHHGSTNNLCFDRLDDEQLMSMFSDDMSVTVPPTVSSSNPSTPSDQNSNNDENNNNNNSNKLLMAHQEQQHQQHPKSEPGEDESSCEADPHAQSHPPPPTSPADPKRVKRILANRQSAQRSRVRKLQYISELERSVTTLQSEVSALSPRVAFLDHQRLILNVDNSALKQRIAALAQDKLFKDAHQEALKNEIERLRQVYHHQSLKKMGNQNAQQQQHQQQQQPNPDIMVCTDHNEQQILN
ppa011366m	20564972	20565657	scaffold_6	VVDERKRRRMISNRESARRSRMRKQKHLENLRNQVNRLRIENRELKNRLSYVLYHFQRVRTDNDR	104	168	214	MLSTVPAMLPSDSLLHFPAFDGGFTPGGGGFTPWDCSELFPAIQSPKPTISTLSSGPVQSPKPVISSSGSDDDPNRSVEPVRMNRTHANAKSCPNDASNRAVSVVDERKRRRMISNRESARRSRMRKQKHLENLRNQVNRLRIENRELKNRLSYVLYHFQRVRTDNDRLQSEHVLLRQKLSDIRQILVYRQLQHMSSAWPCNTVIPEQTPSLIA
ppa005999m	17923124	17926991	scaffold_1	LIDPKRAKRIWANRQSAARSKERKMRYIAELEQKVQTLQTEATSLSAQLTLLQRDTNGLTAENSE	227	291	433	MDKDKSPAHGGGLPPPSGRYSGFLPTGTPFNVKPEPASSSLFPPLASGASADSGHFGHGMSAESSHFSHDISRMPDNPPRKLGHRRAHSEILTLPDDISFDSDLGVVGGADGPSFSDETEEDLFSMYLDMEKFNSSSATSSFQFGEPSSSAAAPVPALTPALRAPTSSAENIAIGSNERPRVRHQHSQSMDGSTSIKPEMLVSSSEDISAADSKKALSAAKLAELALIDPKRAKRIWANRQSAARSKERKMRYIAELEQKVQTLQTEATSLSAQLTLLQRDTNGLTAENSELKLRLQTMEQQVHLQDALNDALKEEIQHLKVLTGQAMPNGGPMMNFASFGSGQQFYPNNQAMHTLLTAQQFQQLQIHSQKQQHQFQQHQLHQLQQQQMQQQQQQQQQQ…
ppa003825m	10666586	10672808	scaffold_7	TPDPKTLRRLAQNREAARKSRLRKKAYVQQLETSRIKLTQLEQELQRARSQGMFFGGGIVGGDQQGLPLGMNS	249	321	546	MGFSREFNFAEDEEEEKGEQILLETRLLASARTSSAFMASSIQGNNQLEQQQQQQQQHHHHHQQQHHQIQDHHHHQHQQQQQIQYGMMQSSSSNIPAGNFISKDSGAYDLGELDQALFLYLDGQSQDHHNSSSTATTTTTHHLHQDTQRHHQNNSLSGMRPPTLNIFPSQPMHVEPPSTKAAGTGLVSPAAMSGSKRPSEPSMELANPRKDASAPAPSSRPQEPAKAIKREGNRKGPTTSSSEQEGPKTPDPKTLRRLAQNREAARKSRLRKKAYVQQLETSRIKLTQLEQELQRARSQGMFFGGGIVGGDQQGLPLGMNSISSDAAVFDIEYARWQEEHHRLMCELRAAVQEHLPENELRLFVDNCLAHYDEVMNLKSMVAKTDVFHIVSGMWKTPAE…
ppa004537m	10004712	10010767	scaffold_6	QLDAKTLRRLAQNREAARKSRLRKKAYVQQLETSRIKLTQLEQDLQRARAQGLFLGGCGGGLGN	197	260	454	MASHRVGETATGLSESGPSNHHVPYAVLHGMNAPSTSFLNQEGSAFDFGELEEAIARQVRNDEAQAPLFTGRPAATLEMFPSWPMRFHQTPRGSSKSGGESTDSGSQVNTLTSKGEGGQLEPESPISKKASSSDHQQTFDQKHLQFQQQQQLQAQDMAISDSSRGGAVGVGASQSQSAAKPSQEKRKGAGSTSENKQLDAKTLRRLAQNREAARKSRLRKKAYVQQLETSRIKLTQLEQDLQRARAQGLFLGGCGGGLGNISSGAAIFDMEYARWLEDDHRHMSELRTGLQAHLSDSDLRVIVDGYISHYDEIFQLKGVAAKSDVFHLITGMWTTPAERCFLWMGGFRPSELIKMLTAQLDPLTEQQFMGIYSLQQSSQQAEEALTQGLEQLHQSLVDT…
ppa018386m	17775387	17776540	scaffold_7	SGGDRRHNRMIKNRESAARSRARKQEFLLFLCFGLSFAFYAYTNELELEVAHLMEENTRLKRQQEQLCFAAASQQPKKHN	225	304	313	MLSSTSTGRGSSDQTNYNTTSNNSTNTPKRVASSSTNSSWSSSSPSPFSHQPFSLQTPQRTMEEVWKDINLASLSETTPNRRSSLLHHINLPHGTHDPNFRNLQDFLARPFSHNEPPVSLVSTPTEQATLNSPASPPLPPPGPPPVLSLTNSGSDHFQLFYVSDPLIRPPSSEFHPHHRQSNPNNISSSVSNSFSASPFESLAASSSGLPSFGKRAFPDSDHSNSGGDRRHNRMIKNRESAARSRARKQEFLLFLCFGLSFAFYAYTNELELEVAHLMEENTRLKRQQEQLCFAAASQQPKKHNLHRSSTAPF
ppa016271m	15390968	15393270	scaffold_4	KIDPKRVKRILANRQSAQRSRVRKLQYISELERSVTSLQAEVSVLSPRVAFLDHQRLLLNVDNSA	181	245	313	MAQLPPKIPSMTPSWPDFSHQKMPPMGHFAPNGNAPAVNATTASQNSCWVDEFIDFSSARRGSHRRSVSDSITFLETPMQDECRAPHGSHPNNHEFDRFDDEQFMSMFTTEEISAAAAAAGPTGSSSNPSSPSDHNSINEDEKEADAPHHKQLKNESEEVESQCEQPNPNDTTKSKSNDRKIDPKRVKRILANRQSAQRSRVRKLQYISELERSVTSLQAEVSVLSPRVAFLDHQRLLLNVDNSALKQRIAALAQDKIFKDAHQEALKREIERLRQVYHQQNLKKMENVAQSPTPPSDTITTPEKEQLLNVSS
ppa019868m	911422	912156	scaffold_2	EHSVPRPRRRRPSRNREAVRKYREKKKAHTAYLEEEVKKLRLLNQQLVRKIQGQAILETEFLRLKSVFLD	66	135	217	MDDGEVGTSDQAVDTFVDEFLKNTRTCTHTHTCNPPGPDAAHTHTCYHTHTQVLPSEDDDGAKNKEHSVPRPRRRRPSRNREAVRKYREKKKAHTAYLEEEVKKLRLLNQQLVRKIQGQAILETEFLRLKSVFLDLRGKIDHELGAFPFQNQYLPCFCSPVGPSMQASISTSAKAMVPVGGNCQPAVIDCQANTNEMASAVQNSTHSRNLGIIGNRS
ppa005279m	7042597	7050300	scaffold_7	PGDQKTLRRLAQNREAARKSRLRKKAYVQQLESSRLKLTQLEQELQRARQQGIFISSSGDQSHS	180	243	469	MGSRTVKTGANDGNKVVTEMPSFVPPVPTSNPTGTEGSTIRSSRISDFGTLEQTLGFRIEDAVDIGRSPVFNQNKLSSQALGSSDAQFGSLNKFLASLDINLSVCIVGSQLLPLQKEAQQNLPSVSRSNHENWGESSMADGSPRTDTSTDDTEDKNQRTELNQMTGLLVSDSSDRSKEKPGDQKTLRRLAQNREAARKSRLRKKAYVQQLESSRLKLTQLEQELQRARQQGIFISSSGDQSHSMSGNGALAFDVEYARWLEEHNRQINELRAAVNSHAGDTELRTVIDNVIAHYDDIFRLKGTAAKADVFHILSGMWKTPAERCFMWIGGFRSSELLKLLVNQLEPLTEQQLVGIYNLQQSSQQAEDALSQGMEALQQSLAETLASGSPGPSGSSGNVA…
ppa019842m	29031564	29034872	scaffold_1	SGDQKTLRRLAQNREAARKSRLRKKAYVQQLENSRLRLSHLEQELQRARQQGMFIATGLSGDNGHSMAGNGA	174	245	464	MQSFKAASTNPELYSHSSFYFRGDDTNRNQTRFTDLGELEQSATVFPHDDAVDLIPSSMFSLKANNVAVVPNNLHYGALNTSTGCLDIGSTITGTGGGCVETGHHQYMYHQQKGTTSSGNGHFENWGDSAMADNSQQTDDTSTDVDTDDKNQLHGIPHGALTVVDSMEQPRERSGDQKTLRRLAQNREAARKSRLRKKAYVQQLENSRLRLSHLEQELQRARQQGMFIATGLSGDNGHSMAGNGALAFDLEYARWLDEHQRLIHDMRSAVNSHTGDNELRILVDSVMTHYDEIFRLKSIAAKTDVFHMLSGMWKTPAERCFMWLGGFRSSELLKILGNQLEPLTDQQLMGICNLQQSSQQAEDALSQGMEALQQSLVDTLCSGTHGPTGSGNVADYMGQ…
ppa007645m	23579606	23582610	scaffold_2	TVDPKRAKRILANRQSAARSKERKARYISELERKVQTLQTEATTLSAQLTLFQRDTTGLSTENSE	155	219	360	MQDPANPKPDPSSSSQASQRPRMTTPFPDASPSLSFRGSYHRRAQSEVQFRIPDDLDLLQDPFDGPSGSFEELGGSEDDLFCTYMDIEKLGSKLDDGPSDPKVENPGGSAETGVELGGEMSARPRHRHSNSVDASLDSIEAKKAMAPDKLAELWTVDPKRAKRILANRQSAARSKERKARYISELERKVQTLQTEATTLSAQLTLFQRDTTGLSTENSELKLRVQAMEQQAQLRDALNDALKKELERLKIATGEVLTHTDSYNMGMHQSPYSQSPFFPSQSQAGQRDSQNIHMPQFHPFQPNMSAPHQPMLSAAQSHACSDMLQQDSIGRFQGLDISNRGSHLVRPEGPSISAGESNRRF
ppa006097m	2145501	2148236	scaffold_6	NLDPKRAKRILANRQSAARSKERKARYIQELERKVQTLQTEATTLSAQLTLFQRDTTGLSTENTE	224	288	427	MSTETRPMQDPQQHQSNPNPKFISINNASSNNPNPKSNPIPLPRSIGISNNANASGVAATSSSSSSLTSLTLTMLGNSNAPKPFIREEAGAAAAAEAGPHHHNSHRRAHSEVSFRLPQDMMDLSAPDQSKGGSSTASLEEMGSEEDLFSTYIDLDKLGPNGGPDDGSGEPNVNDGGGGEGEEKRSSRHRHSCSVDGSSTSTGVFGEVMEAKKAMPPDKLAELWNLDPKRAKRILANRQSAARSKERKARYIQELERKVQTLQTEATTLSAQLTLFQRDTTGLSTENTELKLRLQAMEQQAQLRDALNEALKKEVERLKIATGEMMSPSESFNLGMHQMPYNHPSAYFPLQQQPGPAGHQNMQMPQFNHSQSNMPTHLLHQSNSHTFSDIMQNGPVGQLQ…
ppa009913m	16448866	16450979	scaffold_8	ESGEKKSKKRPLGNREAVRKYREKKKARAASLEDEVVRLRTLNQQLLKRLQGQAALEAEIARLKCLLVD	87	155	272	MEDGELDFSNQEMFSGPNMGGEHPSSCSMDSFFDDLLKDTHACTHTHTCNPPGPDYSHTHTCFHVHTKIVSSATGSEDKAGTDDTAESGEKKSKKRPLGNREAVRKYREKKKARAASLEDEVVRLRTLNQQLLKRLQGQAALEAEIARLKCLLVDIRGRIEGEIGSFPYQKSVNPNLPNPNIPSAYVMNPCNLQRDDQLYCLHQGADGKCGDGAVMNGQGFSGCDFENLQCLVNQDGGYKELSGCGLGNGVSNGNSSATNKRKGGARAAAAN
ppa008311m	434354	435874	scaffold_5	DDPISKKRRRQLRNKDAAVRSRERKKIYVRDLEMKSKYLEGECRRLGRLLQCCYAENHALRLGLQM	149	214	337	MELEGDVGFLDENDIIGEIDWDFLFDGSNTLEDVLELENPVVTATGSSSPSPSSTVEDAPSDSSPDWIGEIETILMKDDDVNGNQVVPDSVEPTNAEYYEKFLADVLVDSPSTDAGSNASADSEKEKLDRSPLNDDDDDDDDAADADADDPISKKRRRQLRNKDAAVRSRERKKIYVRDLEMKSKYLEGECRRLGRLLQCCYAENHALRLGLQMNNAYGHGHGVLATKQESAVLLLELLLLGSLLRCLDIMCLVALPLILMAGLRNPLNNVAANKDLENVDLRPRGAASKMFQHSVLLCFSKSRRCKASRTKMKHSRFPCLLGSYVSFALPLLMLAT
ppa008658m	2385293	2388997	scaffold_8	LIDPKRAKRILANRQSAARSKERKVRYTNELERKVQTLQTEATTLSAQVTLLQRDTTVITAENKE	163	227	323	MSETPQRGSHHRRAHSDTSFRIPNFDDLLLFDPSDLDLSCLPSPPVLPRSSNPMTQDSDDSSGPPNPFSSSRPGGPTSSGSTAAAAHLRSLSVDSDFFDGLGLGTGGDSGREALGGQRSGSHHRHSNSMDGSFTPSFEADSPVIVVDGIKKSIAPERLAELSLIDPKRAKRILANRQSAARSKERKVRYTNELERKVQTLQTEATTLSAQVTLLQRDTTVITAENKELKLRLQAMEQQAQLRDALNEKLKEEVQRLKIETNQIPPGNGNPFYRGLPPQYATPQSSSHHQLGSGQTQQHHHMLHNQAVSNGQARPSFMDFNQRA
ppb020445m	17559294	17560265	scaffold_8	RHDPKRAKRIMTNRRSAMKAKQRKKMYVSALEYNLERLYCEAAALSARLNLWMYDLEQQLEQ	31	92	121	MADSTPPKNHSASSITSMKKNPPAVLADMARHDPKRAKRIMTNRRSAMKAKQRKKMYVSALEYNLERLYCEAAALSARLNLWMYDLEQQLEQHCSSGNYFLNPKWLCFFINIVDIVLTLST
ppa006939m	42911190	42917866	scaffold_1	ETDAKRAKQQFAQRSRVRKLQYIAELERNVQALQAEGSGVTAELEFLNQQNLILSMENKA	232	291	389	MANSKSSNIRNFMYSGKHPLLPPKSPFPSVSPSYADYVLSPAFGSKTVQKPREGNAHHQRTSSESLLIEEQPSWLDDLLNEPDTPIRRGGHRRSSSDSFAYVDTSNASNIDYAAQDEYKYHHMISAPSWGSHDFDPQKDLRHASLYTELNLVKQKNKAWESSLNSVNNMSSLPSVKDNIVLQSSGSLSTPQEADGFASTASEKQDQVESGPHDPKASSEKKDNSNAKLYASETDAKRAKQQFAQRSRVRKLQYIAELERNVQALQAEGSGVTAELEFLNQQNLILSMENKALKQRLESIAQEQLIKYLEQELLEREIGRLRALYQQQQQHHQQQQQQQQQQQQQQQQQQPSSSHRRSNSKDLDSQFANLSLKHKDANAGRDPVTGTLRI
ppa003901m	14395897	14399921	scaffold_7	EKEERRIRRILANRESARQTIRRRQALCEELTRKAADLALENENLKKKKELALKEYQSLEKTNKH	180	244	541	MVSSERRSFSSSTGSTAAASSSSSSSGSATGVSVDRFGGAADRMVKEELEAAEALADLAHLAMRESSGAESAGNWGLKGKRAKKRVKSESPPGHLGLNPVDPVPTCPDLSQQDQAVTGLRQCETVCTNVVTELLKTEQVLSNEIVKAEHDAEVTKLSPICTTSYPSFSCSKSRRNLTEEEKEERRIRRILANRESARQTIRRRQALCEELTRKAADLALENENLKKKKELALKEYQSLEKTNKHLKVQMAKVIKAEVEETPSENMSAYVQMQIPPSSPSNSPLFLFNRPPFTPVFWPSIIQSSNSVQLQHVSQNPMAIPSNIPLPANGTADSSHEQENPLTNNGTRTPLYVFPCPWFIPHFDNGNGLQPQSSLCLNNKQEETSFNNQYSASSSSRTVAQ…
