# Supplementary material for: Divergence of the bZIP Gene Family in Strawberry, Peach, and Apple Suggests Multiple Modes of Gene Evolution after Duplication
Source: Int J Genomics. 2015 Dec 7;2015:536943. doi: 10.1155/2015/536943 (PMC4685131; doi:10.1155/2015/536943)
Supplement: Supplementary file 1 — Figure S1. Phylogenetic tree constructed by the neighbor-joining method using protein sequences of the bZIP-domains in strawberry, apple, peach, and A. thaliana. Only bootstrap values larger than 50% are indicated. Different colors can be used to distinguish the different subgroups. The names of each subgroup are listed on the right. Table S1. bZIP genes in C. sativus, M. truncatula, P. trichocarpa, B. rapa, C. papaya, T. cacao, S. lycopersicum, M. acuminata, S. moellendorffii, P. patens, C. reinhardtii, C. merolae, and S. cerevisiae. Table S2. bZIP genes in strawberry, apple and peach. Gene name, chromosomal location, sequence and location of bZIP-domain, sequence of the full-length protein. Table S3. Ka/Ks ratio of bZIP genes in clade A-S. Table S4. Ka/Ks ratio of bZIP orthologs and paralogs in clades A-S. Table S5. Ka/Ks ratios of bZIP domains, BR and LZ domains in clades A-S. Table S6. Orthologous gene pairs of bZIP genes in strawberry, apple and peach. Gene name, clade, location, ORF length, and number of exons (Fv–strawberry; Md–apple; Pp–peach). Table S7. Orthologous chromosomes in strawberry, apple and peach (FC–strawberry chromosome; MC–apple chromosome; PC–peach chromosome). [file 536943.f1.zip › 536943.f1/Supplementary/Table S3.xlsx]

## Sheet: 整理
Table S3. Ka/Ks ratio of bZIP genes in clades A-S
Clade A			Clade B			Clade C			Clade D			Clade E			Clade F			Clade G			Clade H			Clade I			Clade S
Gene 1	Gene 2	Ka/Ks	Gene 1	Gene 2	Ka/Ks	Gene 1	Gene 2	Ka/Ks	Gene 1	Gene 2	Ka/Ks	Gene 1	Gene 2	Ka/Ks	Gene 1	Gene 2	Ka/Ks	Gene 1	Gene 2	Ka/Ks	Gene 1	Gene 2	Ka/Ks	Gene 1	Gene 2	Ka/Ks	Gene 1	Gene 2	Ka/Ks
MDP0000129112	MDP0000144105	0.398964	MDP0000138811	MDP0000299504	-2	MDP0000176747	MDP0000275309	0.262472	MDP0000121258	MDP0000274723	0.460435	MDP0000133698	MDP0000267964	0.688917	MDP0000159670	MDP0000319187	0.57988	MDP0000138052	MDP0000185553	0.528523	MDP0000219041	MDP0000264514	0.243081	MDP0000120158	MDP0000293847	0.728483	MDP0000140166	MDP0000205823	1.8991
MDP0000129112	MDP0000177486	0.405318	MDP0000138811	MDP0000378041	0.413737	MDP0000176747	ppa005367m	0.344395	MDP0000121258	MDP0000277999	0.139254	MDP0000133698	ppa006939m	0.285743	MDP0000190186	MDP0000159670	0.114014	MDP0000138052	MDP0000197219	0.324417	MDP0000219041	mrna11666	0.14785	MDP0000120158	MDP0000295681	1.58001	MDP0000140166	MDP0000234798	1.72471
MDP0000129112	MDP0000231542	0.6195	MDP0000138811	mrna03633	0.329674	MDP0000176747	ppa005476m	0.343745	MDP0000121258	MDP0000300532	0.459045	MDP0000133698	ppa022385m	0.128907	MDP0000190186	MDP0000319187	0.268285	MDP0000138052	MDP0000231274	0.472537	MDP0000279891	MDP0000219041	1.01966	MDP0000120802	MDP0000129203	0.875768	MDP0000140166	MDP0000239026	1.89815
MDP0000129112	MDP0000248567	0.742451	MDP0000180785	MDP0000138811	0.340759	MDP0000270365	MDP0000176747	0.293266	MDP0000121258	MDP0000307943	0.136627	MDP0000134936	MDP0000133698	0.133166	MDP0000190186	MDP0000772633	0.538669	MDP0000138052	MDP0000251332	0.431856	MDP0000279891	MDP0000264514	0.157342	MDP0000120802	MDP0000210251	0.858184	MDP0000140166	MDP0000249561	2.36363
MDP0000129112	MDP0000273211	0.412003	MDP0000180785	MDP0000270677	-2	MDP0000270365	MDP0000275309	0.291068	MDP0000121258	MDP0000320524	0.226237	MDP0000134936	MDP0000267964	0.824537	MDP0000190186	MDP0000893802	-2	MDP0000138052	MDP0000286846	0.451838	MDP0000279891	MDP0000586302	0.138032	MDP0000120802	MDP0000234166	1.60747	MDP0000140166	MDP0000265875	2.08592
MDP0000129112	MDP0000296303	0.902887	MDP0000180785	MDP0000299504	0.340759	MDP0000270365	mrna08186	0.378409	MDP0000121258	mrna14220	0.209808	MDP0000134936	mrna27194	0.247196	MDP0000190186	MDP0000898701	-2	MDP0000138052	mrna18928	0.805825	MDP0000279891	MDP0000834642	0.509495	MDP0000120802	MDP0000247372	0.8338	MDP0000140166	MDP0000437680	1.33287
MDP0000129112	MDP0000701734	0.66929	MDP0000180785	MDP0000378041	0.242614	MDP0000270365	ppa005367m	0.367876	MDP0000121258	mrna21882	0.155909	MDP0000134936	ppa022385m	0.13462	MDP0000190186	mrna07554	0.18033	MDP0000138052	mrna29546	0.419744	MDP0000279891	mrna11666	0.166133	MDP0000120802	MDP0000280559	0.251439	MDP0000140166	MDP0000448715	2.09673
MDP0000129112	MDP0000740787	0.975836	MDP0000180785	mrna03633	0.327737	MDP0000270365	ppa005476m	0.363041	MDP0000121258	mrna31322	0.188675	MDP0000137206	ppa006939m	0.290603	MDP0000190186	mrna11979	0.513108	MDP0000138052	ppa006173m	0.316639	MDP0000279891	mrna22776	0.136954	MDP0000120802	MDP0000282828	0.22493	MDP0000140166	MDP0000521934	1.88901
MDP0000129112	mrna09110	1.10423	MDP0000180785	ppa002181m	0.375518	MDP0000275309	ppa005367m	0.308691	MDP0000121258	ppa007593m	0.126641	MDP0000178326	MDP0000267964	0.286438	MDP0000190186	ppa009913m	0.235162	MDP0000138052	ppa006484m	0.398127	MDP0000279891	ppa011967m	0.274033	MDP0000120802	MDP0000300820	0.223424	MDP0000140166	MDP0000905135	1.51065
MDP0000129112	mrna30280	0.493194	MDP0000270677	MDP0000138811	0.336325	MDP0000275309	ppa005476m	0.307888	MDP0000145555	mrna03778	0.414658	MDP0000178326	MDP0000555457	0.171861	MDP0000190186	ppa019868m	0.555483	MDP0000138052	ppa008024m	0.487465	MDP0000586302	MDP0000264514	-2	MDP0000120802	MDP0000479652	0.232872	MDP0000140166	MDP0000917315	1.43519
MDP0000129112	ppa006503m	1.23765	MDP0000270677	MDP0000299504	0.336325	MDP0000431572	MDP0000176747	0.307037	MDP0000145555	mrna14220	0.072822	MDP0000178326	mrna27194	0.204453	MDP0000772633	MDP0000159670	0.232399	MDP0000185553	mrna13716	0.396054	MDP0000834642	MDP0000219041	0.301856	MDP0000120802	MDP0000602946	1.19332	MDP0000140166	MDP0000949327	1.72471
MDP0000129112	ppa008716m	0.485154	MDP0000270677	MDP0000378041	0.242614	MDP0000431572	MDP0000270365	0.476961	MDP0000145555	mrna21882	0.174646	MDP0000178326	ppa022385m	0.116442	MDP0000772633	MDP0000319187	0.308475	MDP0000185553	ppa006484m	0.247705	MDP0000834642	mrna11666	0.222363	MDP0000120802	mrna01680	0.353943	MDP0000140166	mrna02284	1.48684
MDP0000129112	ppa019833m	0.400234	MDP0000270677	mrna03633	0.325892	MDP0000431572	MDP0000441891	-2	MDP0000145555	ppa005279m	0.129229	MDP0000306302	MDP0000178326	-1	MDP0000772633	mrna07554	0.154388	MDP0000197219	MDP0000185553	0.655079	MDP0000834642	mrna22776	0.19745	MDP0000120802	mrna08484	0.163805	MDP0000140166	mrna14942	2.00858
MDP0000144105	MDP0000177486	-2	MDP0000270677	ppa002181m	0.372573	MDP0000431572	mrna08186	0.408749	MDP0000145555	ppa019842m	0.166428	MDP0000306302	MDP0000267964	0.276083	MDP0000772633	ppa009913m	0.198604	MDP0000197219	MDP0000231274	0.430365	mrna11666	MDP0000264514	0.0886697	MDP0000120802	mrna21344	0.717054	MDP0000140166	mrna15193	1.93374
MDP0000144105	MDP0000231542	0.348445	MDP0000299504	MDP0000378041	0.413737	MDP0000431572	mrna08757	0.308747	MDP0000250967	MDP0000145555	0.29118	MDP0000306302	MDP0000555457	0.14823	MDP0000893802	MDP0000159670	0.114014	MDP0000197219	MDP0000251332	0.378917	mrna11666	MDP0000586302	0.0911563	MDP0000120802	mrna23487	1.24482	MDP0000140166	mrna18282	1.38566
MDP0000144105	MDP0000248567	1.49012	MDP0000299504	mrna03633	0.329674	MDP0000431572	mrna16561	0.546089	MDP0000250967	mrna03778	0.382244	MDP0000306302	mrna27194	0.146815	MDP0000893802	MDP0000319187	0.268285	MDP0000197219	MDP0000286846	0.528802	mrna11666	ppa012064m	0.0721029	MDP0000120802	mrna28103	0.716655	MDP0000140166	mrna21832	1.58215
MDP0000144105	MDP0000296303	1.87253	mrna03633	MDP0000378041	0.250477	MDP0000431572	ppa005585m	0.425622	MDP0000250967	mrna21882	0.120539	MDP0000306302	ppa022385m	0.0693914	MDP0000893802	MDP0000772633	0.538669	MDP0000197219	mrna13716	0.470398	mrna22776	MDP0000219041	0.196889	MDP0000120802	ppa003452m	0.28995	MDP0000140166	mrna26148	1.85956
MDP0000144105	MDP0000701734	1.14357	ppa002181m	MDP0000138811	0.377242	MDP0000441891	MDP0000176747	0.307037	MDP0000250967	ppa019842m	0.172786	MDP0000555457	MDP0000134936	0.126191	MDP0000893802	MDP0000898701	-2	MDP0000197219	mrna18928	1.20191	ppa011967m	MDP0000219041	0.279745	MDP0000120802	ppa005999m	1.57389	MDP0000140166	ppa012281m	1.17606
MDP0000144105	mrna09110	0.953105	ppa002181m	MDP0000299504	0.377242	MDP0000441891	MDP0000270365	0.476961	MDP0000262210	MDP0000536881	0.13166	MDP0000555457	MDP0000137206	0.500551	MDP0000893802	mrna07554	0.18033	MDP0000197219	mrna29546	0.231002	ppa011967m	MDP0000834642	0.251399	MDP0000120802	ppa006097m	0.975491	MDP0000140166	ppa012507m	1.82907
MDP0000144105	mrna30280	0.192924	ppa002181m	MDP0000378041	0.24677	MDP0000441891	mrna08186	0.408749	MDP0000262210	ppa005279m	0.110776	MDP0000555457	MDP0000267964	0.296604	MDP0000893802	mrna11979	0.513108	MDP0000197219	ppa006173m	0.321007	ppa011967m	mrna22776	0.260352	MDP0000120802	ppa008658m	0.838812	MDP0000140166	ppa012739m	1.5315
MDP0000144105	ppa006503m	1.10773	ppa002181m	mrna03633	0.28328	MDP0000441891	mrna08757	0.308747	MDP0000274723	MDP0000277999	0.0941495	MDP0000555457	mrna27194	0.217171	MDP0000893802	ppa009913m	0.235162	MDP0000197219	ppa006484m	0.509028	ppa012064m	MDP0000264514	0.25789	MDP0000129203	MDP0000120158	0.241786	MDP0000140166	ppa013020m	2.64988
MDP0000144105	ppa019833m	0.158358				MDP0000441891	mrna16561	0.546089	MDP0000274723	MDP0000300532	0.377565	MDP0000555457	ppa006939m	0.394453	MDP0000893802	ppa019868m	0.555483	MDP0000197219	ppa008024m	0.293692	ppa012064m	MDP0000586302	0.179794	MDP0000129203	MDP0000210251	-2	MDP0000140166	ppa013046m	1.6959
MDP0000169112	MDP0000144105	0.915511				MDP0000441891	ppa005585m	0.425622	MDP0000274723	MDP0000320524	0.197839	MDP0000555457	ppa022385m	0.138727	MDP0000898701	MDP0000159670	0.114014	MDP0000231274	MDP0000185553	0.34687				MDP0000129203	MDP0000293847	0.234474	MDP0000183562	MDP0000140166	1.40431
MDP0000169112	MDP0000177486	0.976712				MDP0000680042	MDP0000176747	0.316361	MDP0000274723	mrna00517	0.129355	mrna17796	MDP0000133698	0.223702	MDP0000898701	MDP0000319187	0.268285	MDP0000231274	MDP0000286846	0.231002				MDP0000129203	MDP0000295681	0.29636	MDP0000183562	MDP0000190277	1.4906
MDP0000169112	MDP0000231542	0.800334				MDP0000680042	MDP0000270365	0.462706	MDP0000274723	mrna14220	0.16546	mrna17796	MDP0000134936	0.2139	MDP0000898701	MDP0000772633	0.538669	MDP0000231274	mrna29546	0.19287				MDP0000129203	MDP0000297791	0.238918	MDP0000183562	MDP0000200822	1.52634
MDP0000169112	mrna08154	0.918043				MDP0000680042	MDP0000275309	0.329172	MDP0000274723	mrna21797	0.158442	mrna17796	MDP0000178326	0.146534	MDP0000898701	mrna07554	0.18033	MDP0000231274	ppa006484m	0.464729				MDP0000129203	MDP0000305387	0.238782	MDP0000183562	MDP0000205823	1.59458
MDP0000169112	mrna08566	0.808318				MDP0000680042	MDP0000431572	0.411836	MDP0000274723	mrna31322	0.185678	mrna17796	MDP0000267964	0.456529	MDP0000898701	mrna11979	0.513108	MDP0000239688	MDP0000138052	0.844891				MDP0000129203	mrna21344	0.265924	MDP0000183562	MDP0000234798	1.18848
MDP0000169112	mrna31321	0.845526				MDP0000680042	MDP0000441891	0.411836	MDP0000274723	ppa004537m	0.168494	mrna17796	MDP0000306302	0.129818	MDP0000898701	ppa009913m	0.235162	MDP0000239688	MDP0000185553	0.912214				MDP0000129203	mrna28103	0.266577	MDP0000183562	MDP0000239026	1.48086
MDP0000169112	ppa022266m	1.13545				MDP0000680042	mrna08186	0.444098	MDP0000274723	ppa007593m	0.149948	mrna17796	MDP0000555457	0.158453	MDP0000898701	ppa019868m	0.555483	MDP0000239688	MDP0000197219	0.646944				MDP0000129203	ppa006097m	0.311986	MDP0000183562	MDP0000249561	1.45199
MDP0000169112	ppa024363m	0.386165				MDP0000680042	mrna08757	0.310738	MDP0000277999	MDP0000536881	0.0978676	mrna17796	mrna27194	0.215127	mrna07554	MDP0000159670	0.291626	MDP0000239688	MDP0000231274	0.563062				MDP0000129203	ppa007645m	0.212388	MDP0000183562	MDP0000265875	1.59219
MDP0000169112	ppa025544m	1.10462				MDP0000680042	mrna16561	0.378731	MDP0000277999	mrna21797	0.319615	mrna17796	ppa016271m	0.141517	mrna07554	MDP0000319187	0.264031	MDP0000239688	MDP0000251332	0.590966				MDP0000141948	MDP0000120158	0.147933	MDP0000183562	MDP0000407755	1.56483
MDP0000169473	MDP0000129112	0.479118				MDP0000680042	ppa005367m	0.321997	MDP0000277999	mrna21882	0.182266	mrna17796	ppa022385m	0.192015	mrna07554	ppa009913m	0.183187	MDP0000239688	MDP0000286846	0.811854				MDP0000141948	MDP0000129203	0.39635	MDP0000183562	MDP0000437680	1.2455
MDP0000169473	MDP0000169112	0.897374				MDP0000680042	ppa005476m	0.320663	MDP0000277999	ppa003825m	0.309088	mrna27194	MDP0000133698	0.257226	mrna11979	MDP0000319187	0.253422	MDP0000239688	MDP0000386314	0.695436				MDP0000141948	MDP0000210251	0.387364	MDP0000183562	MDP0000448715	1.74489
MDP0000169473	MDP0000198495	0.667454				MDP0000680042	ppa005585m	0.168963	MDP0000277999	ppa004537m	0.240043	mrna27194	MDP0000267964	0.556627	mrna11979	MDP0000772633	0.524127	MDP0000239688	MDP0000493795	0.811863				MDP0000141948	MDP0000247372	0.389479	MDP0000183562	MDP0000521934	1.78917
MDP0000169473	MDP0000208334	0.449807				MDP0000680042	ppa007814m	0.255121	MDP0000277999	ppa005279m	0.205436	mrna27194	ppa006939m	0.267133	mrna11979	ppa009913m	0.201222	MDP0000239688	MDP0000545420	0.820093				MDP0000141948	MDP0000293847	0.243131	MDP0000183562	MDP0000738631	1.20507
MDP0000169473	MDP0000215106	0.611636				mrna08186	MDP0000176747	0.315474	MDP0000300532	MDP0000262210	0.151304	mrna27194	ppa022385m	0.2465	mrna11979	ppa019868m	0.426205	MDP0000239688	mrna13716	0.752211				MDP0000141948	MDP0000295681	0.319489	MDP0000183562	MDP0000863909	1.74372
MDP0000169473	MDP0000273211	0.529399				mrna08186	MDP0000275309	0.298793	MDP0000300532	MDP0000320524	0.668112	ppa016271m	MDP0000133698	0.147002	ppa009913m	MDP0000159670	0.308786	MDP0000239688	mrna18928	1.1373				MDP0000141948	mrna01680	1.10732	MDP0000183562	MDP0000891899	1.20264
MDP0000169473	MDP0000470928	0.471318				mrna08186	ppa005367m	0.260677	MDP0000300532	MDP0000536881	0.133758	ppa016271m	MDP0000134936	0.173047	ppa009913m	MDP0000319187	0.321362	MDP0000239688	mrna29546	0.531106				MDP0000141948	mrna08484	0.739275	MDP0000183562	MDP0000905135	0.784712
MDP0000169473	MDP0000636541	0.472492				mrna08186	ppa005476m	0.261506	MDP0000300532	mrna14220	0.192671	ppa016271m	MDP0000137206	0.217638	ppa019868m	MDP0000319187	0.185188	MDP0000239688	mrna32022	0.617363				MDP0000141948	mrna21344	0.409685	MDP0000183562	MDP0000917315	0.942152
MDP0000169473	MDP0000701734	1.11631				mrna08757	MDP0000176747	0.29627	MDP0000300532	mrna21882	0.162546	ppa016271m	MDP0000178326	0.142191	ppa019868m	MDP0000772633	0.674063	MDP0000239688	mrna32024	0.69271				MDP0000141948	mrna28103	0.359949	MDP0000183562	MDP0000949327	1.18848
MDP0000169473	MDP0000706379	0.587214				mrna08757	MDP0000270365	0.46556	MDP0000300532	ppa005279m	0.137758	ppa016271m	MDP0000267964	0.273881	ppa019868m	ppa009913m	0.190791	MDP0000239688	ppa006173m	0.940327				MDP0000141948	ppa006097m	0.200901	MDP0000183562	mrna02284	0.943259
MDP0000169473	mrna08154	0.632642				mrna08757	MDP0000275309	0.296866	MDP0000301884	MDP0000145555	-2	ppa016271m	MDP0000306302	0.134352				MDP0000239688	ppa006484m	0.724396				MDP0000141948	ppa007645m	0.462459	MDP0000183562	mrna02614	1.88073
MDP0000169473	mrna08566	0.295012				mrna08757	mrna08186	0.423392	MDP0000301884	MDP0000250967	0.29808	ppa016271m	MDP0000555457	0.165102				MDP0000239688	ppa008024m	0.348177				MDP0000210251	MDP0000120158	0.239197	MDP0000183562	mrna04187	1.6612
MDP0000169473	mrna11837	0.480416				mrna08757	mrna16561	0.445903	MDP0000301884	mrna03778	0.417212	ppa016271m	mrna27194	0.167504				MDP0000239688	ppa020524m	0.820191				MDP0000210251	MDP0000293847	0.231936	MDP0000183562	mrna04504	1.10881
MDP0000169473	mrna14556	0.434621				mrna08757	ppa005367m	0.455167	MDP0000301884	mrna14220	0.0691339	ppa016271m	ppa022385m	0.147526				MDP0000251332	MDP0000231274	0.147371				MDP0000210251	MDP0000295681	0.298486	MDP0000183562	mrna14942	1.08745
MDP0000169473	ppa008716m	0.481471				mrna08757	ppa005476m	0.45825	MDP0000301884	mrna21882	0.17185	ppa022385m	MDP0000137206	0.238853				MDP0000251332	mrna29546	0.262789				MDP0000210251	MDP0000297791	0.236491	MDP0000183562	mrna15193	1.43412
MDP0000169473	ppa018386m	0.374128				mrna08757	ppa005585m	0.567723	MDP0000301884	ppa005279m	0.125248	ppa022385m	MDP0000267964	0.528923				MDP0000251332	ppa006484m	0.284258				MDP0000210251	MDP0000305387	0.236374	MDP0000183562	mrna18282	0.939704
MDP0000169473	ppa022266m	0.629806				mrna16561	MDP0000176747	0.275949	MDP0000301884	ppa019842m	0.16977							MDP0000251332	ppa008024m	0.204616				MDP0000210251	mrna21344	0.257091	MDP0000183562	mrna21832	1.24267
MDP0000177486	MDP0000231542	0.355906				mrna16561	MDP0000270365	0.289573	MDP0000307943	MDP0000145555	0.217125							MDP0000286846	MDP0000185553	0.404276				MDP0000210251	mrna28103	0.268042	MDP0000183562	mrna26148	1.12153
MDP0000177486	MDP0000248567	1.50786				mrna16561	MDP0000275309	0.31095	MDP0000307943	MDP0000250967	0.183302							MDP0000286846	mrna13716	0.136227				MDP0000210251	ppa006097m	0.305963	MDP0000183562	ppa011366m	1.09329
MDP0000177486	MDP0000296303	1.9144				mrna16561	mrna08186	0.29901	MDP0000307943	MDP0000301884	0.212372							MDP0000286846	ppa006484m	0.182306				MDP0000210251	ppa007645m	0.207679	MDP0000183562	ppa011589m	1.79298
MDP0000177486	MDP0000701734	1.15301				mrna16561	ppa005367m	0.296679	MDP0000307943	MDP0000320322	0.138951							MDP0000386314	MDP0000138052	0.337193				MDP0000234166	MDP0000120158	0.424456	MDP0000183562	ppa011644m	1.77
MDP0000177486	mrna09110	0.928247				mrna16561	ppa005476m	0.289778	MDP0000307943	mrna00517	0.217582							MDP0000386314	MDP0000185553	0.671768				MDP0000234166	MDP0000293847	0.375297	MDP0000183562	ppa012281m	0.818939
MDP0000177486	mrna30280	0.194613				mrna16561	ppa005585m	0.401119	MDP0000307943	mrna21797	0.217855							MDP0000386314	MDP0000231274	0.605629				MDP0000234166	MDP0000295681	0.422609	MDP0000183562	ppa012507m	1.39308
MDP0000177486	ppa006503m	1.08294				ppa005476m	ppa005367m	-2	MDP0000307943	mrna21882	0.22341							MDP0000386314	MDP0000251332	0.547335				MDP0000234166	MDP0000297791	0.465333	MDP0000183562	ppa012739m	1.50143
MDP0000177486	ppa019833m	0.159926				ppa005585m	MDP0000176747	0.39269	MDP0000307943	ppa003825m	0.194293							MDP0000386314	MDP0000286846	0.661561				MDP0000234166	MDP0000305387	0.458035	MDP0000183562	ppa013020m	1.38346
MDP0000198495	MDP0000129112	0.531151				ppa005585m	MDP0000270365	0.238965	MDP0000307943	ppa004537m	0.212627							MDP0000386314	MDP0000493795	0.311555				MDP0000234166	mrna28103	0.273718	MDP0000183562	ppa013046m	1.29153
MDP0000198495	MDP0000208334	0.392684				ppa005585m	MDP0000275309	0.379795	MDP0000307943	ppa019842m	0.156053							MDP0000386314	MDP0000545420	0.317402				MDP0000234166	ppa006097m	0.49799	MDP0000183562	ppa021433m	2.05698
MDP0000198495	MDP0000248567	1.09016				ppa005585m	mrna08186	0.414035	MDP0000320322	MDP0000145555	0.201077							MDP0000386314	mrna13716	0.764588				MDP0000247372	MDP0000120158	0.252496	MDP0000190277	MDP0000140166	0.814777
MDP0000198495	MDP0000296303	0.767262				ppa005585m	ppa005367m	0.394737	MDP0000320322	MDP0000250967	0.211648							MDP0000386314	mrna18928	0.679951				MDP0000247372	MDP0000129203	0.328107	MDP0000190277	MDP0000200822	0.721868
MDP0000198495	MDP0000701734	0.687523				ppa005585m	ppa005476m	0.387749	MDP0000320322	MDP0000301884	0.195422							MDP0000386314	mrna29546	0.597043				MDP0000247372	MDP0000210251	0.319508	MDP0000190277	MDP0000205823	1.69227
MDP0000198495	MDP0000706379	0.358217				ppa007814m	MDP0000176747	0.208779	MDP0000320322	mrna00517	0.256411							MDP0000386314	mrna32022	0.699882				MDP0000247372	MDP0000293847	0.236616	MDP0000190277	MDP0000234798	1.72842
MDP0000198495	MDP0000740787	0.704413				ppa007814m	MDP0000270365	0.546265	MDP0000320322	mrna21797	0.302488							MDP0000386314	mrna32024	0.679963				MDP0000247372	MDP0000295681	0.278121	MDP0000190277	MDP0000239026	1.65852
MDP0000198495	mrna08154	0.332063				ppa007814m	MDP0000431572	0.207746	MDP0000320322	mrna21882	0.234377							MDP0000386314	ppa006173m	0.617542				MDP0000247372	MDP0000297791	0.254934	MDP0000190277	MDP0000249561	2.1131
MDP0000198495	mrna09110	0.732037				ppa007814m	MDP0000441891	0.207746	MDP0000320322	ppa003825m	0.225606							MDP0000386314	ppa006484m	0.65063				MDP0000247372	MDP0000305387	0.254994	MDP0000190277	MDP0000265875	1.84363
MDP0000198495	mrna11837	0.421358				ppa007814m	mrna08186	0.263923	MDP0000320322	ppa004537m	0.2562							MDP0000386314	ppa008024m	0.414545				MDP0000247372	mrna21344	0.339074	MDP0000190277	MDP0000437680	1.28352
MDP0000198495	mrna31321	0.520076				ppa007814m	mrna08757	0.290699	MDP0000320322	ppa005279m	0.133404							MDP0000386314	ppa020524m	0.762044				MDP0000247372	mrna28103	0.270917	MDP0000190277	MDP0000448715	1.74165
MDP0000198495	ppa024363m	0.490977				ppa007814m	mrna16561	0.55175	MDP0000320322	ppa019842m	0.185545							MDP0000493795	MDP0000138052	0.205929				MDP0000247372	ppa006097m	0.31689	MDP0000190277	MDP0000521934	1.536
MDP0000198495	ppa025544m	0.314225				ppa007814m	ppa005367m	0.293809	MDP0000320524	MDP0000262210	0.123068							MDP0000493795	MDP0000185553	0.62629				MDP0000247372	ppa007645m	0.301585	MDP0000190277	MDP0000905135	1.57993
MDP0000208334	MDP0000129112	0.381854				ppa007814m	ppa005476m	0.278795	MDP0000320524	MDP0000536881	0.110696							MDP0000493795	MDP0000197219	0.24465				MDP0000280559	MDP0000129203	0.596862	MDP0000190277	MDP0000917315	1.58586
MDP0000208334	MDP0000144105	0.482605				ppa007814m	ppa005585m	0.453299	MDP0000320524	mrna21882	0.135423							MDP0000493795	MDP0000231274	0.260515				MDP0000280559	MDP0000210251	0.617356	MDP0000190277	MDP0000949327	1.72842
MDP0000208334	MDP0000177486	0.486023							MDP0000320524	ppa005279m	0.121281							MDP0000493795	MDP0000251332	0.280498				MDP0000280559	MDP0000282828	0.31709	MDP0000190277	mrna02284	1.52604
MDP0000208334	MDP0000215106	0.374206							MDP0000536881	ppa005279m	0.104304							MDP0000493795	MDP0000286846	0.485959				MDP0000280559	MDP0000300820	0.216114	MDP0000190277	mrna14942	1.85267
MDP0000208334	MDP0000231542	0.46484							mrna00517	MDP0000145555	0.185514							MDP0000493795	MDP0000545420	-2				MDP0000280559	MDP0000479652	0.305503	MDP0000190277	mrna15193	1.78408
MDP0000208334	MDP0000296303	0.850941							mrna00517	MDP0000250967	0.247979							MDP0000493795	mrna13716	0.439565				MDP0000280559	mrna01680	0.155464	MDP0000190277	mrna18282	1.62681
MDP0000208334	MDP0000701734	0.736866							mrna00517	MDP0000301884	0.179172							MDP0000493795	mrna18928	0.971008				MDP0000280559	mrna08484	0.175086	MDP0000190277	mrna21832	1.46089
MDP0000208334	MDP0000740787	1.27909							mrna00517	mrna14220	0.0831545							MDP0000493795	mrna29546	0.215849				MDP0000280559	ppa003452m	0.207931	MDP0000190277	mrna26148	2.13029
MDP0000208334	mrna09110	0.763568							mrna00517	ppa004537m	0.214769							MDP0000493795	ppa006173m	0.329834				MDP0000282828	MDP0000300820	1.25103	MDP0000190277	ppa012281m	1.25008
MDP0000208334	ppa006503m	0.74744							mrna03778	MDP0000320524	0.0979101							MDP0000493795	ppa006484m	0.44278				MDP0000282828	mrna08484	0.160884	MDP0000190277	ppa012507m	1.47182
MDP0000208334	ppa008716m	0.474272							mrna03778	mrna14220	0.0873077							MDP0000493795	ppa008024m	0.380802				MDP0000295681	MDP0000293847	0.85372	MDP0000190277	ppa012739m	1.38151
MDP0000208334	ppa019833m	0.423002							mrna03778	mrna21882	0.138265							MDP0000545420	MDP0000138052	0.205516				MDP0000297791	MDP0000120158	0.324106	MDP0000190277	ppa013020m	2.02212
MDP0000215106	MDP0000248567	0.394126							mrna14220	MDP0000262210	0.0497893							MDP0000545420	MDP0000185553	0.6345				MDP0000297791	MDP0000293847	0.406594	MDP0000190277	ppa013046m	1.58652
MDP0000215106	MDP0000701734	0.23652							mrna14220	MDP0000320524	0.0774482							MDP0000545420	MDP0000197219	0.237721				MDP0000297791	MDP0000295681	0.348816	MDP0000200822	MDP0000140166	-2
MDP0000215106	MDP0000740787	0.605738							mrna14220	MDP0000536881	0.0369439							MDP0000545420	MDP0000231274	0.164652				MDP0000297791	MDP0000305387	-2	MDP0000200822	MDP0000205823	1.8991
MDP0000215106	mrna28250	0.379807							mrna14220	mrna21882	0.0525729							MDP0000545420	MDP0000251332	0.293958				MDP0000297791	mrna28103	0.325643	MDP0000200822	MDP0000234798	1.72471
MDP0000215106	ppa006503m	0.38582							mrna14220	ppa005279m	0.0370389							MDP0000545420	MDP0000286846	0.494004				MDP0000297791	ppa006097m	0.341342	MDP0000200822	MDP0000239026	1.89815
MDP0000215106	ppa006752m	0.530282							mrna21797	MDP0000262210	0.247749							MDP0000545420	mrna13716	0.452454				MDP0000300820	mrna08484	0.147986	MDP0000200822	MDP0000249561	2.36363
MDP0000215106	ppa022266m	0.18518							mrna21797	MDP0000536881	0.269959							MDP0000545420	mrna18928	1.00063				MDP0000305387	MDP0000120158	0.323554	MDP0000200822	MDP0000265875	2.08592
MDP0000231542	MDP0000296303	1.85527							mrna21797	mrna21882	0.216829							MDP0000545420	ppa006173m	0.323794				MDP0000305387	MDP0000293847	0.405897	MDP0000200822	MDP0000437680	1.33287
MDP0000231542	MDP0000701734	1.70661							mrna21797	ppa004537m	0.0926158							MDP0000545420	ppa006484m	0.451546				MDP0000305387	MDP0000295681	0.348035	MDP0000200822	MDP0000448715	2.09673
MDP0000231542	MDP0000740787	0.943854							mrna21797	ppa005279m	0.333618							MDP0000545420	ppa008024m	0.364179				MDP0000305387	mrna28103	0.32348	MDP0000200822	MDP0000521934	1.88901
MDP0000231542	mrna09110	1.16282							mrna21797	ppa019842m	0.212774							mrna02177	MDP0000138052	1.18006				MDP0000305387	ppa006097m	0.33748	MDP0000200822	MDP0000905135	1.55458
MDP0000231542	mrna30280	0.183089							mrna21882	MDP0000262210	0.254214							mrna02177	MDP0000185553	0.942526				MDP0000435971	MDP0000120158	0.327901	MDP0000200822	MDP0000917315	1.38011
MDP0000231542	ppa006503m	1.06039							mrna21882	MDP0000536881	0.0970711							mrna02177	MDP0000197219	1.24221				MDP0000435971	MDP0000234166	0.225564	MDP0000200822	MDP0000949327	1.72471
MDP0000231542	ppa019833m	0.13447							mrna21882	ppa005279m	0.118397							mrna02177	MDP0000231274	0.465209				MDP0000435971	MDP0000293847	0.300213	MDP0000200822	mrna02284	1.48684
MDP0000248567	ppa006752m	0.243908							mrna31322	MDP0000262210	0.209518							mrna02177	MDP0000251332	0.722741				MDP0000435971	MDP0000295681	0.396852	MDP0000200822	mrna14942	2.00858
MDP0000250947	MDP0000144105	0.414165							mrna31322	MDP0000277999	0.230894							mrna02177	mrna13716	1.08165				MDP0000435971	MDP0000297791	0.310071	MDP0000200822	mrna15193	1.93374
MDP0000250947	MDP0000177486	0.397791							mrna31322	MDP0000300532	0.293032							mrna02177	mrna29546	0.732996				MDP0000435971	MDP0000305387	0.294462	MDP0000200822	mrna18282	1.38731
MDP0000250947	MDP0000740787	0.903344							mrna31322	MDP0000320322	0.159623							mrna02177	mrna32022	0.695992				MDP0000435971	mrna01680	0.441969	MDP0000200822	mrna21832	1.58215
MDP0000250947	mrna09110	0.383185							mrna31322	MDP0000536881	0.212505							mrna02177	mrna32024	0.823119				MDP0000435971	mrna23487	0.160108	MDP0000200822	mrna26148	1.78275
MDP0000250947	mrna28250	0.710686							mrna31322	mrna00517	0.132143							mrna02177	ppa006173m	1.07068				MDP0000435971	mrna28103	0.252775	MDP0000200822	ppa012281m	1.20946
MDP0000250947	mrna30280	0.51912							mrna31322	mrna21797	0.218949							mrna02177	ppa006484m	0.949582				MDP0000435971	ppa005999m	0.102048	MDP0000200822	ppa012507m	1.82907
MDP0000250947	mrna31321	0.389561							mrna31322	mrna21882	0.216721							mrna02177	ppa008024m	0.77943				MDP0000435971	ppa006097m	0.392873	MDP0000200822	ppa012739m	1.5315
MDP0000250947	ppa006752m	0.559107							mrna31322	ppa003825m	0.247926							mrna02177	ppa020524m	0.878015				MDP0000479652	MDP0000282828	0.44737	MDP0000200822	ppa013020m	2.64988
MDP0000250947	ppa019833m	0.434516							mrna31322	ppa004537m	0.216935							mrna13716	ppa006484m	0.124728				MDP0000479652	MDP0000300820	0.273426	MDP0000200822	ppa013046m	1.6959
MDP0000250947	ppa024363m	0.269252							mrna31322	ppa005279m	0.122112							mrna18928	MDP0000185553	1.30209				MDP0000479652	mrna01680	0.105598	MDP0000205823	MDP0000905135	0.769685
MDP0000273211	MDP0000215106	0.588561							mrna31621	MDP0000121258	0.235814							mrna18928	MDP0000231274	0.561386				MDP0000479652	mrna08484	0.16421	MDP0000205823	MDP0000917315	0.896928
MDP0000273211	MDP0000248567	0.178689							mrna31621	MDP0000274723	0.240775							mrna18928	MDP0000251332	1.09117				MDP0000602946	MDP0000120158	0.267987	MDP0000205823	mrna18282	1.17964
MDP0000273211	MDP0000701734	0.233634							mrna31621	MDP0000277999	0.069214							mrna18928	MDP0000286846	1.08004				MDP0000602946	MDP0000129203	0.384744	MDP0000205823	mrna26148	1.36182
MDP0000273211	MDP0000740787	0.660263							mrna31621	MDP0000300532	0.286127							mrna18928	mrna13716	1.08243				MDP0000602946	MDP0000141948	0.718974	MDP0000205823	ppa012281m	0.866481
MDP0000273211	ppa006503m	0.38141							mrna31621	MDP0000307943	0.149469							mrna18928	mrna29546	0.667993				MDP0000602946	MDP0000210251	0.376114	MDP0000234798	MDP0000205823	1.34357
MDP0000273211	ppa006752m	0.513378							mrna31621	MDP0000320524	0.176292							mrna18928	ppa006484m	1.17804				MDP0000602946	MDP0000234166	0.324647	MDP0000234798	MDP0000239026	1.24069
MDP0000273211	ppa022266m	0.182528							mrna31621	mrna14220	0.163834							mrna18928	ppa008024m	0.581891				MDP0000602946	MDP0000247372	0.356975	MDP0000234798	MDP0000249561	1.46497
MDP0000296303	MDP0000248567	0.150291							mrna31621	mrna31322	0.1473							mrna29546	MDP0000185553	0.435494				MDP0000602946	MDP0000293847	0.383028	MDP0000234798	MDP0000265875	1.39312
MDP0000296303	mrna09110	0.198842							mrna31621	ppa004537m	0.150916							mrna29546	MDP0000286846	0.428021				MDP0000602946	MDP0000295681	0.290142	MDP0000234798	MDP0000437680	1.87543
MDP0000296303	mrna28250	0.215128							mrna31621	ppa007578m	0.232211							mrna29546	mrna13716	0.216781				MDP0000602946	MDP0000435971	0.274807	MDP0000234798	MDP0000448715	1.08188
MDP0000296303	ppa006752m	0.114364							mrna31621	ppa007593m	0.147131							mrna29546	ppa006484m	0.526035				MDP0000602946	mrna01680	1.00351	MDP0000234798	MDP0000521934	1.06098
MDP0000470928	MDP0000169112	0.887719							ppa003825m	MDP0000145555	0.179175							mrna32022	MDP0000138052	0.447716				MDP0000602946	mrna21344	0.456955	MDP0000234798	MDP0000905135	1.04162
MDP0000470928	MDP0000198495	0.727769							ppa003825m	MDP0000250967	0.244725							mrna32022	MDP0000185553	0.517361				MDP0000602946	mrna28103	0.520184	MDP0000234798	MDP0000917315	1.06418
MDP0000470928	MDP0000208334	0.207042							ppa003825m	MDP0000301884	0.172474							mrna32022	MDP0000197219	0.363637				MDP0000602946	mrna32629	0.365574	MDP0000234798	MDP0000949327	-2
MDP0000470928	MDP0000215106	0.363109							ppa003825m	mrna00517	0.237495							mrna32022	MDP0000231274	0.413563				MDP0000602946	ppa005999m	0.218699	MDP0000234798	mrna02284	1.88503
MDP0000470928	MDP0000250947	0.507455							ppa003825m	mrna03778	0.124463							mrna32022	MDP0000286846	0.492166				MDP0000602946	ppa006097m	0.322409	MDP0000234798	mrna14942	1.11777
MDP0000470928	MDP0000273211	0.500039							ppa003825m	mrna21797	0.308905							mrna32022	MDP0000493795	0.467098				MDP0000602946	ppa007645m	0.409033	MDP0000234798	mrna15193	1.07802
MDP0000470928	MDP0000636541	0.470804							ppa003825m	mrna21882	0.157519							mrna32022	MDP0000545420	0.473227				MDP0000602946	ppa008658m	0.329151	MDP0000234798	mrna18282	1.52675
MDP0000470928	MDP0000706379	0.631565							ppa003825m	ppa004537m	0.281976							mrna32022	mrna13716	0.627981				mrna01680	MDP0000120158	0.651647	MDP0000234798	mrna21832	1.44192
MDP0000470928	mrna08154	0.58334							ppa004537m	MDP0000262210	0.251551							mrna32022	mrna18928	2.04066				mrna01680	MDP0000129203	1.05189	MDP0000234798	mrna26148	1.51283
MDP0000470928	mrna08566	0.514226							ppa004537m	MDP0000536881	0.247628							mrna32022	mrna32024	0.969984				mrna01680	MDP0000210251	1.04059	MDP0000234798	ppa012281m	0.941042
MDP0000470928	mrna11837	0.474615							ppa004537m	mrna14220	0.101075							mrna32022	ppa006173m	0.631066				mrna01680	MDP0000247372	0.558856	MDP0000234798	ppa012507m	1.1582
MDP0000470928	ppa006752m	2.14766							ppa004537m	mrna21882	0.180782							mrna32022	ppa006484m	0.462789				mrna01680	MDP0000293847	0.618625	MDP0000234798	ppa012739m	1.38127
MDP0000470928	ppa025544m	0.496612							ppa004537m	ppa005279m	0.287876							mrna32024	MDP0000138052	0.477014				mrna01680	MDP0000297791	0.691665	MDP0000234798	ppa013020m	1.63143
MDP0000636541	MDP0000129112	0.658558							ppa007578m	MDP0000121258	0.228187							mrna32024	MDP0000185553	0.578869				mrna01680	MDP0000305387	0.700072	MDP0000234798	ppa013046m	1.50307
MDP0000636541	MDP0000169112	1.11729							ppa007578m	MDP0000262210	0.139003							mrna32024	MDP0000197219	0.399479				mrna01680	mrna28103	0.592578	MDP0000239026	MDP0000205823	1.69764
MDP0000636541	MDP0000208334	0.541023							ppa007578m	MDP0000274723	0.253297							mrna32024	MDP0000231274	0.363141				mrna01680	ppa006097m	0.988195	MDP0000239026	MDP0000905135	0.859699
MDP0000636541	MDP0000215106	0.57978							ppa007578m	MDP0000277999	0.0887793							mrna32024	MDP0000251332	0.351728				mrna01680	ppa007645m	0.690802	MDP0000239026	MDP0000917315	1.03817
MDP0000636541	MDP0000248567	1.42111							ppa007578m	MDP0000300532	0.303129							mrna32024	MDP0000286846	0.530278				mrna08484	MDP0000129203	0.821788	MDP0000239026	mrna18282	1.40579
MDP0000636541	MDP0000250947	0.578707							ppa007578m	MDP0000320524	0.170525							mrna32024	MDP0000493795	0.478763				mrna08484	MDP0000210251	0.82442	MDP0000239026	mrna26148	1.53239
MDP0000636541	MDP0000296303	1.25978							ppa007578m	mrna14220	0.175158							mrna32024	MDP0000545420	0.48481				mrna08484	MDP0000247372	0.47868	MDP0000239026	ppa012281m	0.922819
MDP0000636541	MDP0000701734	1.43176							ppa007578m	mrna31322	0.177688							mrna32024	mrna13716	0.534355				mrna08484	ppa007645m	0.682252	MDP0000249561	MDP0000205823	1.79856
MDP0000636541	MDP0000706379	0.539136							ppa007578m	ppa004537m	0.151074							mrna32024	mrna18928	2.02071				mrna21344	MDP0000120158	0.289727	MDP0000249561	MDP0000239026	1.68247
MDP0000636541	mrna00393	0.461766							ppa007578m	ppa007593m	0.145374							mrna32024	ppa006173m	0.623387				mrna21344	MDP0000293847	0.287265	MDP0000249561	MDP0000448715	1.20985
MDP0000636541	mrna08154	0.764185							ppa007593m	MDP0000277999	0.1981							mrna32024	ppa006484m	0.495286				mrna21344	MDP0000295681	0.376033	MDP0000249561	MDP0000521934	1.38919
MDP0000636541	mrna08566	0.4025							ppa007593m	MDP0000300532	0.23676							ppa006173m	MDP0000185553	0.758409				mrna21344	MDP0000297791	0.297136	MDP0000249561	MDP0000905135	1.00663
MDP0000636541	mrna09110	1.3252							ppa007593m	MDP0000536881	0.130671							ppa006173m	MDP0000231274	0.601889				mrna21344	MDP0000305387	0.293738	MDP0000249561	MDP0000917315	1.07746
MDP0000636541	mrna11837	0.317222							ppa007593m	mrna21797	0.245294							ppa006173m	MDP0000251332	0.56398				mrna21344	mrna28103	0.297955	MDP0000249561	mrna14942	1.85664
MDP0000636541	mrna28250	1.3889							ppa007593m	mrna21882	0.141908							ppa006173m	MDP0000286846	0.756713				mrna21344	ppa006097m	0.333663	MDP0000249561	mrna15193	1.54101
MDP0000636541	mrna31321	0.599712							ppa007593m	mrna31322	0.251551							ppa006173m	mrna13716	0.546514				mrna21344	ppa007645m	0.246575	MDP0000249561	mrna18282	1.45204
MDP0000636541	ppa006503m	1.7199							ppa007593m	ppa004537m	0.247317							ppa006173m	mrna18928	0.8678				mrna23487	MDP0000120158	0.432737	MDP0000249561	mrna21832	1.79022
MDP0000636541	ppa022266m	0.623098							ppa019842m	mrna03778	0.383466							ppa006173m	mrna29546	0.586694				mrna23487	MDP0000234166	0.198267	MDP0000249561	mrna26148	1.65978
MDP0000636541	ppa024363m	0.247897							ppa019842m	mrna14220	0.0880795							ppa006173m	ppa006484m	0.580168				mrna23487	MDP0000293847	0.443871	MDP0000249561	ppa012281m	1.21576
MDP0000636541	ppa025544m	0.337182							ppa019842m	mrna21882	0.143217							ppa006173m	ppa008024m	0.467256				mrna23487	MDP0000295681	0.417755	MDP0000249561	ppa012507m	1.3249
MDP0000701734	MDP0000248567	0.212416																ppa008024m	MDP0000185553	0.368104				mrna23487	MDP0000297791	0.42124	MDP0000249561	ppa012739m	1.35478
MDP0000701734	MDP0000296303	0.669921																ppa008024m	MDP0000231274	0.19365				mrna23487	MDP0000305387	0.415095	MDP0000249561	ppa013020m	1.69481
MDP0000701734	mrna09110	0.200341																ppa008024m	MDP0000286846	0.261502				mrna23487	mrna01680	1.29907	MDP0000261154	MDP0000140166	0.44643
MDP0000701734	mrna28250	0.255761																ppa008024m	mrna29546	0.226059				mrna23487	mrna28103	0.222678	MDP0000261154	MDP0000190277	0.385696
MDP0000701734	ppa006752m	0.169379																ppa008024m	ppa006484m	0.500919				mrna23487	ppa006097m	0.285701	MDP0000261154	MDP0000200822	0.391738
MDP0000706379	MDP0000129112	0.416821																ppa020524m	MDP0000138052	0.366243				mrna28103	MDP0000120158	0.385036	MDP0000261154	MDP0000205823	0.439394
MDP0000706379	MDP0000208334	0.330016																ppa020524m	MDP0000185553	0.247242				mrna28103	MDP0000293847	0.411032	MDP0000261154	MDP0000239026	0.445854
MDP0000706379	MDP0000250947	0.440827																ppa020524m	MDP0000197219	0.317499				mrna28103	MDP0000295681	0.443055	MDP0000261154	MDP0000249561	0.343567
MDP0000706379	MDP0000296303	1.0357																ppa020524m	MDP0000286846	0.391213				mrna32629	MDP0000129203	0.396001	MDP0000261154	MDP0000265875	0.372034
MDP0000706379	MDP0000701734	0.94466																ppa020524m	MDP0000493795	0.402007				mrna32629	MDP0000141948	0.522793	MDP0000261154	MDP0000448715	0.271141
MDP0000706379	mrna08154	0.328498																ppa020524m	MDP0000545420	0.404431				mrna32629	MDP0000210251	0.397638	MDP0000261154	MDP0000738631	0.426266
MDP0000706379	mrna09110	0.540365																ppa020524m	mrna18928	2.84428				mrna32629	MDP0000247372	0.366135	MDP0000261154	mrna02614	0.375282
MDP0000706379	mrna11837	0.309208																ppa020524m	mrna29546	0.422619				mrna32629	MDP0000282828	0.712524	MDP0000261154	mrna14942	0.429292
MDP0000706379	mrna31321	0.436978																ppa020524m	mrna32022	0.760494				mrna32629	MDP0000295681	0.202186	MDP0000261154	mrna21832	0.398272
MDP0000706379	ppa006503m	0.98189																ppa020524m	mrna32024	0.850314				mrna32629	MDP0000300820	0.667782	MDP0000261154	ppa011366m	0.332663
MDP0000706379	ppa024363m	0.409743																ppa020524m	ppa006173m	0.557293				mrna32629	MDP0000479652	0.942912	MDP0000261154	ppa012739m	0.268922
MDP0000740787	MDP0000248567	0.878091																ppa020524m	ppa006484m	0.311339				mrna32629	mrna21344	0.375057	MDP0000261154	ppa021433m	0.412689
MDP0000740787	mrna09110	0.558923																						mrna32629	mrna28103	0.378928	MDP0000265875	MDP0000205823	1.66981
MDP0000740787	ppa006752m	0.809541																						mrna32629	ppa003452m	1.11196	MDP0000265875	MDP0000239026	1.54825
mrna00393	MDP0000215106	0.223403																						mrna32629	ppa007645m	0.344739	MDP0000265875	MDP0000249561	0.973864
mrna00393	MDP0000248567	0.476707																						ppa003452m	MDP0000120158	0.390642	MDP0000265875	MDP0000448715	1.14038
mrna00393	MDP0000273211	0.161562																						ppa003452m	MDP0000129203	0.867316	MDP0000265875	MDP0000521934	1.36556
mrna00393	MDP0000701734	0.259636																						ppa003452m	MDP0000210251	0.881148	MDP0000265875	MDP0000905135	1.00452
mrna00393	MDP0000740787	0.627453																						ppa003452m	MDP0000247372	0.777603	MDP0000265875	MDP0000917315	1.07163
mrna00393	mrna31321	0.322481																						ppa003452m	MDP0000282828	0.264255	MDP0000265875	mrna14942	1.53555
mrna00393	ppa006503m	0.552548																						ppa003452m	MDP0000295681	0.370116	MDP0000265875	mrna15193	1.42952
mrna00393	ppa006752m	0.411473																						ppa003452m	MDP0000300820	0.164715	MDP0000265875	mrna18282	1.27833
mrna00393	ppa008716m	0.1231																						ppa003452m	MDP0000305387	0.293525	MDP0000265875	mrna21832	1.91928
mrna00393	ppa022266m	0.160977																						ppa003452m	MDP0000479652	0.21529	MDP0000265875	mrna26148	1.30909
mrna08154	MDP0000129112	0.276452																						ppa003452m	mrna01680	0.170166	MDP0000265875	ppa012281m	1.18647
mrna08154	MDP0000144105	0.510409																						ppa003452m	mrna08484	0.139276	MDP0000265875	ppa012507m	1.22634
mrna08154	MDP0000177486	0.514944																						ppa003452m	ppa006097m	0.490374	MDP0000265875	ppa012739m	1.49541
mrna08154	MDP0000208334	0.2464																						ppa003452m	ppa007645m	0.617869	MDP0000265875	ppa013020m	1.77476
mrna08154	MDP0000231542	0.539379																						ppa005999m	MDP0000120158	0.358811	MDP0000407755	MDP0000140166	1.02333
mrna08154	MDP0000296303	1.24665																						ppa005999m	MDP0000234166	0.165216	MDP0000407755	MDP0000190277	1.36758
mrna08154	MDP0000701734	1.15762																						ppa005999m	MDP0000293847	0.35898	MDP0000407755	MDP0000200822	1.30161
mrna08154	mrna09110	1.01444																						ppa005999m	MDP0000295681	0.399913	MDP0000407755	MDP0000205823	1.37927
mrna08154	mrna28250	0.503679																						ppa005999m	MDP0000297791	0.387021	MDP0000407755	MDP0000234798	1.50978
mrna08154	ppa006503m	1.12556																						ppa005999m	MDP0000305387	0.37854	MDP0000407755	MDP0000239026	1.2557
mrna08154	ppa019833m	0.542821																						ppa005999m	mrna01680	1.12848	MDP0000407755	MDP0000249561	1.57425
mrna08566	MDP0000129112	0.491568																						ppa005999m	mrna23487	0.181104	MDP0000407755	MDP0000265875	1.4339
mrna08566	MDP0000198495	0.614473																						ppa005999m	mrna28103	0.269494	MDP0000407755	MDP0000437680	1.62902
mrna08566	MDP0000208334	0.646835																						ppa005999m	ppa006097m	0.405129	MDP0000407755	MDP0000448715	1.54231
mrna08566	MDP0000250947	0.196273																						ppa006097m	MDP0000120158	0.327289	MDP0000407755	MDP0000521934	1.52102
mrna08566	MDP0000706379	0.584243																						ppa006097m	MDP0000293847	0.357712	MDP0000407755	MDP0000738631	1.31348
mrna08566	mrna11837	0.764845																						ppa006097m	MDP0000295681	0.420124	MDP0000407755	MDP0000905135	1.05957
mrna08566	ppa022266m	0.324349																						ppa006097m	mrna28103	0.331239	MDP0000407755	MDP0000917315	1.21048
mrna08566	ppa025544m	0.239128																						ppa007645m	MDP0000120158	0.297525	MDP0000407755	MDP0000949327	1.50978
mrna09110	MDP0000248567	0.183758																						ppa007645m	MDP0000293847	0.285533	MDP0000407755	mrna02284	1.36107
mrna09110	mrna28250	0.180151																						ppa007645m	MDP0000295681	0.31194	MDP0000407755	mrna02614	1.35039
mrna09110	ppa006752m	0.172476																						ppa007645m	MDP0000297791	0.289842	MDP0000407755	mrna14942	1.75281
mrna11837	MDP0000129112	0.493722																						ppa007645m	MDP0000305387	0.286572	MDP0000407755	mrna15193	1.25208
mrna11837	MDP0000144105	0.373424																						ppa007645m	mrna28103	0.284901	MDP0000407755	mrna18282	1.02736
mrna11837	MDP0000177486	0.378518																						ppa007645m	ppa006097m	0.331371	MDP0000407755	mrna21832	1.26551
mrna11837	MDP0000208334	0.378387																						ppa008658m	MDP0000129203	0.330947	MDP0000407755	mrna26148	0.890731
mrna11837	MDP0000231542	0.568418																						ppa008658m	MDP0000141948	0.37322	MDP0000407755	ppa011366m	1.2996
mrna11837	MDP0000250947	0.548411																						ppa008658m	MDP0000210251	0.32208	MDP0000407755	ppa011644m	3.16158
mrna11837	MDP0000296303	0.809227																						ppa008658m	MDP0000247372	0.270814	MDP0000407755	ppa012281m	0.890395
mrna11837	MDP0000701734	1.03195																						ppa008658m	MDP0000295681	0.154104	MDP0000407755	ppa012507m	1.25284
mrna11837	mrna08154	0.524042																						ppa008658m	mrna01680	0.771829	MDP0000407755	ppa012739m	1.42233
mrna11837	mrna30280	0.411356																						ppa008658m	mrna21344	0.370577	MDP0000407755	ppa013020m	1.45299
mrna11837	mrna31321	0.405623																						ppa008658m	mrna28103	0.289878	MDP0000407755	ppa013046m	1.37287
mrna11837	ppa006503m	0.8261																						ppa008658m	mrna32629	0.360698	MDP0000407755	ppa021433m	1.60766
mrna11837	ppa019833m	0.446022																						ppa008658m	ppa007645m	0.435511	MDP0000437680	MDP0000205823	1.30616
mrna11837	ppa024363m	0.372178																						ppb020445m	MDP0000120802	1.29065	MDP0000437680	MDP0000239026	1.09847
mrna14556	MDP0000144105	0.493653																						ppb020445m	MDP0000141948	0.340767	MDP0000437680	MDP0000249561	1.34481
mrna14556	MDP0000169112	1.29821																						ppb020445m	MDP0000234166	0.621608	MDP0000437680	MDP0000265875	1.30153
mrna14556	MDP0000177486	0.516956																						ppb020445m	MDP0000247372	0.240427	MDP0000437680	MDP0000448715	1.06587
mrna14556	MDP0000215106	0.440448																						ppb020445m	MDP0000435971	0.57343	MDP0000437680	MDP0000521934	1.0666
mrna14556	MDP0000250947	0.558208																						ppb020445m	MDP0000602946	0.393853	MDP0000437680	MDP0000905135	1.05841
mrna14556	MDP0000296303	1.11872																						ppb020445m	mrna01680	1.45751	MDP0000437680	MDP0000917315	1.14527
mrna14556	MDP0000470928	0.455544																						ppb020445m	mrna21344	0.251792	MDP0000437680	mrna02284	1.91236
mrna14556	MDP0000636541	0.479527																						ppb020445m	mrna23487	0.516034	MDP0000437680	mrna14942	1.05794
mrna14556	MDP0000701734	1.16064																						ppb020445m	ppa005999m	0.765976	MDP0000437680	mrna15193	1.04324
mrna14556	MDP0000706379	0.537176																						ppb020445m	ppa007645m	0.355788	MDP0000437680	mrna18282	1.47663
mrna14556	MDP0000740787	0.738609																									MDP0000437680	mrna21832	1.39184
mrna14556	mrna00393	0.32729																									MDP0000437680	mrna26148	1.36856
mrna14556	mrna08154	0.488703																									MDP0000437680	ppa012281m	0.927849
mrna14556	mrna08566	0.361412																									MDP0000437680	ppa012507m	1.17263
mrna14556	mrna09110	1.69445																									MDP0000437680	ppa012739m	1.26071
mrna14556	mrna28250	2.75332																									MDP0000437680	ppa013020m	1.62883
mrna14556	mrna30280	0.691764																									MDP0000437680	ppa013046m	1.89485
mrna14556	mrna31321	0.551807																									MDP0000448715	MDP0000205823	1.84755
mrna14556	ppa006503m	0.953748																									MDP0000448715	MDP0000239026	1.80061
mrna14556	ppa006752m	2.07811																									MDP0000448715	MDP0000905135	1.0723
mrna14556	ppa019833m	0.452314																									MDP0000448715	MDP0000917315	1.08008
mrna14556	ppa022266m	0.424758																									MDP0000448715	mrna15193	1.71403
mrna14556	ppa024363m	0.447371																									MDP0000448715	mrna18282	1.47227
mrna28250	MDP0000248567	0.245954																									MDP0000448715	mrna21832	1.94753
mrna28250	ppa006752m	0.178076																									MDP0000448715	mrna26148	1.73678
mrna30280	MDP0000248567	1.8211																									MDP0000448715	ppa012281m	1.04136
mrna30280	MDP0000296303	2.38899																									MDP0000448715	ppa012507m	1.67288
mrna30280	MDP0000701734	0.867395																									MDP0000448715	ppa012739m	2.05311
mrna30280	MDP0000740787	0.774041																									MDP0000521934	MDP0000205823	2.21852
mrna30280	mrna09110	1.40705																									MDP0000521934	MDP0000239026	2.04259
mrna30280	mrna28250	0.775768																									MDP0000521934	MDP0000448715	0.553494
mrna30280	ppa006503m	1.04799																									MDP0000521934	MDP0000905135	0.98348
mrna30280	ppa006752m	1.13939																									MDP0000521934	MDP0000917315	0.957981
mrna31321	MDP0000144105	0.685471																									MDP0000521934	mrna15193	2.61379
mrna31321	MDP0000177486	0.675912																									MDP0000521934	mrna18282	1.39333
mrna31321	MDP0000231542	0.695751																									MDP0000521934	mrna21832	2.79873
mrna31321	MDP0000248567	0.489877																									MDP0000521934	mrna26148	1.83918
mrna31321	MDP0000296303	0.717017																									MDP0000521934	ppa012281m	1.06992
mrna31321	MDP0000701734	0.781058																									MDP0000521934	ppa012507m	2.40696
mrna31321	MDP0000740787	0.556538																									MDP0000521934	ppa012739m	1.9517
mrna31321	mrna28250	0.740862																									MDP0000738631	MDP0000140166	1.19245
mrna31321	ppa006752m	0.624481																									MDP0000738631	MDP0000190277	1.49476
mrna31321	ppa024363m	0.257892																									MDP0000738631	MDP0000200822	1.34768
ppa006503m	MDP0000248567	0.154069																									MDP0000738631	MDP0000205823	1.17459
ppa006503m	MDP0000296303	0.100975																									MDP0000738631	MDP0000234798	1.78501
ppa006503m	MDP0000701734	0.115878																									MDP0000738631	MDP0000239026	1.22632
ppa006503m	mrna09110	0.149488																									MDP0000738631	MDP0000249561	1.61502
ppa006503m	mrna28250	0.209256																									MDP0000738631	MDP0000265875	1.39411
ppa006503m	ppa006752m	0.141617																									MDP0000738631	MDP0000437680	1.60231
ppa008716m	MDP0000215106	0.23513																									MDP0000738631	MDP0000448715	1.2575
ppa008716m	MDP0000273211	0.177577																									MDP0000738631	MDP0000521934	1.37137
ppa008716m	MDP0000740787	0.478449																									MDP0000738631	MDP0000905135	1.31029
ppa008716m	ppa006503m	0.293858																									MDP0000738631	MDP0000917315	1.34692
ppa008716m	ppa006752m	0.350355																									MDP0000738631	MDP0000949327	1.78501
ppa008716m	ppa022266m	0.183791																									MDP0000738631	mrna02284	1.9145
ppa018386m	MDP0000144105	0.453246																									MDP0000738631	mrna02614	1.77007
ppa018386m	MDP0000169112	0.741786																									MDP0000738631	mrna14942	1.46535
ppa018386m	MDP0000177486	0.488073																									MDP0000738631	mrna15193	1.19323
ppa018386m	MDP0000215106	0.629952																									MDP0000738631	mrna18282	1.26235
ppa018386m	MDP0000231542	0.366892																									MDP0000738631	mrna21832	1.23471
ppa018386m	MDP0000273211	0.592757																									MDP0000738631	mrna26148	2.03382
ppa018386m	MDP0000470928	0.333071																									MDP0000738631	ppa011366m	1.8963
ppa018386m	MDP0000636541	0.374519																									MDP0000738631	ppa012281m	1.29821
ppa018386m	mrna08566	0.369976																									MDP0000738631	ppa012507m	1.4126
ppa018386m	mrna14556	0.466615																									MDP0000738631	ppa012739m	1.15026
ppa018386m	mrna30280	0.624173																									MDP0000738631	ppa013020m	1.76741
ppa018386m	ppa008716m	0.50437																									MDP0000738631	ppa013046m	1.88691
ppa018386m	ppa022266m	0.298929																									MDP0000738631	ppa021433m	1.52341
ppa019833m	MDP0000296303	1.92124																									MDP0000863909	MDP0000140166	1.1107
ppa019833m	MDP0000740787	1.24526																									MDP0000863909	MDP0000190277	1.34686
ppa019833m	mrna09110	1.05679																									MDP0000863909	MDP0000200822	1.26591
ppa019833m	mrna28250	1.09862																									MDP0000863909	MDP0000205823	1.5246
ppa019833m	mrna30280	0.165314																									MDP0000863909	MDP0000234798	1.7205
ppa019833m	ppa006503m	0.864375																									MDP0000863909	MDP0000239026	1.45646
ppa022266m	MDP0000231542	0.483391																									MDP0000863909	MDP0000249561	1.33041
ppa022266m	MDP0000740787	2.04005																									MDP0000863909	MDP0000265875	1.23375
ppa022266m	ppa006503m	0.228317																									MDP0000863909	MDP0000407755	1.68824
ppa022266m	ppa024363m	0.145023																									MDP0000863909	MDP0000437680	1.81622
ppa024363m	MDP0000144105	0.496067																									MDP0000863909	MDP0000448715	1.56083
ppa024363m	MDP0000177486	0.483463																									MDP0000863909	MDP0000521934	1.46332
ppa024363m	MDP0000231542	0.359833																									MDP0000863909	MDP0000738631	1.22956
ppa024363m	MDP0000701734	0.345695																									MDP0000863909	MDP0000905135	1.1288
ppa024363m	mrna09110	0.328699																									MDP0000863909	MDP0000917315	1.2671
ppa024363m	mrna28250	0.25719																									MDP0000863909	MDP0000949327	1.7205
ppa024363m	mrna30280	0.582224																									MDP0000863909	mrna02284	1.69419
ppa025544m	MDP0000129112	0.439076																									MDP0000863909	mrna02614	1.44888
ppa025544m	MDP0000208334	0.26169																									MDP0000863909	mrna04187	2.18862
ppa025544m	MDP0000250947	0.373546																									MDP0000863909	mrna14942	1.75539
ppa025544m	MDP0000296303	1.16685																									MDP0000863909	mrna15193	1.44481
ppa025544m	MDP0000701734	1.15331																									MDP0000863909	mrna18282	1.10762
ppa025544m	MDP0000706379	0.249498																									MDP0000863909	mrna21832	1.37406
ppa025544m	MDP0000740787	1.20782																									MDP0000863909	mrna26148	0.796491
ppa025544m	mrna08154	0.425894																									MDP0000863909	ppa011366m	1.33524
ppa025544m	mrna09110	0.774864																									MDP0000863909	ppa011644m	8.00372
ppa025544m	mrna11837	0.45325																									MDP0000863909	ppa012281m	1.07629
ppa025544m	mrna31321	0.227544																									MDP0000863909	ppa012507m	1.19191
ppa025544m	ppa006503m	0.969946																									MDP0000863909	ppa012739m	1.48438
ppa025544m	ppa024363m	0.426576																									MDP0000863909	ppa013020m	1.34757
																											MDP0000863909	ppa013046m	1.77368
																											MDP0000863909	ppa021433m	1.69229
																											MDP0000891108	MDP0000140166	1.47604
																											MDP0000891108	MDP0000183562	2.26208
																											MDP0000891108	MDP0000190277	1.58487
																											MDP0000891108	MDP0000200822	1.61974
																											MDP0000891108	MDP0000205823	1.51487
																											MDP0000891108	MDP0000234798	1.16142
																											MDP0000891108	MDP0000239026	1.43956
																											MDP0000891108	MDP0000249561	1.27896
																											MDP0000891108	MDP0000265875	1.38114
																											MDP0000891108	MDP0000407755	1.77625
																											MDP0000891108	MDP0000437680	1.13964
																											MDP0000891108	MDP0000448715	1.52012
																											MDP0000891108	MDP0000521934	1.42329
																											MDP0000891108	MDP0000738631	1.19912
																											MDP0000891108	MDP0000863909	1.9113
																											MDP0000891108	MDP0000891899	0.932245
																											MDP0000891108	MDP0000905135	0.727094
																											MDP0000891108	MDP0000917315	0.802412
																											MDP0000891108	MDP0000949327	1.16142
																											MDP0000891108	mrna02284	0.836188
																											MDP0000891108	mrna02614	1.73664
																											MDP0000891108	mrna04187	1.8264
																											MDP0000891108	mrna04504	1.65394
																											MDP0000891108	mrna14942	0.927849
																											MDP0000891108	mrna15193	1.21148
																											MDP0000891108	mrna18282	0.921209
																											MDP0000891108	mrna21832	1.32784
																											MDP0000891108	mrna26148	1.06927
																											MDP0000891108	ppa011366m	1.12472
																											MDP0000891108	ppa011589m	2.8105
																											MDP0000891108	ppa011644m	1.80945
																											MDP0000891108	ppa012281m	0.701395
																											MDP0000891108	ppa012507m	1.09631
																											MDP0000891108	ppa012739m	1.51473
																											MDP0000891108	ppa013020m	1.37208
																											MDP0000891108	ppa013046m	1.19825
																											MDP0000891108	ppa021433m	2.04011
																											MDP0000891899	MDP0000140166	1.55165
																											MDP0000891899	MDP0000190277	1.60154
																											MDP0000891899	MDP0000200822	1.61632
																											MDP0000891899	MDP0000205823	1.70564
																											MDP0000891899	MDP0000234798	1.24632
																											MDP0000891899	MDP0000239026	1.61323
																											MDP0000891899	MDP0000249561	1.37477
																											MDP0000891899	MDP0000265875	1.42089
																											MDP0000891899	MDP0000407755	2.10007
																											MDP0000891899	MDP0000437680	1.21913
																											MDP0000891899	MDP0000448715	1.65997
																											MDP0000891899	MDP0000521934	1.51306
																											MDP0000891899	MDP0000738631	1.19078
																											MDP0000891899	MDP0000863909	2.04128
																											MDP0000891899	MDP0000905135	0.990073
																											MDP0000891899	MDP0000917315	1.02173
																											MDP0000891899	MDP0000949327	1.24632
																											MDP0000891899	mrna02284	0.932829
																											MDP0000891899	mrna02614	1.48624
																											MDP0000891899	mrna04187	1.88591
																											MDP0000891899	mrna04504	1.7068
																											MDP0000891899	mrna14942	1.17973
																											MDP0000891899	mrna15193	1.29894
																											MDP0000891899	mrna18282	0.974103
																											MDP0000891899	mrna21832	1.53539
																											MDP0000891899	mrna26148	1.06543
																											MDP0000891899	ppa011366m	1.24851
																											MDP0000891899	ppa011589m	2.49372
																											MDP0000891899	ppa011644m	2.11848
																											MDP0000891899	ppa012281m	0.84639
																											MDP0000891899	ppa012507m	1.26129
																											MDP0000891899	ppa012739m	1.68239
																											MDP0000891899	ppa013020m	1.48043
																											MDP0000891899	ppa013046m	1.23728
																											MDP0000891899	ppa021433m	1.72305
																											MDP0000917315	MDP0000905135	2.22237
																											MDP0000949327	MDP0000205823	1.34357
																											MDP0000949327	MDP0000239026	1.24069
																											MDP0000949327	MDP0000249561	1.46497
																											MDP0000949327	MDP0000265875	1.39312
																											MDP0000949327	MDP0000437680	1.87543
																											MDP0000949327	MDP0000448715	1.08188
																											MDP0000949327	MDP0000521934	1.06098
																											MDP0000949327	MDP0000905135	1.04162
																											MDP0000949327	MDP0000917315	1.06418
																											MDP0000949327	mrna02284	1.88503
																											MDP0000949327	mrna14942	1.11777
																											MDP0000949327	mrna15193	1.07802
																											MDP0000949327	mrna18282	1.52675
																											MDP0000949327	mrna21832	1.44192
																											MDP0000949327	mrna26148	1.51283
																											MDP0000949327	ppa012281m	0.941042
																											MDP0000949327	ppa012507m	1.1582
																											MDP0000949327	ppa012739m	1.38127
																											MDP0000949327	ppa013020m	1.63143
																											MDP0000949327	ppa013046m	1.50307
																											mrna02284	MDP0000205823	1.12641
																											mrna02284	MDP0000239026	1.06673
																											mrna02284	MDP0000249561	1.48166
																											mrna02284	MDP0000265875	1.25078
																											mrna02284	MDP0000448715	1.10706
																											mrna02284	MDP0000521934	1.29559
																											mrna02284	MDP0000905135	1.17088
																											mrna02284	MDP0000917315	1.27334
																											mrna02284	mrna14942	0.993359
																											mrna02284	mrna15193	1.02533
																											mrna02284	mrna18282	1.27727
																											mrna02284	mrna21832	1.09849
																											mrna02284	mrna26148	1.53365
																											mrna02284	ppa012281m	0.965424
																											mrna02284	ppa012507m	1.32137
																											mrna02284	ppa012739m	0.966257
																											mrna02284	ppa013020m	1.37454
																											mrna02614	MDP0000140166	1.88083
																											mrna02614	MDP0000190277	2.55391
																											mrna02614	MDP0000200822	2.03811
																											mrna02614	MDP0000205823	1.26727
																											mrna02614	MDP0000234798	1.20199
																											mrna02614	MDP0000239026	1.21826
																											mrna02614	MDP0000249561	1.74791
																											mrna02614	MDP0000265875	1.51818
																											mrna02614	MDP0000437680	0.923167
																											mrna02614	MDP0000448715	1.54969
																											mrna02614	MDP0000521934	1.37694
																											mrna02614	MDP0000905135	1.34456
																											mrna02614	MDP0000917315	1.36707
																											mrna02614	MDP0000949327	1.20199
																											mrna02614	mrna02284	1.0589
																											mrna02614	mrna14942	1.42131
																											mrna02614	mrna15193	1.44892
																											mrna02614	mrna18282	1.55505
																											mrna02614	mrna21832	0.926793
																											mrna02614	mrna26148	2.0308
																											mrna02614	ppa012281m	1.33953
																											mrna02614	ppa012507m	1.22383
																											mrna02614	ppa012739m	0.930439
																											mrna02614	ppa013020m	1.79112
																											mrna02614	ppa013046m	1.11543
																											mrna04187	MDP0000140166	1.05609
																											mrna04187	MDP0000190277	1.45905
																											mrna04187	MDP0000200822	1.2268
																											mrna04187	MDP0000205823	1.33015
																											mrna04187	MDP0000234798	1.22524
																											mrna04187	MDP0000239026	1.259
																											mrna04187	MDP0000249561	1.30772
																											mrna04187	MDP0000265875	1.32256
																											mrna04187	MDP0000407755	1.6928
																											mrna04187	MDP0000437680	1.26275
																											mrna04187	MDP0000448715	1.60262
																											mrna04187	MDP0000521934	1.48499
																											mrna04187	MDP0000738631	1.21167
																											mrna04187	MDP0000905135	1.2404
																											mrna04187	MDP0000917315	1.26232
																											mrna04187	MDP0000949327	1.22524
																											mrna04187	mrna02284	1.15205
																											mrna04187	mrna02614	1.40194
																											mrna04187	mrna14942	1.46996
																											mrna04187	mrna15193	1.37107
																											mrna04187	mrna18282	1.08515
																											mrna04187	mrna21832	1.23575
																											mrna04187	mrna26148	0.959063
																											mrna04187	ppa011366m	1.40448
																											mrna04187	ppa011644m	2.30084
																											mrna04187	ppa012281m	1.07986
																											mrna04187	ppa012507m	1.24264
																											mrna04187	ppa012739m	1.37803
																											mrna04187	ppa013020m	1.19489
																											mrna04187	ppa013046m	1.38074
																											mrna04187	ppa021433m	1.9261
																											mrna04504	MDP0000140166	1.49913
																											mrna04504	MDP0000190277	1.68145
																											mrna04504	MDP0000200822	1.48271
																											mrna04504	MDP0000205823	1.31293
																											mrna04504	MDP0000234798	1.01454
																											mrna04504	MDP0000239026	1.21273
																											mrna04504	MDP0000249561	1.33364
																											mrna04504	MDP0000265875	1.34055
																											mrna04504	MDP0000407755	1.69265
																											mrna04504	MDP0000437680	1.07951
																											mrna04504	MDP0000448715	1.08165
																											mrna04504	MDP0000521934	1.06408
																											mrna04504	MDP0000738631	0.942421
																											mrna04504	MDP0000863909	1.72567
																											mrna04504	MDP0000905135	1.02148
																											mrna04504	MDP0000917315	1.0384
																											mrna04504	MDP0000949327	1.01454
																											mrna04504	mrna02284	0.956889
																											mrna04504	mrna02614	1.60781
																											mrna04504	mrna04187	1.41533
																											mrna04504	mrna14942	1.38123
																											mrna04504	mrna15193	1.11232
																											mrna04504	mrna18282	1.05785
																											mrna04504	mrna21832	1.06732
																											mrna04504	mrna26148	0.849828
																											mrna04504	ppa011366m	1.11507
																											mrna04504	ppa011644m	1.59824
																											mrna04504	ppa012281m	1.07227
																											mrna04504	ppa012507m	0.853066
																											mrna04504	ppa012739m	1.24908
																											mrna04504	ppa013020m	1.51583
																											mrna04504	ppa013046m	1.09023
																											mrna04504	ppa021433m	1.86282
																											mrna14942	MDP0000205823	1.29069
																											mrna14942	MDP0000239026	1.03405
																											mrna14942	MDP0000448715	1.10182
																											mrna14942	MDP0000521934	1.51002
																											mrna14942	MDP0000905135	0.920701
																											mrna14942	MDP0000917315	0.876038
																											mrna14942	mrna15193	1.58382
																											mrna14942	mrna18282	1.0711
																											mrna14942	mrna21832	1.66369
																											mrna14942	mrna26148	1.29765
																											mrna14942	ppa012281m	0.992699
																											mrna14942	ppa012507m	1.42934
																											mrna14942	ppa012739m	1.18802
																											mrna15193	MDP0000205823	1.32428
																											mrna15193	MDP0000239026	1.19954
																											mrna15193	MDP0000905135	0.969261
																											mrna15193	MDP0000917315	0.888176
																											mrna15193	mrna18282	1.28107
																											mrna15193	mrna21832	1.46324
																											mrna15193	mrna26148	1.48502
																											mrna15193	ppa012281m	1.25036
																											mrna15193	ppa012739m	1.12247
																											mrna18282	MDP0000905135	1.3345
																											mrna18282	MDP0000917315	1.88175
																											mrna18282	ppa012281m	1.74956
																											mrna21832	MDP0000205823	2.1546
																											mrna21832	MDP0000239026	2.23953
																											mrna21832	MDP0000905135	0.842892
																											mrna21832	MDP0000917315	0.80145
																											mrna21832	mrna18282	1.12515
																											mrna21832	mrna26148	1.27903
																											mrna21832	ppa012281m	0.870521
																											mrna21832	ppa012739m	1.66346
																											mrna26148	MDP0000905135	1.08109
																											mrna26148	MDP0000917315	1.11435
																											mrna26148	mrna18282	1.09873
																											mrna26148	ppa012281m	1.14606
																											ppa011366m	MDP0000140166	1.0897
																											ppa011366m	MDP0000190277	1.46373
																											ppa011366m	MDP0000200822	1.27444
																											ppa011366m	MDP0000205823	1.22792
																											ppa011366m	MDP0000234798	1.40845
																											ppa011366m	MDP0000239026	1.22386
																											ppa011366m	MDP0000249561	1.38818
																											ppa011366m	MDP0000265875	1.23403
																											ppa011366m	MDP0000437680	1.25594
																											ppa011366m	MDP0000448715	1.32653
																											ppa011366m	MDP0000521934	1.38878
																											ppa011366m	MDP0000905135	1.46874
																											ppa011366m	MDP0000917315	1.29732
																											ppa011366m	MDP0000949327	1.40845
																											ppa011366m	mrna02284	1.50076
																											ppa011366m	mrna02614	1.59778
																											ppa011366m	mrna14942	1.11022
																											ppa011366m	mrna15193	1.40454
																											ppa011366m	mrna18282	1.4445
																											ppa011366m	mrna21832	1.19275
																											ppa011366m	mrna26148	2.01244
																											ppa011366m	ppa012281m	1.42303
																											ppa011366m	ppa012507m	1.3508
																											ppa011366m	ppa012739m	1.07182
																											ppa011366m	ppa013020m	1.4692
																											ppa011366m	ppa013046m	1.41345
																											ppa011366m	ppa021433m	1.4082
																											ppa011589m	MDP0000140166	1.30658
																											ppa011589m	MDP0000190277	1.32242
																											ppa011589m	MDP0000200822	1.38533
																											ppa011589m	MDP0000205823	1.31614
																											ppa011589m	MDP0000234798	0.906233
																											ppa011589m	MDP0000239026	1.18372
																											ppa011589m	MDP0000249561	1.22712
																											ppa011589m	MDP0000265875	1.3676
																											ppa011589m	MDP0000407755	1.53326
																											ppa011589m	MDP0000437680	0.88202
																											ppa011589m	MDP0000448715	1.32044
																											ppa011589m	MDP0000521934	1.23994
																											ppa011589m	MDP0000738631	1.27829
																											ppa011589m	MDP0000863909	1.61999
																											ppa011589m	MDP0000905135	0.871983
																											ppa011589m	MDP0000917315	1.05735
																											ppa011589m	MDP0000949327	0.906233
																											ppa011589m	mrna02284	0.857759
																											ppa011589m	mrna02614	1.18669
																											ppa011589m	mrna04187	1.46921
																											ppa011589m	mrna04504	1.5739
																											ppa011589m	mrna14942	1.08425
																											ppa011589m	mrna15193	1.20437
																											ppa011589m	mrna18282	0.897225
																											ppa011589m	mrna21832	1.30882
																											ppa011589m	mrna26148	1.28256
																											ppa011589m	ppa011366m	1.22594
																											ppa011589m	ppa011644m	1.75793
																											ppa011589m	ppa012281m	0.79252
																											ppa011589m	ppa012507m	1.006
																											ppa011589m	ppa012739m	1.34322
																											ppa011589m	ppa013020m	1.31959
																											ppa011589m	ppa013046m	1.0414
																											ppa011589m	ppa021433m	1.52362
																											ppa011644m	MDP0000140166	0.987198
																											ppa011644m	MDP0000190277	1.42839
																											ppa011644m	MDP0000200822	1.29674
																											ppa011644m	MDP0000205823	1.50642
																											ppa011644m	MDP0000234798	1.44561
																											ppa011644m	MDP0000239026	1.39744
																											ppa011644m	MDP0000249561	1.31452
																											ppa011644m	MDP0000261154	0.272991
																											ppa011644m	MDP0000265875	1.32729
																											ppa011644m	MDP0000437680	1.532
																											ppa011644m	MDP0000448715	1.58273
																											ppa011644m	MDP0000521934	1.48936
																											ppa011644m	MDP0000738631	1.45694
																											ppa011644m	MDP0000905135	1.01399
																											ppa011644m	MDP0000917315	1.11829
																											ppa011644m	MDP0000949327	1.44561
																											ppa011644m	mrna02284	1.48694
																											ppa011644m	mrna02614	1.3235
																											ppa011644m	mrna14942	1.50937
																											ppa011644m	mrna15193	1.51313
																											ppa011644m	mrna18282	1.00378
																											ppa011644m	mrna21832	1.40545
																											ppa011644m	mrna26148	0.6925
																											ppa011644m	ppa011366m	1.56498
																											ppa011644m	ppa012281m	0.964655
																											ppa011644m	ppa012507m	1.23358
																											ppa011644m	ppa012739m	1.46328
																											ppa011644m	ppa013020m	1.3073
																											ppa011644m	ppa013046m	1.35639
																											ppa011644m	ppa021433m	1.65974
																											ppa012281m	MDP0000905135	1.54689
																											ppa012281m	MDP0000917315	2.26512
																											ppa012507m	MDP0000205823	1.57095
																											ppa012507m	MDP0000239026	1.38623
																											ppa012507m	MDP0000905135	0.905649
																											ppa012507m	MDP0000917315	0.941643
																											ppa012507m	mrna15193	2.2599
																											ppa012507m	mrna18282	1.42486
																											ppa012507m	mrna21832	1.92715
																											ppa012507m	mrna26148	1.51572
																											ppa012507m	ppa012281m	0.976136
																											ppa012507m	ppa012739m	1.40704
																											ppa012739m	MDP0000205823	1.67646
																											ppa012739m	MDP0000239026	1.78279
																											ppa012739m	MDP0000905135	0.619755
																											ppa012739m	MDP0000917315	0.748085
																											ppa012739m	mrna18282	1.04002
																											ppa012739m	mrna26148	1.33848
																											ppa012739m	ppa012281m	0.739193
																											ppa013020m	MDP0000205823	1.72292
																											ppa013020m	MDP0000239026	1.24109
																											ppa013020m	MDP0000448715	0.998565
																											ppa013020m	MDP0000521934	1.32447
																											ppa013020m	MDP0000905135	1.07346
																											ppa013020m	MDP0000917315	1.15995
																											ppa013020m	mrna14942	1.83026
																											ppa013020m	mrna15193	1.46246
																											ppa013020m	mrna18282	1.43712
																											ppa013020m	mrna21832	1.16338
																											ppa013020m	mrna26148	1.71787
																											ppa013020m	ppa012281m	1.32107
																											ppa013020m	ppa012507m	1.37604
																											ppa013020m	ppa012739m	1.28718
																											ppa013046m	MDP0000205823	1.36494
																											ppa013046m	MDP0000239026	1.149
																											ppa013046m	MDP0000249561	1.81483
																											ppa013046m	MDP0000265875	1.82512
																											ppa013046m	MDP0000448715	1.40263
																											ppa013046m	MDP0000521934	1.35865
																											ppa013046m	MDP0000905135	1.07506
																											ppa013046m	MDP0000917315	1.18678
																											ppa013046m	mrna02284	1.46853
																											ppa013046m	mrna14942	1.51587
																											ppa013046m	mrna15193	1.27638
																											ppa013046m	mrna18282	1.64188
																											ppa013046m	mrna21832	1.65703
																											ppa013046m	mrna26148	1.47104
																											ppa013046m	ppa012281m	1.00182
																											ppa013046m	ppa012507m	1.44645
																											ppa013046m	ppa012739m	1.36458
																											ppa013046m	ppa013020m	1.85437
																											ppa021433m	MDP0000140166	1.70854
																											ppa021433m	MDP0000190277	2.1467
																											ppa021433m	MDP0000200822	1.59751
																											ppa021433m	MDP0000205823	1.94473
																											ppa021433m	MDP0000234798	1.82932
																											ppa021433m	MDP0000239026	1.77297
																											ppa021433m	MDP0000249561	2.30766
																											ppa021433m	MDP0000265875	2.11676
																											ppa021433m	MDP0000437680	1.43623
																											ppa021433m	MDP0000448715	2.14517
																											ppa021433m	MDP0000521934	2.07234
																											ppa021433m	MDP0000905135	1.45599
																											ppa021433m	MDP0000917315	1.49394
																											ppa021433m	MDP0000949327	1.82932
																											ppa021433m	mrna02284	1.59295
																											ppa021433m	mrna02614	2.34618
																											ppa021433m	mrna14942	2.11277
																											ppa021433m	mrna15193	2.19785
																											ppa021433m	mrna18282	1.74098
																											ppa021433m	mrna21832	1.64708
																											ppa021433m	mrna26148	1.86524
																											ppa021433m	ppa012281m	1.31115
																											ppa021433m	ppa012507m	1.75215
																											ppa021433m	ppa012739m	1.8044
																											ppa021433m	ppa013020m	2.32764
																											ppa021433m	ppa013046m	1.65145
