# Supplementary material for: Divergence of the bZIP Gene Family in Strawberry, Peach, and Apple Suggests Multiple Modes of Gene Evolution after Duplication
Source: Int J Genomics. 2015 Dec 7;2015:536943. doi: 10.1155/2015/536943 (PMC4685131; doi:10.1155/2015/536943)
Supplement: Supplementary file 1 — Figure S1. Phylogenetic tree constructed by the neighbor-joining method using protein sequences of the bZIP-domains in strawberry, apple, peach, and A. thaliana. Only bootstrap values larger than 50% are indicated. Different colors can be used to distinguish the different subgroups. The names of each subgroup are listed on the right. Table S1. bZIP genes in C. sativus, M. truncatula, P. trichocarpa, B. rapa, C. papaya, T. cacao, S. lycopersicum, M. acuminata, S. moellendorffii, P. patens, C. reinhardtii, C. merolae, and S. cerevisiae. Table S2. bZIP genes in strawberry, apple and peach. Gene name, chromosomal location, sequence and location of bZIP-domain, sequence of the full-length protein. Table S3. Ka/Ks ratio of bZIP genes in clade A-S. Table S4. Ka/Ks ratio of bZIP orthologs and paralogs in clades A-S. Table S5. Ka/Ks ratios of bZIP domains, BR and LZ domains in clades A-S. Table S6. Orthologous gene pairs of bZIP genes in strawberry, apple and peach. Gene name, clade, location, ORF length, and number of exons (Fv–strawberry; Md–apple; Pp–peach). Table S7. Orthologous chromosomes in strawberry, apple and peach (FC–strawberry chromosome; MC–apple chromosome; PC–peach chromosome). [file 536943.f1.zip › 536943.f1/Supplementary/Table S4 .xlsx]

## Sheet: Sheet3
Table S4 The Ka/Ks of bZIP orthologs and paralogs in clades A-S.
Clade A			Clade B			Clade C			Clade D			Clade E			Clade F			Clade G			Clade H			Clade I			Clade S
Gene 1	Gene 2	Ka/Ks	Gene 1	Gene 2	Ka/Ks	Gene 1	Gene 2	Ka/Ks	Gene 1	Gene 2	Ka/Ks	Gene 1	Gene 2	Ka/Ks	Gene 1	Gene 2	Ka/Ks	Gene 1	Gene 2	Ka/Ks	Gene 1	Gene 2	Ka/Ks	Gene 1	Gene 2	Ka/Ks	Gene 1	Gene 2	Ka/Ks
mrna09110	mrna28250	0.180151	MDP0000180785	MDP0000299504	0.340759	mrna08186	mrna16561	0.29901	MDP0000145555	MDP0000250967	0.29118	MDP0000178326	MDP0000555457	0.171861	MDP0000159670	MDP0000319187	0.57988	mrna18928	mrna32022	2.04066	mrna22776	MDP0000219041	0.196889	mrna21344	mrna28103	0.297955	mrna04187	mrna26148	0.959063
mrna08566	mrna14556	0.361412	MDP0000138811	MDP0000180785	0.340759	MDP0000176747	MDP0000275309	0.262472	mrna31621	MDP0000121258	0.235814	mrna27194	MDP0000133698	0.257226	MDP0000190186	MDP0000772633	0.538669	MDP0000185553	MDP0000286846	0.404276	mrna22776	MDP0000834642	0.19745	MDP0000280559	MDP0000300820	0.216114	mrna14942	mrna15193	1.58382
MDP0000129112	MDP0000208334	0.381854	MDP0000180785	ppa002181m	0.375518	mrna08186	MDP0000176747	0.315474	mrna31322	MDP0000277999	0.230894	mrna17796	MDP0000555457	0.158453	MDP0000772633	MDP0000898701	0.538669	MDP0000138052	MDP0000197219	0.324417	mrna11666	ppa012064m	0.0721029	MDP0000295681	MDP0000297791	0.348816	MDP0000234798	MDP0000437680	1.87543
MDP0000169473	MDP0000470928	0.471318	MDP0000378041	ppa002181m	0.24677	mrna08186	MDP0000275309	0.298793	mrna03778	MDP0000145555	0.414658	mrna17796	MDP0000178326	0.146534	mrna07554	MDP0000159670	0.291626	ppa006173m	ppa020524m	0.422619	mrna22776	ppa011967m	0.260352	MDP0000293847	MDP0000295681	0.85372	MDP0000905135	MDP0000917315	2.22237
MDP0000296303	MDP0000701734	0.669921				mrna08757	MDP0000680042	0.310738	mrna03778	MDP0000250967	0.382244	mrna17796	ppa022385m	0.192015	mrna07554	MDP0000319187	0.264031	mrna29546	MDP0000251332	0.262789	MDP0000219041	ppa011967m	0.279745	MDP0000120158	MDP0000293847	0.728483	MDP0000190277	MDP0000200822	0.721868
MDP0000198495	MDP0000706379	0.358217				mrna08757	ppa007814m	0.290699	mrna14220	MDP0000320524	0.0774482	mrna17796	ppa016271m	0.141517	mrna11979	MDP0000898701	0.513108	mrna32022	MDP0000386314	0.699882	MDP0000834642	ppa011967m	0.251399	MDP0000300820	MDP0000479652	0.273426	MDP0000249561	MDP0000265875	0.973864
MDP0000215106	MDP0000273211	0.588561				mrna16561	ppa005585m	0.401119	mrna31621	ppa007578m	0.232211	MDP0000133698	ppa016271m	0.147002	mrna11979	MDP0000772633	0.524127	mrna32024	MDP0000197219	0.363637	MDP0000586302	ppa012064m	0.179794	ppa006097m	ppa007645m	0.331371	MDP0000140166	MDP0000190277	0.814777
mrna00393	MDP0000273211	0.161562				MDP0000270365	ppa005585m	0.238965	mrna31322	ppa007593m	0.251551	MDP0000555457	ppa016271m	0.142191	mrna11979	ppa019868m	0.426205	mrna32024	MDP0000493795	0.478763				mrna01680	MDP0000120802	0.353943	MDP0000407755	MDP0000863909	1.68824
mrna00393	MDP0000215106	0.223403				MDP0000680042	ppa007814m	0.255121	mrna21797	ppa004537m	0.0926158	MDP0000178326	ppa016271m	0.165102	mrna07554	ppa009913m	0.201222	mrna18928	MDP0000197219	1.20191				mrna21344	MDP0000210251	0.257091	ppa011366m	ppa021433m	1.4082
mrna30280	MDP0000177486	0.194613							mrna14220	ppa005279m	0.0370389	MDP0000133698	ppa022385m	0.128907	MDP0000159670	ppa009913m	0.308786	mrna18928	MDP0000138052	0.805825				mrna32629	MDP0000602946	0.365574	ppa011589m	ppa011644m	1.75793
mrna30280	MDP0000231542	0.183089							MDP0000320322	ppa003825m	0.225606	MDP0000555457	ppa022385m	0.138727	MDP0000319187	ppa009913m	0.321362	mrna32022	ppa006173m	0.631066				mrna28103	MDP0000120158	0.385036	ppa011589m	ppa012281m	0.79252
mrna31321	MDP0000250947	0.389561							MDP0000536881	ppa005279m	0.104304	MDP0000134936	ppa022385m	0.13462	MDP0000898701	ppa019868m	0.555483	mrna18928	ppa006173m	0.366243				mrna08484	MDP0000280559	0.175086	ppa011644m	ppa011589m	1.75793
mrna28250	MDP0000248567	0.245954							MDP0000121258	ppa007578m	0.228187							mrna13716	ppa006484m	0.124728				mrna08484	MDP0000300820	0.147986	ppa011644m	ppa012281m	0.964655
mrna08154	MDP0000208334	0.2464							MDP0000277999	ppa007593m	0.1981							mrna32022	ppa020524m	0.404431				mrna08484	ppa003452m	0.139276	ppa012281m	ppa011589m	0.79252
mrna08154	MDP0000129112	0.276452							MDP0000145555	ppa019842m	0.166428							mrna18928	ppa020524m	0.247242				mrna21344	ppa007645m	0.246575	ppa012281m	ppa011644m	0.964655
mrna08566	MDP0000636541	0.4025																MDP0000197219	ppa006173m	0.321007				mrna28103	ppa007645m	0.284901	ppa012507m	ppa013020m	1.37604
mrna09110	MDP0000296303	0.198842																MDP0000138052	ppa006173m	0.316639				mrna21344	ppa006097m	0.333663	ppa012507m	ppa012739m	1.40704
mrna09110	MDP0000701734	0.200341																MDP0000251332	ppa008024m	0.204616				mrna28103	ppa006097m	0.331239	ppa012739m	ppa012507m	1.40704
mrna11837	MDP0000198495	0.421358																MDP0000197219	ppa020524m	0.546514				mrna32629	ppa008658m	0.360698	ppa012739m	ppa013020m	1.28718
mrna11837	MDP0000706379	0.309208																						MDP0000280559	ppa003452m	0.207931	ppa013020m	ppa012507m	1.37604
mrna14556	MDP0000169473	0.295012																						MDP0000300820	ppa003452m	0.164715	ppa013020m	ppa012739m	1.28718
mrna00393	ppa008716m	0.1231																						MDP0000297791	ppa006097m	0.341342	ppa021433m	ppa011366m	1.4082
mrna28250	ppa006503m	0.209256																						MDP0000295681	ppa006097m	0.420124	mrna02284	MDP0000437680	1.91236
mrna09110	ppa006503m	0.149488																						MDP0000247372	ppa006097m	0.31689	mrna02614	MDP0000190277	2.55391
mrna28250	ppa006752m	0.178076																						MDP0000297791	ppa007645m	0.289842	mrna02614	MDP0000140166	1.88083
mrna09110	ppa006752m	0.172476																						MDP0000210251	ppa007645m	0.207679	mrna21832	MDP0000205823	2.1546
mrna30280	ppa019833m	0.165314																						MDP0000602946	ppa008658m	0.329151	mrna04187	MDP0000891899	1.88591
mrna11837	ppa025544m	0.45325																									mrna04187	MDP0000863909	2.18862
mrna31321	ppa024363m	0.257892																									mrna04187	MDP0000407755	1.6928
mrna08566	ppa018386m	0.369976																									mrna14942	MDP0000249561	1.85664
mrna14556	ppa018386m	0.466615																									mrna15193	MDP0000448715	1.71403
MDP0000273211	ppa008716m	0.177577																									mrna15193	MDP0000521934	2.61379
MDP0000215106	ppa008716m	0.23513																									mrna04187	ppa011644m	2.30084
MDP0000169473	ppa018386m	0.374128																									mrna26148	ppa012281m	1.14606
MDP0000470928	ppa018386m	0.333071																									mrna04187	ppa011589m	1.46921
MDP0000177486	ppa019833m	0.159926																									mrna04504	ppa011589m	1.5739
MDP0000250947	ppa024363m	0.269252																									mrna14942	ppa013020m	1.83026
MDP0000198495	ppa025544m	0.314225																									mrna15193	ppa013020m	1.46246
MDP0000706379	ppa025544m	0.249498																									mrna14942	ppa012507m	1.42934
																											mrna15193	ppa012507m	2.2599
																											mrna21832	ppa012739m	1.66346
																											mrna14942	ppa012739m	1.18802
																											mrna15193	ppa012739m	1.12247
																											mrna02614	ppa021433m	2.34618
																											mrna02284	ppa013046m	1.46853
																											mrna02614	ppa011366m	1.59778
																											MDP0000738631	ppa011366m	1.8963
																											MDP0000891899	ppa011589m	2.49372
																											MDP0000183562	ppa011589m	1.79298
																											MDP0000863909	ppa011589m	1.61999
																											MDP0000407755	ppa011589m	1.53326
																											MDP0000891899	ppa011644m	2.11848
																											MDP0000863909	ppa011644m	8.00372
																											MDP0000407755	ppa011644m	3.16158
																											MDP0000905135	ppa012281m	1.54689
																											MDP0000917315	ppa012281m	2.26512
																											MDP0000249561	ppa012507m	1.3249
																											MDP0000521934	ppa012507m	2.40696
																											MDP0000239026	ppa012739m	1.78279
																											MDP0000448715	ppa012739m	2.05311
																											MDP0000521934	ppa012739m	1.9517
																											MDP0000205823	ppa012739m	1.67646
																											MDP0000249561	ppa013020m	1.69481
																											MDP0000234798	ppa013046m	1.50307
																											MDP0000437680	ppa013046m	1.89485
																											MDP0000190277	ppa021433m	2.1467
																											MDP0000140166	ppa021433m	1.70854
