# Supplementary material for: Divergence of the bZIP Gene Family in Strawberry, Peach, and Apple Suggests Multiple Modes of Gene Evolution after Duplication
Source: Int J Genomics. 2015 Dec 7;2015:536943. doi: 10.1155/2015/536943 (PMC4685131; doi:10.1155/2015/536943)
Supplement: Supplementary file 1 — Figure S1. Phylogenetic tree constructed by the neighbor-joining method using protein sequences of the bZIP-domains in strawberry, apple, peach, and A. thaliana. Only bootstrap values larger than 50% are indicated. Different colors can be used to distinguish the different subgroups. The names of each subgroup are listed on the right. Table S1. bZIP genes in C. sativus, M. truncatula, P. trichocarpa, B. rapa, C. papaya, T. cacao, S. lycopersicum, M. acuminata, S. moellendorffii, P. patens, C. reinhardtii, C. merolae, and S. cerevisiae. Table S2. bZIP genes in strawberry, apple and peach. Gene name, chromosomal location, sequence and location of bZIP-domain, sequence of the full-length protein. Table S3. Ka/Ks ratio of bZIP genes in clade A-S. Table S4. Ka/Ks ratio of bZIP orthologs and paralogs in clades A-S. Table S5. Ka/Ks ratios of bZIP domains, BR and LZ domains in clades A-S. Table S6. Orthologous gene pairs of bZIP genes in strawberry, apple and peach. Gene name, clade, location, ORF length, and number of exons (Fv–strawberry; Md–apple; Pp–peach). Table S7. Orthologous chromosomes in strawberry, apple and peach (FC–strawberry chromosome; MC–apple chromosome; PC–peach chromosome). [file 536943.f1.zip › 536943.f1/Supplementary/Table S5.xlsx]

## Sheet: FV-MD
Table S5. Orthologous gene pairs of bZIP genes in strawberry, apple and peach.
Name	bZIP-encoding genes in F. vesca				Name	bZIP-encoding genes in M. domestica
	Location	Clade	ORF Length	No. of Exons		Location	Clade	ORF Length	No. of Exons
mrna14556	LG1	A	684	3	MDP0000169473	chr15	A	861	3
mrna14942	LG1	S	474	1	MDP0000249561	chr2	S	474	1
mrna31621	LG1	A	1089	8	MDP0000121258	chr15	G	1575	12
mrna01680	LG2	I	1758	4	MDP0000120802	unanchored	I	1320	4
mrna02614	LG2	S	477	1	MDP0000140166	chr8	S	555	1
mrna02614	LG2	S	477	1	MDP0000190277	chr15	S	459	1
mrna08154	LG2	A	1503	7	MDP0000129112	chr15	A	1470	7
mrna08154	LG2	A	1503	7	MDP0000208334	chr10	A	945	4
mrna08186	LG2	C	1278	6	MDP0000176747	chr10	C	2610	15
mrna08186	LG2	C	1278	6	MDP0000275309	chr5	C	2400	15
mrna08484	LG2	I	1605	5	MDP0000280559	chr12	I	1743	4
mrna08484	LG2	I	1605	5	MDP0000300820	chr8	I	1527	4
mrna08566	LG2	A	651	3	MDP0000636541	chr12	A	1455	4
mrna08757	LG2	C	1101	7	MDP0000680042	chr15	C	984	5
mrna09110	LG2	A	1464	4	MDP0000296303	chr15	A	2508	4
mrna09110	LG2	A	1464	4	MDP0000701734	chr8	A	1932	5
mrna15193	LG2	S	516	1	MDP0000448715	chr12	S	474	1
mrna15193	LG2	S	516	1	MDP0000521934	chr8	S	471	1
mrna21832	LG2	S	480	1	MDP0000205823	chr8	S	480	1
mrna32629	LG2	I	1011	4	MDP0000602946	chr15	I	1266	4
mrna07844	LG3	*	975	5	MDP0000222114	chr3	*	843	6
mrna27194	LG3	E	2547	13	MDP0000133698	chr11	E	1071	4
mrna28103	LG3	I	1281	4	MDP0000120158	chr3	I	1419	6
mrna28250	LG3	A	1299	4	MDP0000248567	chr5	A	1296	4
mrna03778	LG4	D	3321	21	MDP0000145555	chr13	D	1401	10
mrna03778	LG4	D	3321	21	MDP0000250967	chr16	D	3057	19
mrna22776	LG4	H	585	4	MDP0000219041	chr13	H	729	4
mrna22776	LG4	H	585	4	MDP0000834642	chr4	H	642	4
mrna02284	LG5	S	447	1	MDP0000437680	chr3	S	429	1
mrna11837	LG5	A	834	4	MDP0000198495	chr15	A	1176	6
mrna11837	LG5	A	834	4	MDP0000706379	chr8	A	900	4
mrna26148	LG5	S	345	1	MDP0000905135	chr14	S	522	1
mrna26148	LG5	S	345	1	MDP0000917315	chr6	S	465	1
mrna31321	LG5	A	1416	5	MDP0000250947	chr8	A	1587	5
mrna31322	LG5	D	1056	8	MDP0000277999	chr15	D	2160	15
mrna32022	LG5	D	1056	6	MDP0000386314	unanchored	G	1302	9
mrna32024	LG5	G	819	6	MDP0000197219	chr1	G	1374	12
mrna32024	LG5	G	819	6	MDP0000493795	chr7	G	837	5
mrna04187	LG6	S	660	1	MDP0000407755	chr9	S	609	1
mrna04187	LG6	S	660	1	MDP0000863909	chr17	S	609	1
mrna04187	LG6	S	660	1	MDP0000891899	chr13	S	615	1
mrna11979	LG6	F	1608	6	MDP0000772633	chr7	F	738	1
mrna11979	LG6	F	1608	6	MDP0000898701	chr2	F	738	1
mrna17796	LG6	E	990	4	MDP0000178326	chr9	E	987	4
mrna17796	LG6	E	990	4	MDP0000555457	chr17	E	984	4
mrna30252	LG6	*	1599	6	MDP0000147745	chr14	*	1767	7
mrna30280	LG6	A	1314	4	MDP0000177486	chr12	A	1413	5
mrna30280	LG6	A	1314	4	MDP0000231542	chr4	A	3054	11
mrna00393	LG7	A	963	3	MDP0000215106	chr7	A	1227	7
mrna00393	LG7	A	963	3	MDP0000273211	chr2	A	1608	5
mrna14220	LG7	D	1005	8	MDP0000320524	chr7	D	1581	12
mrna18928	LG7	G	1284	12	MDP0000138052	chr7	G	1332	12
mrna18928	LG7	G	1284	12	MDP0000197219	chr1	G	1374	12
mrna21344	LG7	I	1095	4	MDP0000210251	chr12	I	1086	4
mrna07554	unanchored	F	813	1	MDP0000159670	chr10	F	843	3
mrna07554	unanchored	F	813	1	MDP0000319187	chr8	F	1086	2
mrna29546	unanchored	G	2205	17	MDP0000251332	chr2	G	1164	12

## Sheet: FV-PP
Name	bZIP-encoding genes in F. vesca				Name	bZIP-encoding genes in P. persica
	Location	Clade	ORF Length	No. of Exons		Location	Clade	ORF Length	No. of Exons
mrna14556	LG1	A	684	3	ppa018386m	scaffold_7	A	942	4
mrna14942	LG1	S	474	1	ppa012507m	scaffold_1	S	501	1
mrna14942	LG1	S	474	1	ppa012739m	scaffold_8	S	474	1
mrna14942	LG1	S	474	1	ppa013020m	scaffold_7	S	435	1
mrna16561	LG1	C	1281	6	ppa005585m	scaffold_6	C	1362	6
mrna31621	LG1	A	1089	8	ppa007578m	scaffold_6	D	1092	8
mrna08186	LG2	C	1278	6	ppa005367m	scaffold_8	C	1395	6
mrna02614	LG2	S	477	1	ppa011366m	scaffold_6	S	645	1
mrna02614	LG2	S	477	1	ppa021433m	scaffold_1	S	441	1
mrna08484	LG2	I	1605	5	ppa003452m	scaffold_1	I	1722	4
mrna08566	LG2	A	651	3	ppa018386m	scaffold_7	A	942	4
mrna08757	LG2	C	1101	7	ppa007814m	scaffold_1	C	1065	6
mrna09110	LG2	A	1464	4	ppa006503m	scaffold_1	A	1230	3
mrna09110	LG2	A	1464	4	ppa006752m	scaffold_8	A	1191	5
mrna15193	LG2	S	516	1	ppa012507m	scaffold_1	S	501	1
mrna15193	LG2	S	516	1	ppa012739m	scaffold_8	S	474	1
mrna15193	LG2	S	516	1	ppa013020m	scaffold_7	S	435	1
mrna21832	LG2	S	480	1	ppa012739m	scaffold_8	S	474	1
mrna32629	LG2	I	1011	4	ppa008658m	scaffold_8	I	972	4
mrna28103	LG3	I	1281	4	ppa006097m	scaffold_6	I	1284	5
mrna28103	LG3	I	1281	4	ppa007645m	scaffold_2	I	1083	4
mrna28250	LG3	A	1299	4	ppa006503m	scaffold_1	A	1230	3
mrna28250	LG3	A	1299	4	ppa006752m	scaffold_8	A	1191	5
mrna04504	LG4	S	1758	6	ppa011589m	scaffold_1	S	615	1
mrna22776	LG4	H	585	4	ppa011967m	scaffold_1	H	570	4
mrna02284	LG5	S	447	1	ppa013046m	scaffold_8	S	429	1
mrna11837	LG5	A	834	4	ppa025544m	scaffold_1	A	756	3
mrna13716	LG5	G	2670	16	ppa006484m	scaffold_5	G	1230	12
mrna26148	LG5	S	345	1	ppa012281m	scaffold_5	S	531	1
mrna29159	LG5	*	963	2	ppa008311m	scaffold_5	*	1014	2
mrna31321	LG5	A	1416	5	ppa024363m	scaffold_1	A	948	3
mrna31322	LG5	D	1056	8	ppa007593m	scaffold_1	D	1089	8
mrna32022	LG5	D	1056	6	ppa006173m	scaffold_2	G	1275	12
mrna32022	LG5	D	1056	6	ppa020524m	scaffold_5	G	696	3
mrna04187	LG6	S	660	1	ppa011589m	scaffold_1	S	615	1
mrna04187	LG6	S	660	1	ppa011644m	scaffold_3	S	609	1
mrna11979	LG6	F	1608	6	ppa019868m	scaffold_2	F	654	2
mrna17796	LG6	E	990	4	ppa016271m	scaffold_4	E	942	4
mrna17796	LG6	E	990	4	ppa022385m	scaffold_4	S	999	4
mrna30252	LG6	*	1599	6	ppa003901m	scaffold_7	*	1626	6
mrna30280	LG6	A	1314	4	ppa019833m	scaffold_7	A	1350	4
mrna00393	LG7	A	963	3	ppa008716m	scaffold_2	A	969	3
mrna14220	LG7	D	1005	8	ppa005279m	scaffold_7	D	1410	11
mrna18928	LG7	G	1284	12	ppa006173m	scaffold_2	G	1275	12
mrna18928	LG7	G	1284	12	ppa020524m	scaffold_5	G	696	3
mrna21344	LG7	I	1095	4	ppa006097m	scaffold_6	I	1284	5
mrna21344	LG7	I	1095	4	ppa007645m	scaffold_2	I	1083	4
mrna07554	unanchored	F	813	1	ppa009913m	scaffold_8	F	819	2
mrna11666	unanchored	H	501	4	ppa012064m	scaffold_1	H	558	5
mrna21797	unanchored	D	1632	12	ppa004537m	scaffold_6	D	1515	12

## Sheet: PP-MD
Name	bZIP-encoding genes in P. persica				Name	bZIP-encoding genes in M. domestica
	Location	Clade	ORF Length	No. of Exons		Location	Clade	ORF Length	No. of Exons
ppa002181m	scaffold_2	B	2115	4	MDP0000180785	chr2	B	2268	2
ppa002181m	scaffold_2	B	2115	4	MDP0000378041	chr7	B	303	2
ppa003452m	scaffold_1	I	1722	4	MDP0000280559	chr12	I	1743	4
ppa003452m	scaffold_1	I	1722	4	MDP0000300820	chr8	I	1527	4
ppa003825m	scaffold_7	D	1641	11	MDP0000320322	chr14	D	1629	11
ppa003901m	scaffold_7	*	1626	6	MDP0000147745	chr14	*	1767	7
ppa005279m	scaffold_7	D	1410	11	MDP0000536881	unanchored	D	1353	11
ppa005585m	scaffold_6	C	1362	6	MDP0000270365	chr12	C	1314	6
ppa006097m	scaffold_6	I	1284	5	MDP0000247372	chr4	I	1266	5
ppa006097m	scaffold_6	I	1284	5	MDP0000295681	chr3	I	963	3
ppa006097m	scaffold_6	I	1284	5	MDP0000297791	chr11	I	1347	4
ppa006173m	scaffold_2	G	1275	12	MDP0000138052	chr7	G	1332	12
ppa006173m	scaffold_2	G	1275	12	MDP0000197219	chr1	G	1374	12
ppa007578m	scaffold_6	D	1092	8	MDP0000121258	chr15	G	1575	12
ppa007593m	scaffold_1	D	1089	8	MDP0000277999	chr15	D	2160	15
ppa007645m	scaffold_2	I	1083	4	MDP0000210251	chr12	I	1086	4
ppa007645m	scaffold_2	I	1083	4	MDP0000297791	chr11	I	1347	4
ppa007814m	scaffold_1	C	1065	6	MDP0000680042	chr15	C	984	5
ppa008024m	scaffold_7	G	1047	11	MDP0000251332	chr2	G	1164	12
ppa008658m	scaffold_8	I	972	4	MDP0000602946	chr15	I	1266	4
ppa008716m	scaffold_2	A	969	3	MDP0000215106	chr7	A	1227	7
ppa008716m	scaffold_2	A	969	3	MDP0000273211	chr2	A	1608	5
ppa009913m	scaffold_8	F	819	2	MDP0000159670	chr10	F	843	3
ppa009913m	scaffold_8	F	819	2	MDP0000319187	chr8	F	1086	2
ppa011366m	scaffold_6	S	645	1	MDP0000738631	chr8	S	687	1
ppa011589m	scaffold_1	S	615	1	MDP0000183562	chr16	S	1083	4
ppa011589m	scaffold_1	S	615	1	MDP0000407755	chr9	S	609	1
ppa011589m	scaffold_1	S	615	1	MDP0000863909	chr17	S	609	1
ppa011589m	scaffold_1	S	615	1	MDP0000891899	chr13	S	615	1
ppa011644m	scaffold_3	S	609	1	MDP0000407755	chr9	S	609	1
ppa011644m	scaffold_3	S	609	1	MDP0000863909	chr17	S	609	1
ppa011644m	scaffold_3	S	609	1	MDP0000891899	chr13	S	615	1
ppa011967m	scaffold_1	H	570	4	MDP0000219041	chr13	H	729	4
ppa011967m	scaffold_1	H	570	4	MDP0000834642	chr4	H	642	4
ppa012064m	scaffold_1	H	558	5	MDP0000586302	chr12	H	495	4
ppa012281m	scaffold_5	S	531	1	MDP0000905135	chr14	S	522	1
ppa012281m	scaffold_5	S	531	1	MDP0000917315	chr6	S	465	1
ppa012507m	scaffold_1	S	501	1	MDP0000249561	chr2	S	474	1
ppa012507m	scaffold_1	S	501	1	MDP0000521934	chr8	S	471	1
ppa012739m	scaffold_8	S	474	1	MDP0000205823	chr8	S	480	1
ppa012739m	scaffold_8	S	474	1	MDP0000239026	chr11	S	483	1
ppa012739m	scaffold_8	S	474	1	MDP0000448715	chr12	S	474	1
ppa012739m	scaffold_8	S	474	1	MDP0000521934	chr8	S	471	1
ppa013020m	scaffold_7	S	435	1	MDP0000249561	chr2	S	474	1
ppa013046m	scaffold_8	S	429	1	MDP0000234798	chr11	S	426	1
ppa013046m	scaffold_8	S	429	1	MDP0000437680	chr3	S	429	1
ppa016271m	scaffold_4	E	942	4	MDP0000133698	chr11	E	1071	4
ppa016271m	scaffold_4	E	942	4	MDP0000178326	chr9	E	987	4
ppa016271m	scaffold_4	E	942	4	MDP0000555457	chr17	E	984	4
ppa018386m	scaffold_7	A	942	4	MDP0000169473	chr15	A	861	3
ppa018386m	scaffold_7	A	942	4	MDP0000470928	chr2	A	723	3
ppa019833m	scaffold_7	A	1350	4	MDP0000177486	chr12	A	1413	5
ppa019842m	scaffold_1	D	1395	11	MDP0000145555	chr13	D	1401	10
ppa019868m	scaffold_2	F	654	2	MDP0000898701	chr2	F	738	1
ppa020524m	scaffold_5	G	696	3	MDP0000138052	chr7	G	1332	12
ppa020524m	scaffold_5	G	696	3	MDP0000197219	chr1	G	1374	12
ppa021433m	scaffold_1	S	441	1	MDP0000140166	chr8	S	555	1
ppa021433m	scaffold_1	S	441	1	MDP0000190277	chr15	S	459	1
ppa022385m	scaffold_4	S	999	4	MDP0000133698	chr11	E	1071	4
ppa022385m	scaffold_4	S	999	4	MDP0000134936	chr3	E	1062	4
ppa022385m	scaffold_4	S	999	4	MDP0000555457	chr17	E	984	4
ppa024363m	scaffold_1	A	948	3	MDP0000250947	chr8	A	1587	5
ppa025544m	scaffold_1	A	756	3	MDP0000198495	chr15	A	1176	6
ppa025544m	scaffold_1	A	756	3	MDP0000706379	chr8	A	900	4
